# Supplementary material for: Highly enantioselective organocatalytic Strecker reaction of cyclic N-acyl trifluoromethylketimines: synthesis of anti-HIV drug DPC 083
Source: Royal Society of Chemistry journal article supplement (doi:10.1039/c2cc36307k), 2012-01-01

## Electronic Supplementary Information

### Highly Enantioselective Organocatalytic Strecker Reaction of Cyclic *N*-Acyl Trifluoromethylketimines: Synthesis of Anti-HIV Drug DPC

083

Fa-Guang Zhang,<sup>a</sup> Xiao-Yan Zhu,<sup>a</sup> Shen Li,<sup>a</sup> Jing Nie<sup>a</sup> and Jun-An Ma<sup>\*ab</sup>

<sup>a</sup> *Department of Chemistry, Tianjin University, Tianjin 300072, P. R. of China. Fax: (+86)-22-2740-3475; E-mail: majun\_an68@tju.edu.cn*

<sup>b</sup> *Key Laboratory of Organofluorine Chemistry, Shanghai Institute of Organic Chemistry (CAS), Shanghai 200032, China*

## 1. General information:

$^1\text{H}$ ,  $^{13}\text{C}$  and  $^{19}\text{F}$  NMR spectra were recorded on a Bruker AV 400 MHz spectrometer at 400 MHz ( $^1\text{H}$  NMR), 100 MHz ( $^{13}\text{C}$  NMR), as well as 376 MHz ( $^{19}\text{F}$  NMR). Chemical shifts were reported in parts per million (ppm) from the solvent resonance as the internal standard ( $\text{CDCl}_3$ :  $\delta_{\text{H}} = 7.26$  ppm,  $\delta_{\text{C}} = 77.16$  ppm;  $\text{d}_6$ -DMSO:  $\delta_{\text{H}} = 2.50$  ppm,  $\delta_{\text{C}} = 39.52$  ppm;  $\text{CD}_3\text{OD}$ ,  $\delta_{\text{H}} = 3.31$  ppm). High resolution mass spectrometry (HRMS) spectra were obtained on a micrOTOF-QII Instrument. IR spectra were recorded on an AVATAR 360 FT-IR spectrometer. High Pressure Liquid chromatography (HPLC) analyses were carried out on a Hewlett Packard Model HP 1200 instrument. Melting points (MP) were measured on a WRS-1A digital melting point apparatus and are uncorrected. Optical rotations were determined using an Autopol IV automatic polarimeter.

## Materials:

Tetrahydrofuran (THF), diethyl ether and toluene were distilled from sodium / benzophenone prior to use;  $\text{CH}_2\text{Cl}_2$  were distilled from  $\text{CaH}_2$ ;  $\text{CH}_3\text{OH}$  were distilled from sodium;  $\text{CH}_3\text{CN}$  were distilled from  $\text{P}_2\text{O}_5$ . All purchased reagents were used without further purification. Analytical thin layer chromatography was performed on 0.20 mm Qingdao Haiyang silica gel plates. Silica gel (200-300 mesh) (from Qingdao Haiyang Chem. Company, Ltd.) was used for flash chromatography. Ketimines **1a** – **1l** were synthesized according to the known procedures.<sup>1</sup> Thioureas **2a** – **2d** were synthesized in our laboratory as before.<sup>2</sup> Thioureas **2f** – **2i** were synthesized according to the literatures.<sup>3</sup> TMSCN was purchased from ACROS Organics. Standard reagents and solvents were purified according to known procedures.

## 2. General procedure for the asymmetric strecker reactions

To the reaction mixture of trifluoromethyl ketimines **1** (0.1 mmol) and catalyst (**2g** or **2i**, 0.001 mmol) in toluene (2 mL) at 0 °C was added TMS-CN (0.2 mmol). The resulting mixture was then stirred at 0 °C until reaction completed (detected by TLC). Purification by column chromatography on silica gel (petroleum ether / ethyl acetate = 10:1) afforded the product **3** or *ent*-**3**.

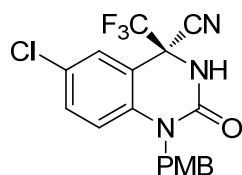

### (*R*)-6-chloro-1-(4-methoxybenzyl)-2-oxo-4-(trifluoromethyl)-1,2,3,4-tetrahydroquinazoline-4-carbonitrile (**3a**)

40 mg, white solid, mp 122–124 °C, 99% yield, 96% ee,  $[\alpha]_D^{25} -23.4$  (*c* 1.0, CH<sub>2</sub>Cl<sub>2</sub>), **<sup>1</sup>H NMR** (400 MHz, CDCl<sub>3</sub>) δ 8.16 (s, 1H), 7.56 (s, 1H), 7.34 (d, *J* = 8.8 Hz, 1H), 7.17 (d, *J* = 8.3 Hz, 2H), 6.92 (d, *J* = 8.9 Hz, 1H), 6.86 (d, *J* = 8.3 Hz, 2H), 5.20 (d, *J* = 16.3 Hz, 1H), 5.04 (d, *J* = 16.3 Hz, 1H), 3.78 (s, 3H). **<sup>19</sup>F NMR** (376 MHz, CDCl<sub>3</sub>) δ –80.71 (s, 3F). **<sup>13</sup>C NMR** (100 MHz, CDCl<sub>3</sub>) δ 159.3, 151.4, 136.3, 132.5, 129.0, 128.1, 127.9, 127.4, 122.1 (q, <sup>1</sup>*J*<sub>F-C</sub> = 288.1 Hz), 117.1, 114.6, 113.4, 111.9, 59.4 (q, <sup>2</sup>*J*<sub>F-C</sub> = 34.8 Hz), 55.4, 46.0. **HRMS** (ESI) found: *m/z* 418.0546 [M+Na]<sup>+</sup>; calcd. for C<sub>18</sub>H<sub>13</sub>ClF<sub>3</sub>N<sub>3</sub>O<sub>2</sub>+Na 418.0648; **IR** (KBr): ν 3208, 3092, 2937, 1688, 1514, 1429, 1388, 1250, 1193, 1026, 809, 743, 509 cm<sup>-1</sup>; **HPLC** (DAICEL Chiralpak IC, hexane / *i*PrOH (IPA) = 80:20, 1.0 mL / min, 254 nm) *t*<sub>R</sub> (major) = 26.1 min, *t*<sub>R</sub> (minor) = 6.5 min.

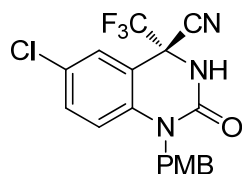

(*S*)-**3a**, 40 mg, white solid, mp 130–132 °C, 99% yield, 95% ee,  $[\alpha]_D^{25} +22.4$  (*c* 1.0, CH<sub>2</sub>Cl<sub>2</sub>), **HPLC** (DAICEL Chiralpak IC, hexane / IPA = 80:20, 1.0 mL / min, 254 nm) *t*<sub>R</sub> (major) = 6.5 min, *t*<sub>R</sub> (minor) = 27.0 min.

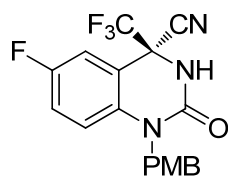

**(R)-6-fluoro-1-(4-methoxybenzyl)-2-oxo-4-(trifluoromethyl)-1,2,3,4-tetrahydroquinazoline-4-carbonitrile (3b)**

38 mg, white solid, mp 128–130 °C, 99% yield, 96% ee,  $[\alpha]_D^{25} -16.0$  ( $c$  1.0, CH<sub>2</sub>Cl<sub>2</sub>), **<sup>1</sup>H NMR** (400 MHz, CDCl<sub>3</sub>)  $\delta$  8.50 (s, 1H), 7.32 (d,  $J$  = 6.8 Hz, 1H), 7.19 (d,  $J$  = 8.4 Hz, 2H), 7.13 – 7.08 (m, 1H), 6.96 (dd,  $J$  = 9.1, 4.3 Hz, 1H), 6.87 (d,  $J$  = 8.5 Hz, 2H), 5.21 (d,  $J$  = 16.3 Hz, 1H), 5.06 (d,  $J$  = 16.3 Hz, 1H), 3.78 (s, 3H). **<sup>19</sup>F NMR** (376 MHz, CDCl<sub>3</sub>)  $\delta$  -80.64 (s, 3F), -118.15 ~ -118.20 (m, 1F). **<sup>13</sup>C NMR** (100 MHz, CDCl<sub>3</sub>)  $\delta$  159.3, 158.3 (d,  $^1J_{F-C}$  = 244.4 Hz), 151.8, 134.0, 128.0, 127.6, 122.1 (q,  $^1J_{F-C}$  = 287.9 Hz), 119.4 (d,  $^2J_{F-C}$  = 22.3 Hz), 117.3 (d,  $^3J_{F-C}$  = 7.6 Hz), 115.3 (d,  $^2J_{F-C}$  = 25.1 Hz), 114.6, 113.4, 111.7 (d,  $^3J_{F-C}$  = 7.6 Hz), 59.5 (q,  $^2J_{F-C}$  = 34.2 Hz), 55.4, 46.1. **HRMS** (ESI) found:  $m/z$  378.1111 [M]<sup>-</sup>; calcd. for C<sub>18</sub>H<sub>13</sub>F<sub>4</sub>N<sub>3</sub>O<sub>2</sub>-H 378.0944; **IR** (KBr):  $\nu$  3209, 3088, 2931, 1689, 1518, 1447, 1394, 1250, 1195, 1027, 868, 744, 622, 516 cm<sup>-1</sup>; **HPLC** (DAICEL Chiralpak IC, hexane / IPA = 75:25, 0.8 mL / min, 254 nm)  $t_R$  (major) = 27.0 min,  $t_R$  (minor) = 7.8 min.

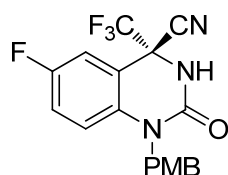

**(S)-3b**, 36 mg, white solid, mp 142–144 °C, 96% yield, 95% ee,  $[\alpha]_D^{25} +18.2$  ( $c$  1.0, CH<sub>2</sub>Cl<sub>2</sub>), **HPLC** (DAICEL Chiralpak IC, hexane / IPA = 75:25, 0.8 mL / min, 254 nm)  $t_R$  (major) = 7.9 min,  $t_R$  (minor) = 29.5 min.

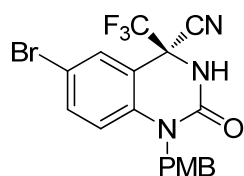

**(R)-6-bromo-1-(4-methoxybenzyl)-2-oxo-4-(trifluoromethyl)-1,2,3,4-tetrahydroquinazoline-4-carbonitrile (3c)**

42 mg, white solid, mp 140–142 °C, 95% yield, 94% ee,  $[\alpha]_{\text{D}}^{25} -28.4$  ( $c$  1.0,  $\text{CH}_2\text{Cl}_2$ ),  **$^1\text{H}$  NMR** (400 MHz,  $\text{d}_6$ -DMSO)  $\delta$  9.90 (s, 1H), 7.70 – 7.63 (m, 2H), 7.16 (d,  $J$  = 8.5 Hz, 2H), 7.06 (d,  $J$  = 8.8 Hz, 1H), 6.87 (d,  $J$  = 8.5 Hz, 2H), 5.17 (d,  $J$  = 16.4 Hz, 1H), 4.96 (d,  $J$  = 16.5 Hz, 1H), 3.69 (s, 3H).  **$^{19}\text{F}$  NMR** (376 MHz,  $\text{d}_6$ -DMSO)  $\delta$  –80.04 (s, 3F).  **$^{13}\text{C}$  NMR** (100 MHz,  $\text{d}_6$ -DMSO)  $\delta$  158.4, 149.9, 137.0, 135.2, 129.5, 127.8, 127.7, 121.9 (q,  $^1J_{\text{F-C}}$  = 288.6 Hz), 117.8, 114.2, 114.0, 113.4, 111.4, 58.5 (q,  $^2J_{\text{F-C}}$  = 33.6 Hz), 55.0, 44.1. **HRMS** (ESI) found:  $m/z$  438.0255  $[\text{M}]^-$ ; calcd. for  $\text{C}_{18}\text{H}_{13}\text{BrF}_3\text{N}_3\text{O}_2\text{-H}$  438.0143; **IR** (KBr):  $\nu$  3213, 3097, 2938, 1689, 1513, 1425, 1385, 1250, 1200, 1027, 808, 744, 536, 507  $\text{cm}^{-1}$ ; **HPLC** (DAICEL Chiralpak IC, hexane / IPA = 80:20, 0.8 mL / min, 254 nm)  $t_{\text{R}}$  (major) = 22.0 min,  $t_{\text{R}}$  (minor) = 7.4 min.

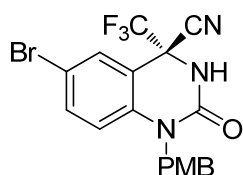

(*S*)-**3c**, 42 mg, white solid, mp 143–145 °C, 96% yield, 92% ee,  $[\alpha]_{\text{D}}^{25} +31.6$  ( $c$  1.0,  $\text{CH}_2\text{Cl}_2$ ), **HPLC** (DAICEL Chiralpak IC, hexane / IPA = 80:20, 0.8 mL / min, 254 nm)  $t_{\text{R}}$  (major) = 7.4 min,  $t_{\text{R}}$  (minor) = 22.3 min.

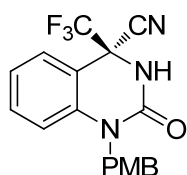

**(*R*)-1-(4-methoxybenzyl)-2-oxo-4-(trifluoromethyl)-1,2,3,4-tetrahydroquinazoline-4-carbonitrile (3d)**

33 mg, white solid, mp 138–140 °C, 93% yield, 95% ee,  $[\alpha]_{\text{D}}^{25} -15.6$  ( $c$  1.0,  $\text{CH}_2\text{Cl}_2$ ),  **$^1\text{H}$  NMR** (400 MHz,  $\text{CDCl}_3$ )  $\delta$  8.52 (s, 1H), 7.60 (d,  $J$  = 7.7 Hz, 1H), 7.38 (t,  $J$  = 7.8 Hz, 1H), 7.23 (d,  $J$  = 8.4 Hz, 2H), 7.16 (t,  $J$  = 7.6 Hz, 1H), 7.01 (d,  $J$  = 8.4 Hz, 1H), 6.88 (d,  $J$  = 8.5 Hz, 2H), 5.24 (d,  $J$  = 16.2 Hz, 1H), 5.09 (d,  $J$  = 16.3 Hz, 1H), 3.78 (s, 3H).  **$^{19}\text{F}$  NMR** (376 MHz,  $\text{CDCl}_3$ )  $\delta$  –80.86 (s, 3F).  **$^{13}\text{C}$  NMR** (100 MHz,  $\text{CDCl}_3$ )  $\delta$  159.1, 152.0, 137.6, 132.3, 128.2, 128.0, 127.9, 123.4, 122.3 (q,  $^1J_{\text{F-C}}$  = 287.5 Hz), 115.6, 114.5, 113.9, 110.4, 59.7 (q,  $^2J_{\text{F-C}}$  = 34.1 Hz), 55.3, 45.8. **HRMS** (ESI) found:

$m/z$  384.1024  $[M+Na]^+$ ; calcd. for  $C_{18}H_{14}F_3N_3O_2+Na$  384.1038; **IR** (KBr):  $\nu$  3444, 3211, 3092, 2933, 1683, 1606, 1514, 1460, 1399, 1249, 1096, 1037, 826, 753, 499  $cm^{-1}$ ; **HPLC** (DAICEL Chiralpak IC, hexane / IPA = 80:20, 0.8 mL / min, 254 nm)  $t_R$  (major) = 38.4 min,  $t_R$  (minor) = 11.8 min.

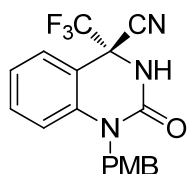

(*S*)-**3d**, 33 mg, white solid, mp 141–142 °C, 91% yield, 95% ee,  $[\alpha]_D^{25} +17.4$  ( $c$  1.0,  $CH_2Cl_2$ ), **HPLC** (DAICEL Chiralpak IC, hexane / IPA = 80:20, 0.8 mL / min, 254 nm)  $t_R$  (major) = 11.8 min,  $t_R$  (minor) = 39.0 min.

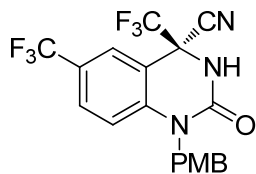

**(*R*)-1-(4-methoxybenzyl)-2-oxo-4,6-bis(trifluoromethyl)-1,2,3,4-tetrahydroquinazoline-4-carbonitrile (3e)**

40 mg, white solid, mp 128–129 °C, 94% yield, 92% ee,  $[\alpha]_D^{25} -7.4$  ( $c$  1.0,  $CH_2Cl_2$ ),  **$^1H$  NMR** (400 MHz,  $CDCl_3$ )  $\delta$  8.59 (s, 1H), 7.83 (s, 1H), 7.65 (d,  $J$  = 8.7 Hz, 1H), 7.20 (d,  $J$  = 8.5 Hz, 2H), 7.12 (d,  $J$  = 8.8 Hz, 1H), 6.89 (d,  $J$  = 8.6 Hz, 2H), 5.27 (d,  $J$  = 17.6 Hz, 1H), 5.11 (d,  $J$  = 16.3 Hz, 1H), 3.79 (s, 3H).  **$^{19}F$  NMR** (376 MHz,  $CDCl_3$ )  $\delta$  -62.34 (s, 3F), -80.88 (s, 3F).  **$^{13}C$  NMR** (100 MHz,  $CDCl_3$ )  $\delta$  159.5, 151.7, 140.5, 129.6, 128.0, 127.0, 125.9 (q,  $^2J_{F-C}$  = 33.9 Hz), 125.5, 123.3 (q,  $^1J_{F-C}$  = 270.3 Hz), 122.1 (q,  $^1J_{F-C}$  = 287.8 Hz), 116.2, 114.7, 113.2, 111.0, 59.5 (q,  $^2J_{F-C}$  = 34.2 Hz), 55.4, 46.2. **HRMS** (ESI) found:  $m/z$  428.1123  $[M]^-$ ; calcd. for  $C_{19}H_{13}F_6N_3O_2-H$  428.0912; **IR** (KBr):  $\nu$  3451, 3204, 2938, 1703, 1626, 1518, 1390, 1333, 1250, 1200, 1129, 1090, 826, 749, 538  $cm^{-1}$ ; **HPLC** (DAICEL Chiralpak IC, hexane / IPA = 80:20, 0.8 mL / min, 254 nm)  $t_R$  (major) = 11.1 min,  $t_R$  (minor) = 5.7 min.

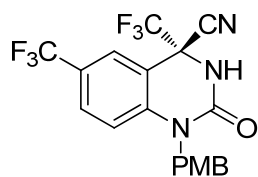

(*S*)-**3e**, 40 mg, white solid, mp 122–124 °C, 93% yield, 90% ee,  $[\alpha]_D^{25} +10.0$  (*c* 1.0, CH<sub>2</sub>Cl<sub>2</sub>), **HPLC** (DAICEL Chiralpak IC, hexane / IPA = 80:20, 0.8 mL / min, 254 nm) *t<sub>R</sub>* (major) = 5.7 min, *t<sub>R</sub>* (minor) = 11.2 min.

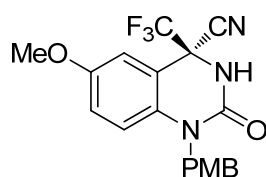

(*R*)-6-methoxy-1-(4-methoxybenzyl)-2-oxo-4-(trifluoromethyl)-1,2,3,4-tetrahydroquinazoline-4-carbonitrile (**3f**)

37 mg, white solid, mp 115–116 °C, 95% yield, 94% ee,  $[\alpha]_D^{25} -25.0$  (*c* 1.0, CH<sub>2</sub>Cl<sub>2</sub>), **<sup>1</sup>H NMR** (400 MHz, CDCl<sub>3</sub>) δ 8.20 (s, 1H), 7.19 (d, *J* = 8.5 Hz, 2H), 7.09 (s, 1H), 6.91 (s, 2H), 6.86 (d, *J* = 8.6 Hz, 2H), 5.19 (d, *J* = 16.3 Hz, 1H), 5.03 (d, *J* = 16.3 Hz, 1H), 3.79 (s, 3H), 3.77 (s, 3H). **<sup>19</sup>F NMR** (376 MHz, CDCl<sub>3</sub>) δ -80.52 (s, 3F). **<sup>13</sup>C NMR** (100 MHz, CDCl<sub>3</sub>) δ 159.1, 155.6, 151.7, 131.0, 129.0, 128.1, 128.0, 122.3 (q, <sup>1</sup>*J*<sub>F-C</sub> = 287.7 Hz), 118.0, 116.9, 114.5, 113.4, 111.3, 59.8 (q, <sup>2</sup>*J*<sub>F-C</sub> = 34.0 Hz), 55.9, 55.4, 45.8. **HRMS** (ESI) found: *m/z* 414.1082 [M+Na]<sup>+</sup>; calcd. for C<sub>19</sub>H<sub>16</sub>F<sub>3</sub>N<sub>3</sub>O<sub>3</sub>+Na 414.1144; **IR** (KBr): ν 3210, 3092, 2943, 1727, 1682, 1517, 1459, 1392, 1253, 1196, 1022, 748, 623, 507 cm<sup>-1</sup>; **HPLC** (DAICEL Chiralpak IC, hexane / IPA = 80:20, 1.0 mL / min, 254 nm) *t<sub>R</sub>* (major) = 40.3 min, *t<sub>R</sub>* (minor) = 8.6 min.

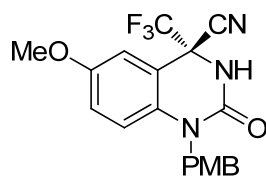

(*S*)-**3f**, 36 mg, white solid, mp 115–117 °C, 93% yield, 97% ee,  $[\alpha]_D^{25} +26.6$  (*c* 1.0, CH<sub>2</sub>Cl<sub>2</sub>), **HPLC** (DAICEL Chiralpak IC, hexane / IPA = 80:20, 1.0 mL / min, 254 nm) *t<sub>R</sub>* (major) = 8.8 min, *t<sub>R</sub>* (minor) = 46.1 min.

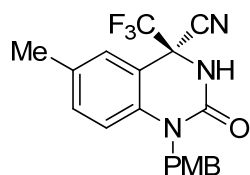

**(*R*)-1-(4-methoxybenzyl)-6-methyl-2-oxo-4-(trifluoromethyl)-1,2,3,4-tetrahydroquinazoline-4-carbonitrile (3g)**

36 mg, white solid, mp 128–130 °C, 96% yield, 94% ee,  $[\alpha]_{\text{D}}^{25} -18.8$  (*c* 1.0, CH<sub>2</sub>Cl<sub>2</sub>), **<sup>1</sup>H NMR** (400 MHz, CDCl<sub>3</sub>)  $\delta$  8.33 (s, 1H), 7.38 (s, 1H), 7.19 (t, *J* = 10.0 Hz, 3H), 6.88 (t, *J* = 7.3 Hz, 3H), 5.21 (d, *J* = 16.2 Hz, 1H), 5.05 (d, *J* = 16.2 Hz, 1H), 3.77 (s, 3H), 2.33 (s, 3H). **<sup>19</sup>F NMR** (376 MHz, CDCl<sub>3</sub>)  $\delta$  -80.78 (s, 3F). **<sup>13</sup>C NMR** (100 MHz, CDCl<sub>3</sub>)  $\delta$  159.1, 151.9, 135.2, 133.4, 132.9, 128.5, 128.1, 128.0, 122.3 (q,  $^1J_{\text{F-C}}$  = 287.5 Hz), 115.6, 114.4, 114.0, 110.2, 59.8 (q,  $^2J_{\text{F-C}}$  = 34.2 Hz), 55.4, 45.7, 20.5. **HRMS** (ESI) found: *m/z* 398.1046 [M+Na]<sup>+</sup>; calcd. for C<sub>19</sub>H<sub>16</sub>F<sub>3</sub>N<sub>3</sub>O<sub>2</sub>+Na 398.1195; **IR** (KBr):  $\nu$  3203, 3079, 2931, 1679, 1517, 1397, 1248, 1187, 1024, 804, 742, 623, 511, 438 cm<sup>-1</sup>; **HPLC** (DAICEL Chiralpak IC, hexane / IPA = 80:20, 0.8 mL / min, 254 nm) *t<sub>R</sub>* (major) = 28.2 min, *t<sub>R</sub>* (minor) = 9.8 min.

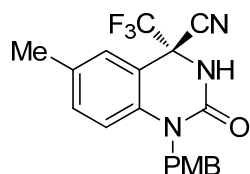

(*S*)-**3g**, 35 mg, white solid, mp 130–131 °C, 93% yield, 94% ee,  $[\alpha]_{\text{D}}^{25} +22.0$  (*c* 1.0, CH<sub>2</sub>Cl<sub>2</sub>), **HPLC** (DAICEL Chiralpak IC, hexane / IPA = 80:20, 0.8 mL / min, 254 nm) *t<sub>R</sub>* (major) = 9.8 min, *t<sub>R</sub>* (minor) = 28.4 min.

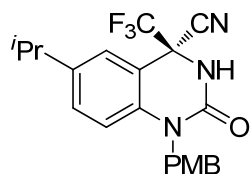

**(*R*)-6-isopropyl-1-(4-methoxybenzyl)-2-oxo-4-(trifluoromethyl)-1,2,3,4-tetrahydroquinazoline-4-carbonitrile (3h)**



38 mg, white solid, mp 152–153 °C, 96% yield, 94% ee,  $[\alpha]_{\text{D}}^{25} -26.0$  (*c* 1.0, CH<sub>2</sub>Cl<sub>2</sub>), **<sup>1</sup>H NMR** (400 MHz, CDCl<sub>3</sub>) δ 7.93 (s, 1H), 7.40 (s, 1H), 7.25 (d, *J* = 1.5 Hz, 1H), 7.21 (d, *J* = 8.5 Hz, 2H), 6.91 (d, *J* = 8.6 Hz, 1H), 6.87 (d, *J* = 8.6 Hz, 2H), 5.19 (d, *J* = 16.2 Hz, 1H), 5.06 (d, *J* = 16.2 Hz, 1H), 3.78 (s, 3H), 2.94 – 2.87(m, 1H), 1.24 (s, 3H), 1.22 (s, 3H). **<sup>19</sup>F NMR** (376 MHz, CDCl<sub>3</sub>) δ –80.90 (s, 3F). **<sup>13</sup>C NMR** (100 MHz, CDCl<sub>3</sub>) δ 159.2, 151.7, 144.4, 135.5, 130.3, 128.2, 128.0, 126.2, 122.3 (q, <sup>1</sup>*J*<sub>F-C</sub> = 287.6 Hz), 115.6, 114.5, 114.0, 110.1, 59.9 (q, <sup>2</sup>*J*<sub>F-C</sub> = 34.0 Hz), 55.4, 45.8, 33.4, 23.9, 23.8. **HRMS** (ESI) found: *m/z* 426.1382 [M+Na]<sup>+</sup>; calcd. for C<sub>21</sub>H<sub>20</sub>F<sub>3</sub>N<sub>3</sub>O<sub>2</sub>+Na 426.1508; **IR** (KBr): ν 3213, 3088, 2959, 1686, 1517, 1445, 1395, 1246, 1196, 1038, 820, 619, 442 cm<sup>-1</sup>; **HPLC** (DAICEL Chiralpak IC, hexane / IPA = 80:20, 1.0 mL / min, 254 nm) *t*<sub>R</sub> (major) = 12.3 min, *t*<sub>R</sub> (minor) = 6.4 min.

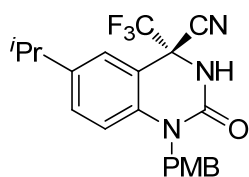

(*S*)-**3h**, 38 mg, white solid, mp 132–134 °C, 95% yield, 96% ee,  $[\alpha]_{\text{D}}^{25} +22.8$  (*c* 1.0, CH<sub>2</sub>Cl<sub>2</sub>), **HPLC** (DAICEL Chiralpak IC, hexane / IPA = 80:20, 1.0 mL / min, 254 nm) *t*<sub>R</sub> (major) = 6.6 min, *t*<sub>R</sub> (minor) = 13.3 min.

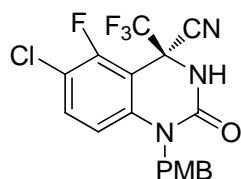

**(*R*)-6-chloro-5-fluoro-1-(4-methoxybenzyl)-2-oxo-4-(trifluoromethyl)-1,2,3,4-tetrahydroquinazoline-4-carbonitrile (3i)**

40 mg, white solid, mp 140–142 °C, 98% yield, 96% ee,  $[\alpha]_{\text{D}}^{25} -20.4$  (*c* 1.0, CH<sub>2</sub>Cl<sub>2</sub>), **<sup>1</sup>H NMR** (400 MHz, d<sub>6</sub>-DMSO) δ 10.11 (s, 1H), 7.72 (d, *J* = 7.2 Hz, 1H), 7.16 (d, *J* = 8.5 Hz, 2H), 6.97 (d, *J* = 9.2 Hz, 1H), 6.88 (d, *J* = 8.5 Hz, 2H), 5.19 (d, *J* = 16.5 Hz, 1H), 4.98 (d, *J* = 16.5 Hz, 1H), 3.70 (s, 3H). **<sup>19</sup>F NMR** (376 MHz, d<sub>6</sub>-DMSO) δ –80.29 (d, *J* = 15.4 Hz, 3F), –111.92 ~ –111.97 (m, 1F). **<sup>13</sup>C NMR** (100 MHz,

$d_6$ -DMSO)  $\delta$  166.9, 158.5, 154.0 (d,  $^1J_{F-C}$  = 250.2 Hz), 134.0, 131.4, 128.6, 127.7, 122.0 (q,  $^1J_{F-C}$  = 288.7 Hz), 114.1, 113.7 (d,  $^2J_{F-C}$  = 17.9 Hz), 112.6 (d,  $^3J_{F-C}$  = 3.5 Hz), 111.8, 99.6 (d,  $^2J_{F-C}$  = 14.9 Hz), 55.3 (q,  $^2J_{F-C}$  = 34.8 Hz), 55.0, 44.4. **HRMS** (ESI) found:  $m/z$  412.0759  $[M]^-$ ; calcd. for  $C_{21}H_{20}F_3N_3O_2-H$  412.0554; **IR** (KBr):  $\nu$  3211, 3088, 2929, 1683, 1614, 1510, 1461, 1387, 1245, 1200, 1040, 812, 616, 507  $cm^{-1}$ ; **HPLC** (DAICEL Chiralpak IC, hexane / IPA = 75:25, 0.8 mL / min, 254 nm)  $t_R$  (major) = 64.0 min,  $t_R$  (minor) = 7.4 min.

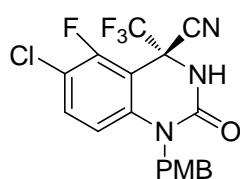

(*S*)-**3i**, 37 mg, white solid, mp 145–146 °C, 91% yield, 94% ee,  $[\alpha]_D^{25}$  +21.6 ( $c$  1.0,  $CH_2Cl_2$ ), **HPLC** (DAICEL Chiralpak IC, hexane / IPA = 75:25, 1.0 mL / min, 254 nm)  $t_R$  (major) = 7.4 min,  $t_R$  (minor) = 69.0 min.

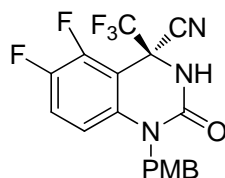

(*R*)-**5,6-difluoro-1-(4-methoxybenzyl)-2-oxo-4-(trifluoromethyl)-1,2,3,4-tetrahydroquinazoline-4-carbonitrile (3j)**

38 mg, white solid, mp 174–176 °C, 96% yield, 96% ee,  $[\alpha]_D^{25}$  –11.2 ( $c$  1.0,  $CH_2Cl_2$ ),  **$^1H$  NMR** (400 MHz,  $d_6$ -DMSO)  $\delta$  10.04 (s, 1H), 7.65 (dd,  $J$  = 18.7, 9.4 Hz, 1H), 7.16 (d,  $J$  = 8.5 Hz, 2H), 6.94 (dd,  $J$  = 12.1, 4.3 Hz, 1H), 6.88 (d,  $J$  = 8.6 Hz, 2H), 5.18 (d,  $J$  = 16.4 Hz, 1H), 4.97 (d,  $J$  = 16.5 Hz, 1H), 3.70 (s, 3H).  **$^{19}F$  NMR** (376 MHz,  $d_6$ -DMSO)  $\delta$  –80.28 (d,  $J$  = 14.7 Hz, 3F), –135.09 ~ –135.29 (m, 1F), –144.63 ~ –144.72 (m, 1F).  **$^{13}C$  NMR** (100 MHz,  $d_6$ -DMSO)  $\delta$  158.5, 149.6, 146.8 (dd,  $^1J_{F-C}$  = 250.5 Hz,  $^2J_{F-C}$  = 16.2 Hz), 145.0 (dd,  $^1J_{F-C}$  = 241.6 Hz,  $^2J_{F-C}$  = 12.2 Hz), 134.9, 127.8, 127.7, 122.0 (q,  $^1J_{F-C}$  = 289.3 Hz), 121.2 (d,  $^2J_{F-C}$  = 17.7 Hz), 114.1, 111.8, 111.6 (d,  $^3J_{F-C}$  = 2.8 Hz), 99.7 (d,  $^2J_{F-C}$  = 11.9 Hz), 55.2 (q,  $^2J_{F-C}$  = 30.1 Hz), 55.0, 44.4. **HRMS**

(ESI) found:  $m/z$  420.0716  $[M+Na]^+$ ; calcd. for  $C_{18}H_{12}F_5N_3O_2+Na$  420.0850; **IR** (KBr):  $\nu$  3211, 3088, 2926, 1684, 1613, 1516, 1483, 1394, 1245, 1200, 1033, 963, 811, 650, 507  $cm^{-1}$ ; **HPLC** (DAICEL Chiralpak IB, hexane / IPA = 90:10, 1.0 mL / min, 254 nm)  $t_R$  (major) = 15.4 min,  $t_R$  (minor) = 11.9 min.

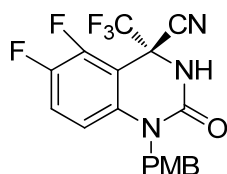

(*S*)-**3j**, 36 mg, white solid, mp 156–158 °C, 91% yield, 94% ee,  $[\alpha]_D^{25} +12.6$  ( $c$  1.0,  $CH_2Cl_2$ ), **HPLC** (DAICEL Chiralpak IB, hexane / IPA = 90:10, 1.0 mL / min, 254 nm)  $t_R$  (major) = 11.7 min,  $t_R$  (minor) = 15.7 min.

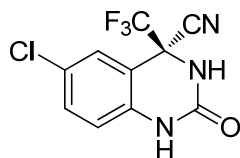

(*R*)-**6-chloro-2-oxo-4-(trifluoromethyl)-1,2,3,4-tetrahydroquinazoline-4-carbonitrile (3k)**

25 mg, white solid, mp 168–170 °C, 93% yield, 94% ee,  $[\alpha]_D^{25} -18.0$  ( $c$  0.5,  $CH_2Cl_2$ ),  **$^1H$  NMR** (400 MHz,  $d_6$ -DMSO)  $\delta$  10.32 (s, 1H), 9.43 (s, 1H), 7.53 (dd,  $J$  = 8.6, 1.9 Hz, 1H), 7.46 (s, 1H), 7.02 (d,  $J$  = 8.7 Hz, 1H).  **$^{19}F$  NMR** (376 MHz,  $d_6$ -DMSO)  $\delta$  -80.21 (s, 3F).  **$^{13}C$  NMR** (100 MHz,  $d_6$ -DMSO)  $\delta$  149.5, 136.8, 132.5, 126.4, 126.0, 122.1 (q,  $^1J_{F-C}$  = 287.9 Hz), 117.3, 113.5, 109.0, 59.1 (q,  $^2J_{F-C}$  = 33.5 Hz). **HRMS** (APCI) found:  $m/z$  276.0108  $[M+H]^+$ ; calcd. for  $C_{18}H_{12}F_5N_3O_2+H$  276.0073; **IR** (KBr):  $\nu$  3370, 3211, 3068, 2950, 1718, 1608, 1571, 1442, 1389, 1242, 1200, 1048, 952, 829, 742, 563, 458  $cm^{-1}$ ; **HPLC** (DAICEL Chiralpak IC, hexane / IPA = 90:10, 0.8 mL / min, 254 nm)  $t_R$  (major) = 6.8 min,  $t_R$  (minor) = 5.9 min.

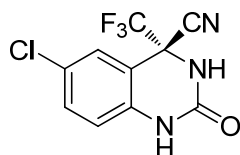

(*S*)-**3k**, 26 mg, white solid, mp 167–168 °C, 95% yield, 90% ee,  $[\alpha]_D^{25} +20.0$  (*c* 0.5, CH<sub>2</sub>Cl<sub>2</sub>), **HPLC** (DAICEL Chiralpak IC, hexane / IPA = 90:10, 0.8 mL / min, 254 nm) *t<sub>R</sub>* (major) = 5.9 min, *t<sub>R</sub>* (minor) = 6.8 min.

### 3. Procedures for the further transformations

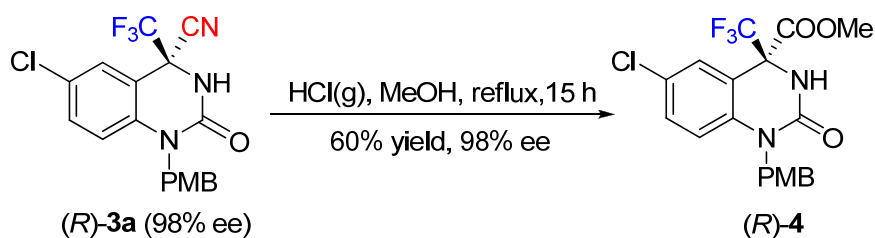

To a solution of **3a** (200 mg, 0.5 mmol) in dry methanol (20 mL) at 0 °C was added a saturated solution of dry HCl in methanol (10 mL). The mixture was refluxed for 15 hours and concentrated under reduced pressure. The crude mixture was treated with a saturated aqueous solution of NaHCO<sub>3</sub> (30 mL), and the aqueous layer was extracted with EtOAc (3 × 10 mL). The combined organic extracts were washed with brine, dried over Na<sub>2</sub>SO<sub>4</sub> and concentrated under reduced pressure. Purification by flash chromatography on silica gel (petroleum ether/ethyl acetate = 5:1) gave the product (*R*)-**4**. 129 mg, white solid, mp 131–132 °C, 60% yield, 98% ee,  $[\alpha]_D^{25} +29.2$  (*c* 0.5, CH<sub>2</sub>Cl<sub>2</sub>), **<sup>1</sup>H NMR** (400 MHz, CDCl<sub>3</sub>) δ 7.67 (s, 1H), 7.23 (dd, *J* = 8.9, 2.2 Hz, 1H), 7.15 (d, *J* = 8.5 Hz, 2H), 6.83 (dd, *J* = 11.7, 8.8 Hz, 3H), 6.64 (d, *J* = 32.4 Hz, 1H), 5.17 (d, *J* = 16.4 Hz, 1H), 5.02 (d, *J* = 16.4 Hz, 1H), 3.94 (s, 3H), 3.77 (s, 3H). **<sup>19</sup>F NMR** (376 MHz, CDCl<sub>3</sub>) δ -77.50 (s, 3F). **<sup>13</sup>C NMR** (100 MHz, CDCl<sub>3</sub>) δ 165.5, 159.1, 151.5, 136.9, 131.2, 128.0, 127.8, 123.3 (q, <sup>1</sup>*J*<sub>F-C</sub> = 286.7 Hz), 116.6, 114.5, 113.7, 65.6 (q, <sup>2</sup>*J*<sub>F-C</sub> = 29.8 Hz), 55.4, 54.6, 45.8. **HRMS** (ESI) found: *m/z* 451.0601 [M+Na]<sup>+</sup>; calcd. for C<sub>19</sub>H<sub>16</sub>ClF<sub>3</sub>N<sub>2</sub>O<sub>4</sub>+Na 451.0751; **IR** (KBr): ν 3276, 2957, 2933, 1760, 1692, 1511, 1426, 1249, 1200, 1034, 819, 567 cm<sup>-1</sup>; **HPLC** (DAICEL Chiralpak IC, hexane / IPA = 80:20, 1.0 mL / min, 254 nm) *t<sub>R</sub>* (major) = 14.3 min, *t<sub>R</sub>* (minor) = 9.5 min.

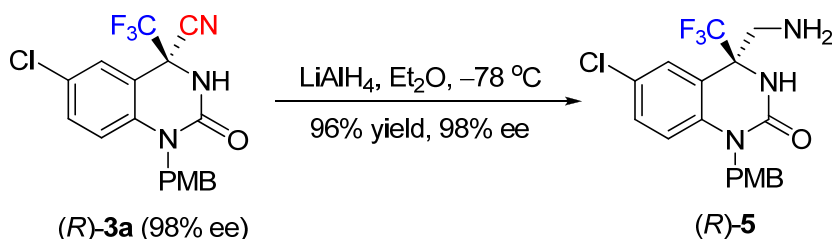

To a solution of **3a** (79 mg, 0.2 mmol) in dry diethyl ether (10 mL) was added  $\text{LiAlH}_4$  (32 mg, 0.4 mmol, 4.0 equiv.) at 0 °C. The mixture was stirred for 24 h at room temperature, and the reaction mixture was hydrolyzed by successive addition of water (1 mL). The resulting precipitate was filtered on Celite. The organic layer was dried over  $\text{Na}_2\text{SO}_4$  and concentrated under reduced pressure. The crude was purified by column chromatography on silica gel to give the product  $(R)\text{-5}$ . 66 mg, white solid, mp 80–81 °C, 96% yield, 98% ee,  $[\alpha]_{\text{D}}^{25} -24.6$  ( $c$  1.0,  $\text{CH}_2\text{Cl}_2$ ),  $^1\text{H NMR}$  (400 MHz,  $\text{CDCl}_3$ )  $\delta$  7.34 (s, 1H), 7.18 (dd,  $J$  = 15.9, 7.0 Hz, 4H), 6.87 – 6.78 (m, 3H), 5.21 (d,  $J$  = 15.6 Hz, 1H), 4.98 (d,  $J$  = 15.9 Hz, 1H), 3.76 (s, 3H), 3.40 (d,  $J$  = 13.7 Hz, 1H), 3.28 (d,  $J$  = 12.9 Hz, 1H), 1.46 (s, 2H).  $^{19}\text{F NMR}$  (376 MHz,  $\text{CDCl}_3$ )  $\delta$  –79.38 (s, 3F).  $^{13}\text{C NMR}$  (100 MHz,  $\text{CDCl}_3$ )  $\delta$  159.0, 153.6, 138.1, 130.4, 128.4, 128.0, 127.7, 126.3, 125.3 (q,  $^1J_{\text{F-C}}$  = 287.4 Hz), 117.7, 116.5, 114.4, 62.5 (q,  $^2J_{\text{F-C}}$  = 27.0 Hz), 55.4, 45.6, 45.0. **HRMS** (ESI) found:  $m/z$  400.1005  $[\text{M}+\text{H}]^+$ ; calcd. for  $\text{C}_{18}\text{H}_{17}\text{ClF}_3\text{N}_3\text{O}_2+\text{H}$  400.0961; **IR** (KBr):  $\nu$  3232, 3116, 2957, 1683, 1510, 1433, 1251, 1172, 1031, 816, 555, 422  $\text{cm}^{-1}$ ; **HPLC** (DAICEL Chiralpak IC, hexane / IPA = 80:20, 1.0 mL / min, 254 nm)  $t_{\text{R}}$  (major) = 49.9 min,  $t_{\text{R}}$  (minor) = 21.6 min.

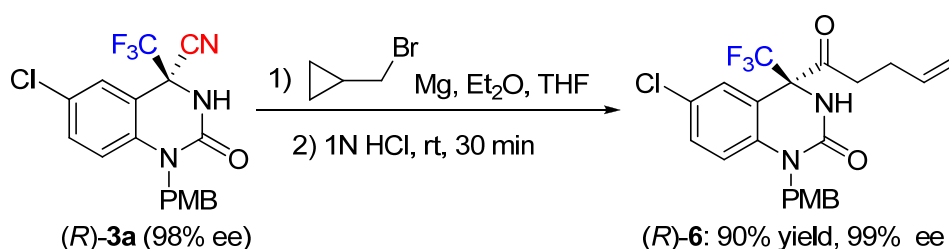

To a solution of **3a** (200 mg, 0.5 mmol) in dry  $\text{Et}_2\text{O}$  (10 mL) and dry THF (2.5 mL) was added dropwise a solution of (cyclopropylmethyl)magnesium bromide (3.0 M in ether, 1.0 mL, 2.25 mmol, 4.5 eq.) in diethyl ether at 0 °C slowly. The resulting suspension was stirred at 0 °C for an additional 1 hour and then at room temperature for 4 hours. The mixture was cooled to 0 °C and slowly added an aqueous solution of

1M HCl (30 mL). The mixture was vigorously stirred at room temperature for 30 min, and then extracted with ethyl acetate (3 × 20 mL). The extracts were washed with 5% NaHCO<sub>3</sub>, brine, dried over Na<sub>2</sub>SO<sub>4</sub> and concentrated. The residue was subjected to column chromatography on silica gel (petroleum ether / ethyl acetate = 5:1) to give the product (*R*)-**6**. 200 mg, white solid, mp 156–157 °C, 90% yield, 99% ee, [ $\alpha$ ]<sub>D</sub><sup>25</sup> +120.0 (*c* 1.0, CH<sub>2</sub>Cl<sub>2</sub>), <sup>1</sup>H NMR (400 MHz, CDCl<sub>3</sub>)  $\delta$  8.56 (d, *J* = 5.8 Hz, 1H), 7.26 (dd, *J* = 8.9, 2.3 Hz, 1H), 7.19 (d, *J* = 8.5 Hz, 2H), 7.15 (s, 1H), 6.90 (t, *J* = 7.9 Hz, 3H), 5.72 – 5.62 (m, 1H), 5.26 (d, *J* = 16.2 Hz, 1H), 5.01 – 4.95 (m, 3H), 3.80 (s, 3H), 3.01 – 2.93 (m, 1H), 2.74 – 2.66 (m, 1H), 2.38 – 2.29 (m, 2H). <sup>19</sup>F NMR (376 MHz, CDCl<sub>3</sub>)  $\delta$  –76.39 (d, *J* = 10.9 Hz, 3F). <sup>13</sup>C NMR (100 MHz, CDCl<sub>3</sub>)  $\delta$  200.2, 159.2, 153.4, 137.1, 136.1, 131.3, 128.4, 127.9, 127.8, 127.5, 123.6 (q, <sup>1</sup>*J*<sub>F-C</sub> = 286.6 Hz), 117.0, 116.1, 114.5, 113.6, 69.1 (q, <sup>2</sup>*J*<sub>F-C</sub> = 26.9 Hz), 55.4, 45.6, 37.7, 27.5. HRMS (APCI) found: *m/z* 451.1232 [M–H]<sup>–</sup>; calcd. for C<sub>22</sub>H<sub>20</sub>ClF<sub>3</sub>N<sub>2</sub>O<sub>3</sub>–H 451.1115; IR (KBr):  $\nu$  3203, 3078, 2936, 1732, 1687, 1512, 1425, 1393, 1200, 1032, 919, 811, 561, 510 cm<sup>–1</sup>; HPLC (DAICEL Chiralpak IC, hexane / IPA = 90:10, 1.0 mL / min, 254 nm) *t*<sub>R</sub> (major) = 6.4 min, *t*<sub>R</sub> (minor) = 9.2 min.

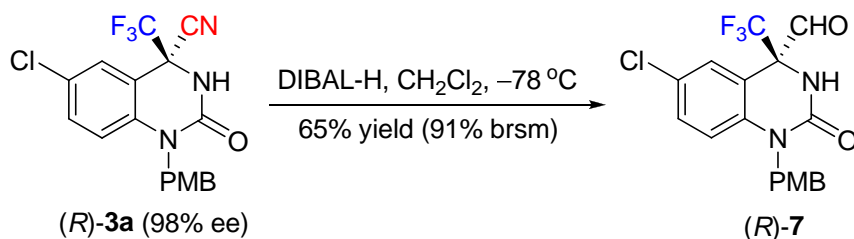

To a well-stirred solution of the **3a** (0.25 mmol) in dry dichloromethane (3 mL) under argon atmosphere was added DIBAL-H (2.0 equiv., 1.2 M in toluene) and stirred overnight at –78 °C. The reaction was then quenched after 1 hour of further stirring by slow addition of 2M HCl and ethyl acetate. The organic phase was washed with brine, dried over sodium sulfate and concentrated. The crude was then purified by column chromatography on silica gel (petroleum ether / ethyl acetate = 10:1 to 2:1) to give the corresponding aldehyde **7** and recovered **3a** as well. 65 mg, white solid, mp 76–77 °C, 65% yield (91% brsm), [ $\alpha$ ]<sub>D</sub><sup>25</sup> –23.4 (*c* 1.0, CH<sub>2</sub>Cl<sub>2</sub>), <sup>1</sup>H NMR (400 MHz, CDCl<sub>3</sub>)  $\delta$  9.70 (s, 1H), 7.39 (s, 1H), 7.34 (s, 1H), 7.13 (dd, *J* = 14.5, 8.9 Hz, 3H), 6.86 (t, *J* = 9.5

Hz, 3H), 5.18 (d,  $J = 16.4$  Hz, 1H), 5.01 (d,  $J = 16.4$  Hz, 1H), 3.77 (s, 3H).  $^{19}\text{F}$  NMR (376 MHz,  $\text{CDCl}_3$ )  $\delta$  -76.37 (s, 3F).  $^{13}\text{C}$  NMR (100 MHz,  $\text{CDCl}_3$ )  $\delta$  188.6, 159.2, 152.4, 137.4, 131.5, 128.4, 127.8, 127.8, 127.2, 123.1 (q,  $^1J_{\text{F-C}} = 286.8$  Hz), 117.2, 114.6, 112.1, 67.2 (q,  $^2J_{\text{F-C}} = 28.2$  Hz), 55.4, 45.8. HRMS (ESI) found:  $m/z$  397.0442  $[\text{M-H}]^-$ ; calcd. for  $\text{C}_{18}\text{H}_{14}\text{ClF}_3\text{N}_2\text{O}_3\text{-H}$  397.0645; IR (KBr):  $\nu$  3288, 2934, 1674, 1511, 1571, 1435, 1249, 1183, 1032, 813, 743, 561  $\text{cm}^{-1}$ .

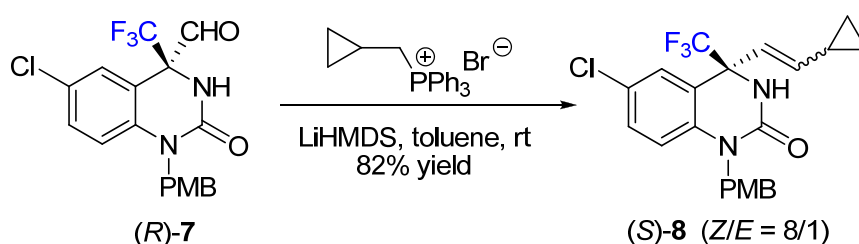

LiHMDS (1.0 M in THF, 0.4 mmol) was added dropwise to a suspension of (cyclopropylmethyl)triphenylphosphonium bromide (0.3 mmol) in anhydrous toluene (2.5 mL) under argon atmosphere, and the resulting mixture was stirred at rt for 15 min. A solution of **7** (80 mg, 0.2 mmol) in anhydrous toluene (1.5 mL) was added and the resulting mixture was stirred at rt for 1 h. The reaction was quenched with 1M HCl (10 mL), and the aqueous layer was extracted with ethyl acetate. The combined organic extracts were dried by  $\text{MgSO}_4$  and concentrated. Column chromatography (petroleum ether / ethyl acetate = 10/1) afforded **8a** and **8b** (62 mg + 8 mg, 82% yield;  $Z/E = 8/1$ , determined by  $^{19}\text{F}$ -NMR of the crude product).

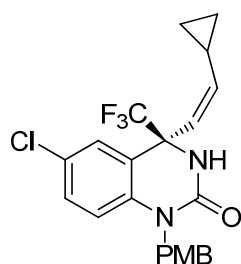

**(S,Z)-6-chloro-4-(2-cyclopropylvinyl)-1-(4-methoxybenzyl)-4-(trifluoromethyl)-3,4-dihydroquinazolin-2(1H)-one (8a)**

62 mg, white solid, 73% yield, 99% ee,  $[\alpha]_{\text{D}}^{25} -35.7$  ( $c$  2.0,  $\text{CH}_2\text{Cl}_2$ ),  $^1\text{H}$  NMR (400 MHz,  $\text{CDCl}_3$ )  $\delta$  7.28 (s, 1H), 7.16 (d,  $J = 8.3$  Hz, 3H), 6.83 (d,  $J = 8.5$  Hz, 2H), 6.79 (d,  $J = 8.9$  Hz, 1H), 5.88 (d,  $J = 11.1$  Hz, 1H), 5.60 (s, 1H), 5.30 (dd,  $J = 13.4, 8.4$  Hz,

2H), 4.94 (d,  $J = 16.3$  Hz, 1H), 3.77 (s, 3H), 1.37 – 1.30 (m, 1H), 0.84 – 0.78 (m, 1H), 0.58 – 0.51 (m, 1H), 0.48 – 0.41 (m, 1H), 0.35 – 0.29 (m, 1H).  **$^{19}\text{F}$  NMR** (376 MHz,  $\text{CDCl}_3$ )  $\delta$  –82.89 (s, 3F).  **$^{13}\text{C}$  NMR** (100 MHz,  $\text{CDCl}_3$ )  $\delta$  159.0, 152.6, 145.8, 136.9, 130.2, 128.9, 128.5, 127.8, 127.8, 125.4 (q,  $^1J_{\text{F-C}} = 286.8$  Hz), 122.6, 120.3, 116.0, 114.4, 62.0 (q,  $^2J_{\text{F-C}} = 28.7$  Hz), 55.39, 45.65, 11.38, 8.23, 8.08. **HRMS** (ESI) found:  $m/z$  437.2030  $[\text{M}+\text{H}]^+$ ; calcd. for  $\text{C}_{22}\text{H}_{20}\text{ClF}_3\text{N}_2\text{O}_2+\text{H}$  437.1165; **HPLC** (DAICEL Chiralpak IC, hexane / IPA = 95:5, 1.0 mL / min, 254 nm)  $t_{\text{R}}$  (major) = 18.1 min,  $t_{\text{R}}$  (minor) = 20.3 min.

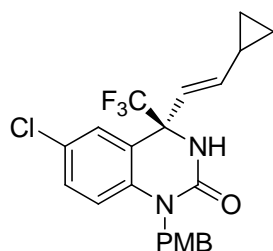

**(*S,E*)-6-chloro-4-(2-cyclopropylvinyl)-1-(4-methoxybenzyl)-4-(trifluoromethyl)-3,4-dihydroquinazolin-2(1*H*)-one (8b)**

8 mg, slight yellow solid, 9% yield, 98% ee,  $[\alpha]_{\text{D}}^{25} -28.6$  ( $c$  1.0,  $\text{CH}_2\text{Cl}_2$ ),  **$^1\text{H}$  NMR** (400 MHz,  $\text{CDCl}_3$ )  $\delta$  7.26 (s, 1H), 7.24 – 7.10 (m, 3H), 6.85 (d,  $J = 8.4$  Hz, 2H), 6.82 – 6.72 (m, 1H), 6.03 (d,  $J = 15.5$  Hz, 1H), 5.95 (s, 1H), 5.54 (dd,  $J = 15.3, 9.3$  Hz, 1H), 5.17 (d,  $J = 15.6$  Hz, 1H), 5.02 (d,  $J = 15.8$  Hz, 1H), 3.77 (s, 3H), 1.64 – 1.48 (m, 1H), 0.88 – 0.78 (m, 2H), 0.54 – 0.44 (m, 2H).  **$^{19}\text{F}$  NMR** (376 MHz,  $\text{CDCl}_3$ )  $\delta$  –80.55 (s, 3F). **HRMS** (ESI) found:  $m/z$  437.2030  $[\text{M}+\text{H}]^+$ ; calcd. for  $\text{C}_{22}\text{H}_{20}\text{ClF}_3\text{N}_2\text{O}_2+\text{H}$  437.1165; **HPLC** (DAICEL Chiralpak IB, hexane / IPA = 95:5, 1.0 mL / min, 254 nm)  $t_{\text{R}}$  (major) = 12.0 min,  $t_{\text{R}}$  (minor) = 10.0 min.

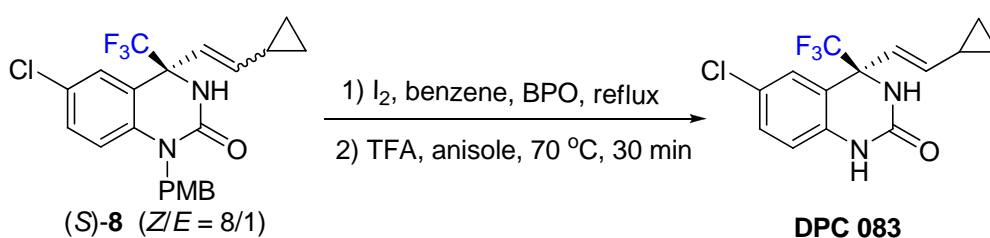



A mixture of **8** (100 mg, 0.23 mmol), iodine (115 mg, 4 portions, 2.0 equiv.), and BPO (55 mg, 4 portions, 1.0 equiv) in benzene (10 mL) was refluxed for 4 days. The reaction mixture was shaken with saturated sodium thiosulfate solution and the water layer was extracted with EtOAc. The combined organic extracts were dried over MgSO<sub>4</sub> and concentrated. The crude was separated by column chromatography on silica gel to yield the *trans*-isomer **8b** (70 mg).

To a solution of **8b** (70 mg, 0.16 mmol) in anisole (0.6 mL) was added TFA (3 mL). The reaction mixture was stirred at 70 °C for 30 min. Water was added and extracted with ethyl acetate. The combined organic extracts were washed with aqueous NaHCO<sub>3</sub> and brine, dried over Na<sub>2</sub>SO<sub>4</sub> and concentrated. The crude was then purified by column chromatography on silica gel to give the product DPC-083(42 mg): slight yellow solid, 60% yield (two steps), 98% ee,  $[\alpha]_{\text{D}}^{20} -22.0^{\circ}$  (*c* 0.40, CH<sub>3</sub>OH) { lit.<sup>4a</sup>:  $[\alpha]_{\text{D}}^{20} -22.5^{\circ}$  (*c* 0.40, CH<sub>3</sub>OH), > 99.9% ee; lit.<sup>4b</sup>:  $[\alpha]_{\text{D}}^{28} -19.8^{\circ}$  (*c* 0.40, CH<sub>3</sub>OH), 95% ee}; **<sup>1</sup>H NMR** (400 MHz, CDCl<sub>3</sub>) δ 9.41 (s, 1H), 7.24 (s, 1H), 7.20 (dd, *J* = 8.5, 2.1 Hz, 1H), 6.76 (d, *J* = 8.5 Hz, 1H), 6.01 (d, *J* = 15.5 Hz, 2H), 5.48 (dd, *J* = 15.4, 9.3 Hz, 1H), 1.56 – 1.49 (m, 1H), 0.86 – 0.76 (m, 2H), 0.52 – 0.40 (m, 2H). **<sup>19</sup>F NMR** (376 MHz, CDCl<sub>3</sub>) δ –80.59 (s, 3F). **HPLC** (DAICEL Chiralpak IC, hexane / IPA = 96:4, 0.6 mL / min, 254 nm) *t*<sub>R</sub> (major) = 21.1 min, *t*<sub>R</sub> (minor) = 17.0 min.

#### 4. References:

- [1] (a) J. W. Corbett, S. S. Ko, J. D. Rodgers, L. A. Gearhart, N. A. Magnus, L. T. Bacheler, S. Diamond, S. Jeffrey, R. M. Klabe, B. C. Cordova, S. Garber, K. Logue, G. L. Trainor, P. S. Anderson, S. K. Erickson-Viitanen, *J. Med. Chem.*, 2000, **43**, 2019; (b) N. A. Magnus, P. N. Confalone, L. Storace, M. Patel, C. C. Wood, W. P. Davis, R. L. Parsons, Jr. *J. Org. Chem.*, 2003, **68**, 754.
- [2] (a) K. Liu, H.-F. Cui, J. Nie, K.-Y. Dong, X.-J. Li and J.-A. Ma, *Org. Lett.*, 2007, **9**, 923; (b) X.-J. Li, K. Liu, H. Ma, J. Nie and J.-A. Ma, *Synlett*, 2008, 3242; (c) H.

Ma, K. Liu, F.-G. Zhang, C.-L. Zhu, J. Nie and J.-A. Ma, *J. Org. Chem.*, 2010, **75**, 1402.

[3] (a) J. Ye, D. J. Dixon and P. S. Hynes, *Chem. Commun.*, 2005, 4481; (b) B. Vakulya, S. Varga, A. Csámpai and T. Soós, *Org. Lett.*, 2005, **7**, 1967.

[4] (a) B. Jiang, J. J. Dong, Y. G. Si, X. L. Zhao, Z. G. Huang and M. Xu, *Adv. Synth. Catal.*, 2008, **350**, 1360; (b) H. Xie, Y. Zhang, S. Zhang, X. Chen and W. Wang, *Angew. Chem. Int. Ed.*, 2011, **50**, 11773.

## **NMR spectra of the addition products and related compounds**

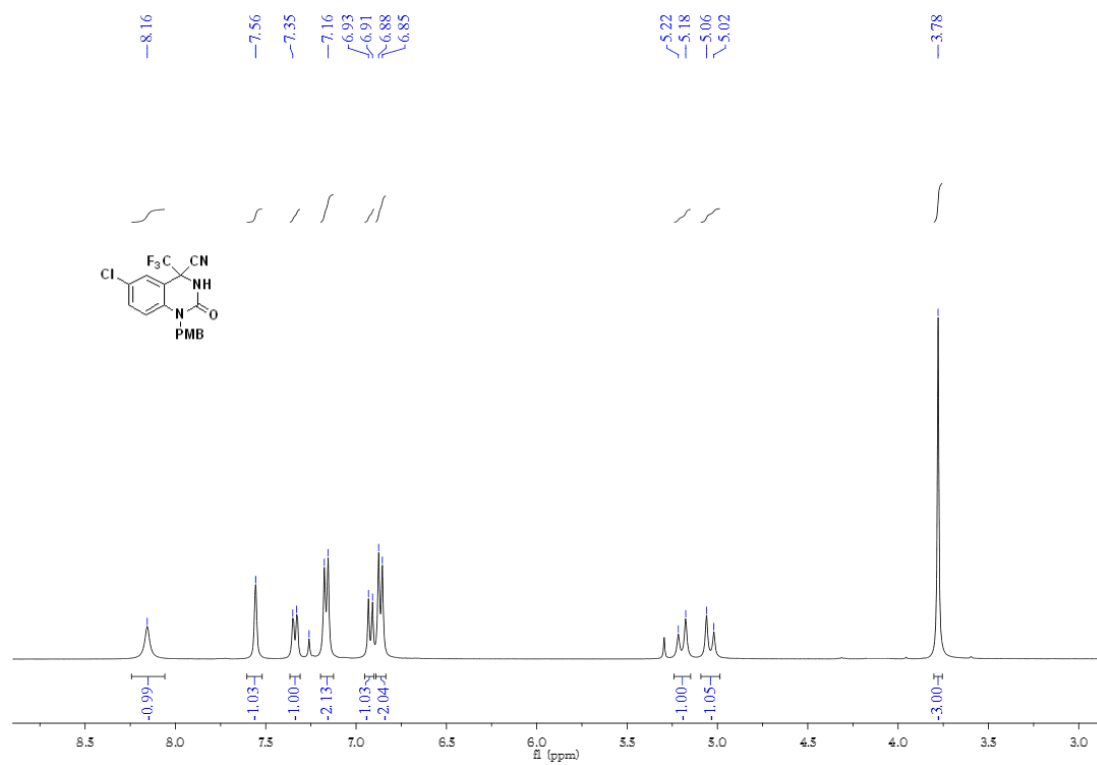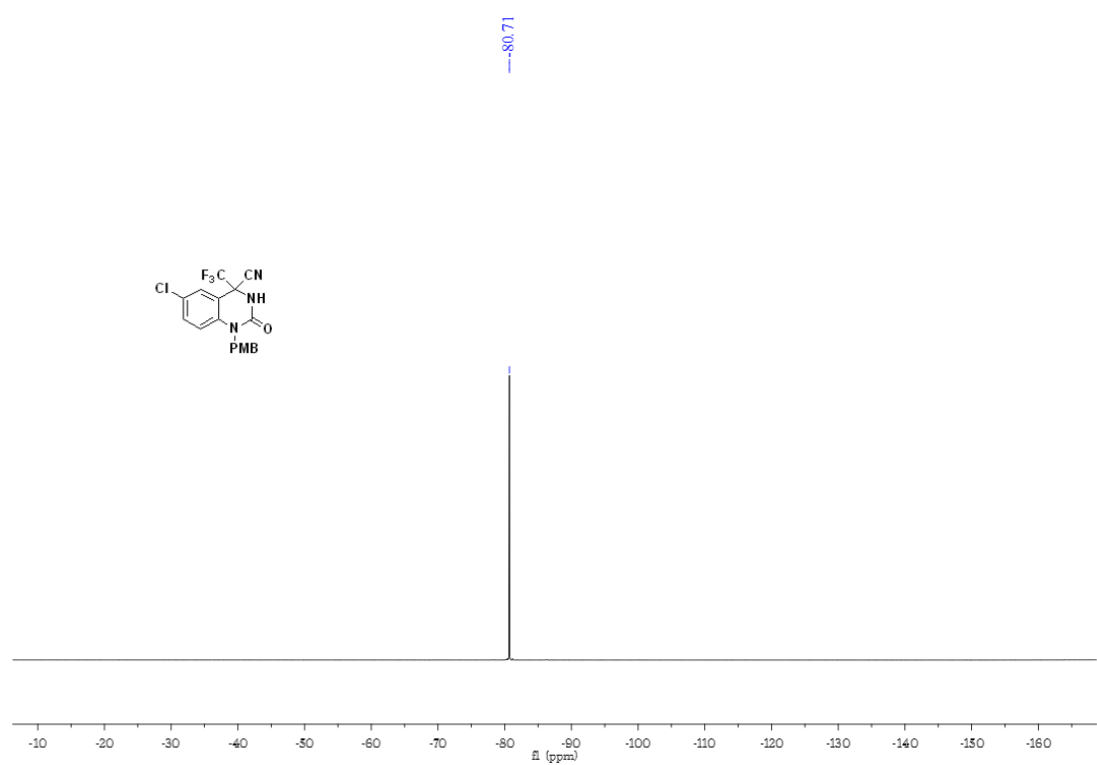

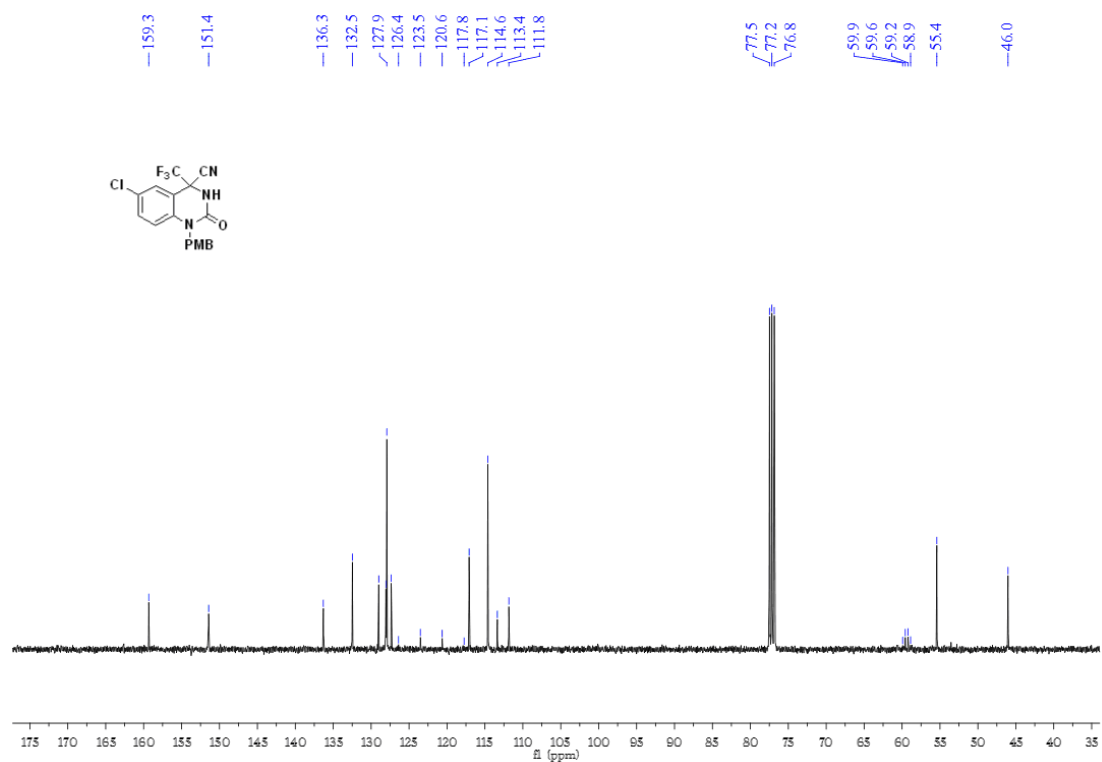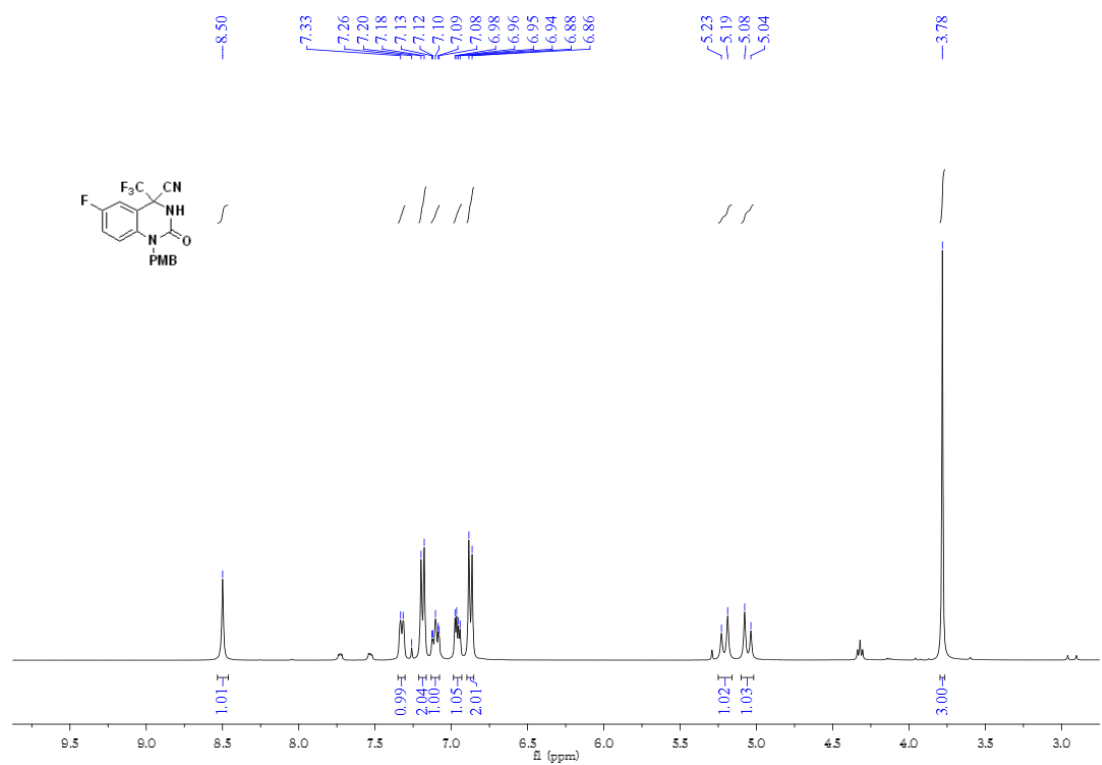

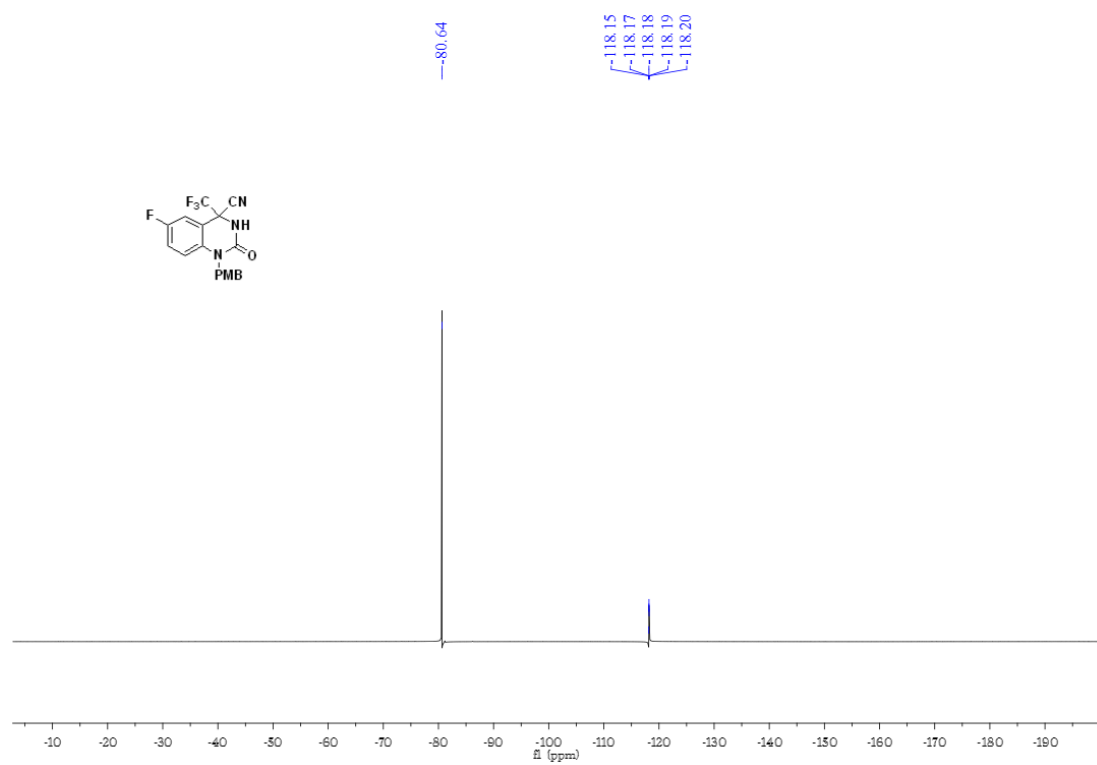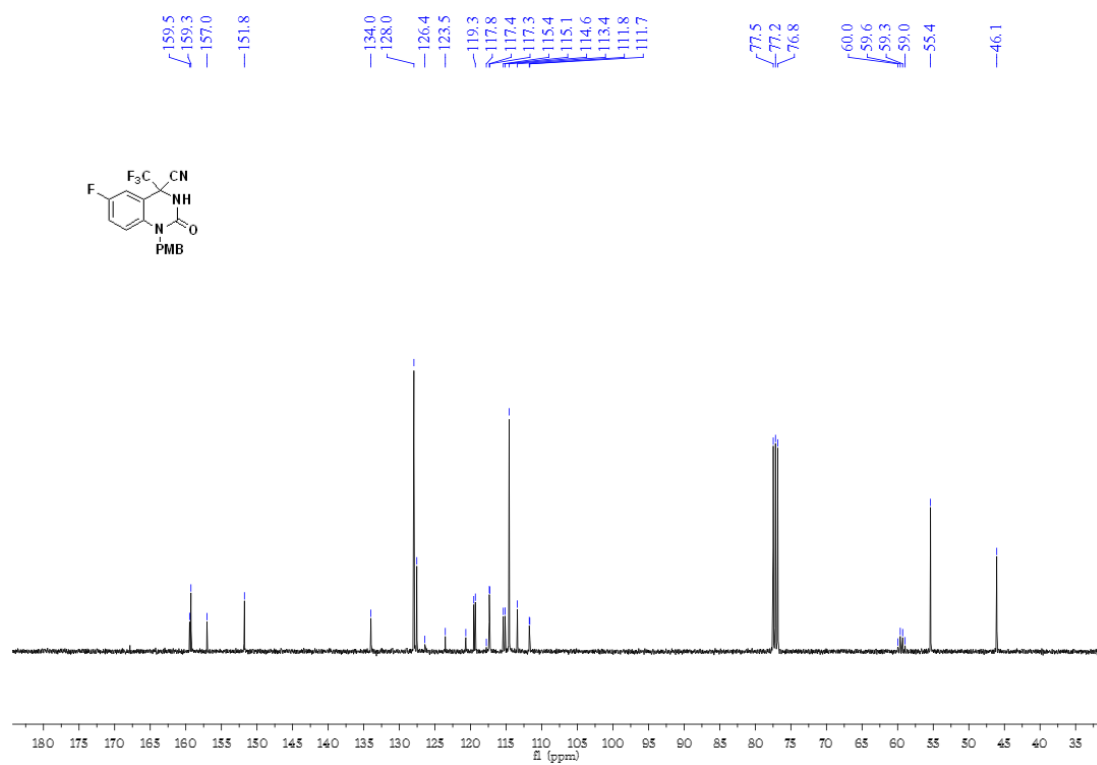

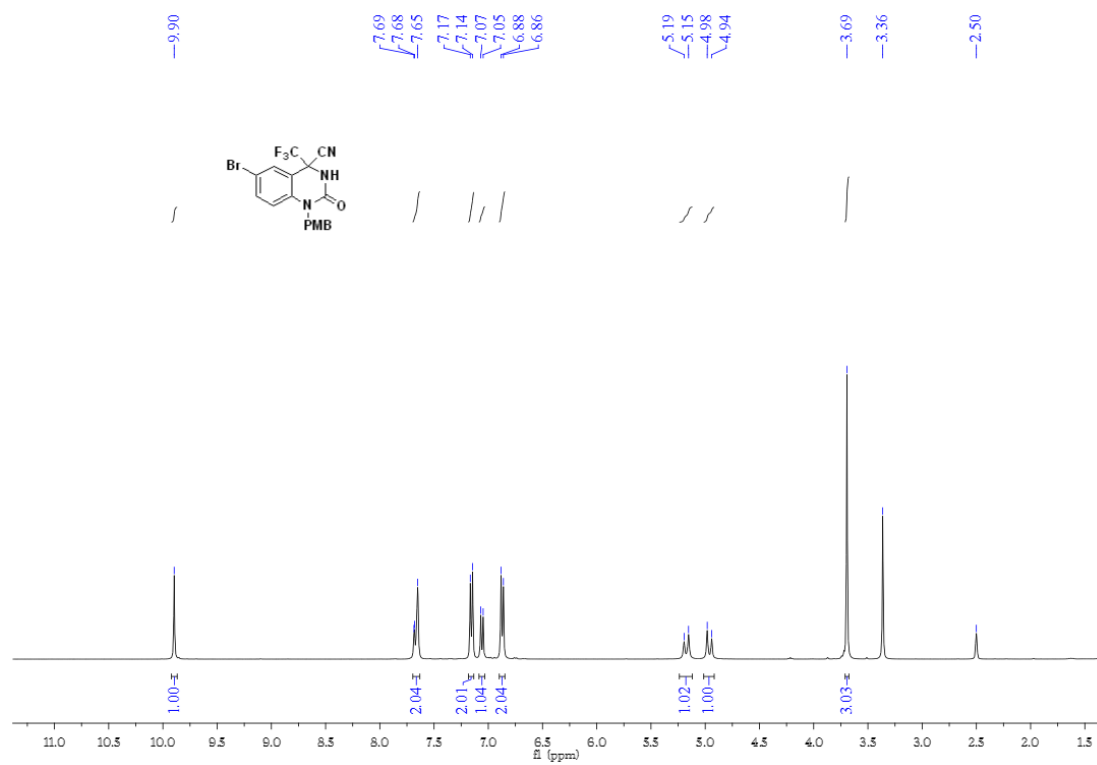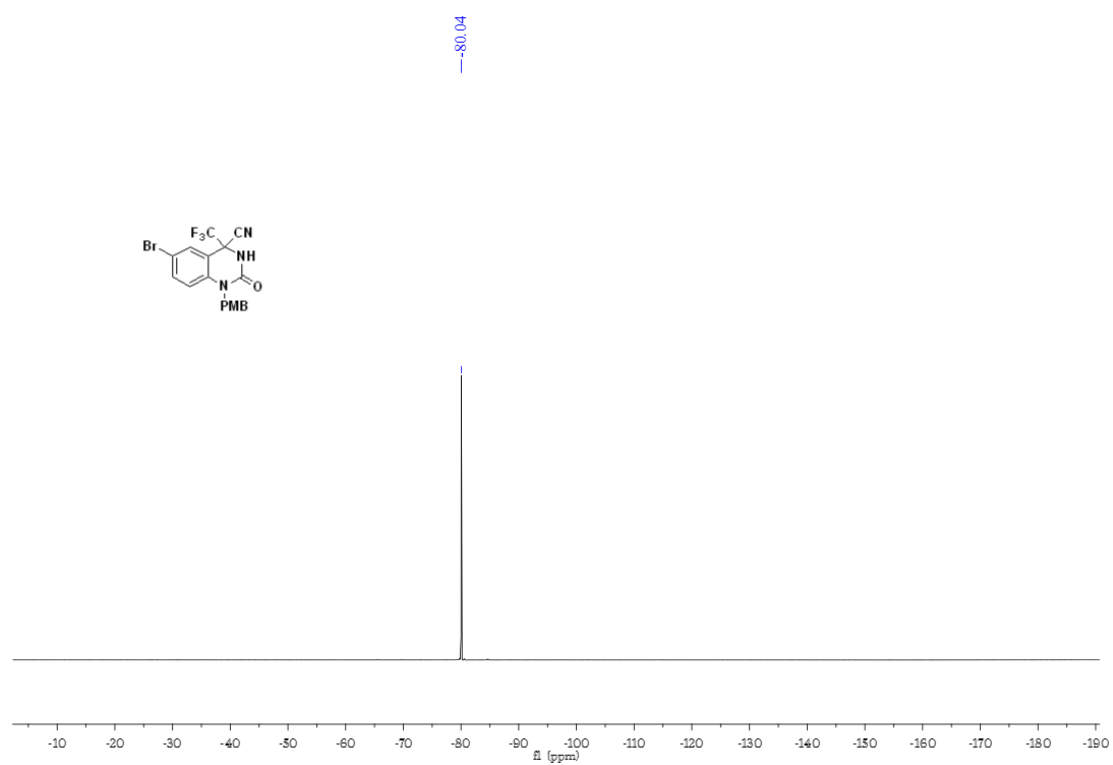

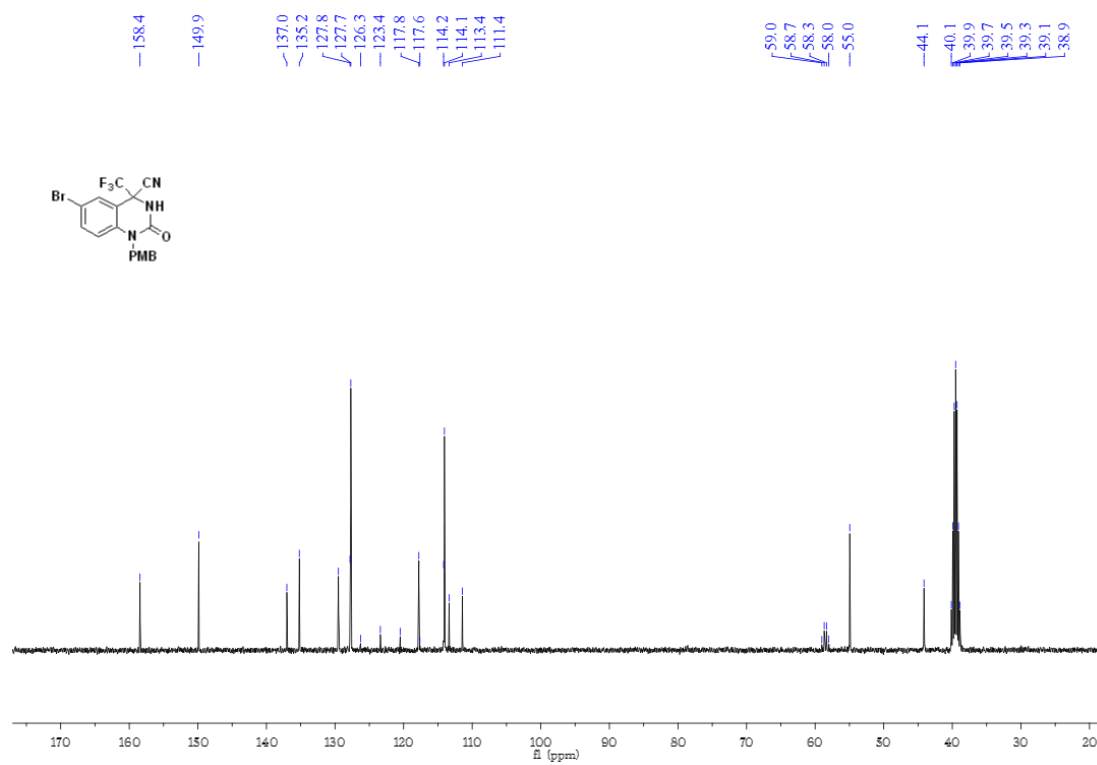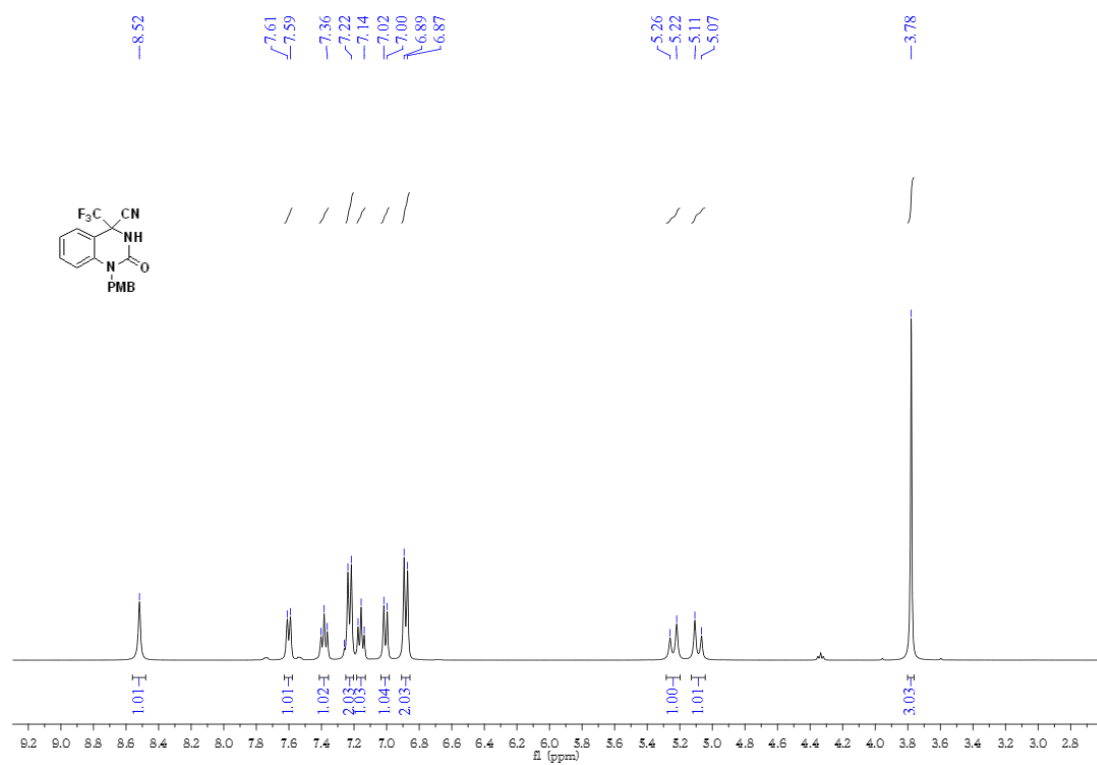

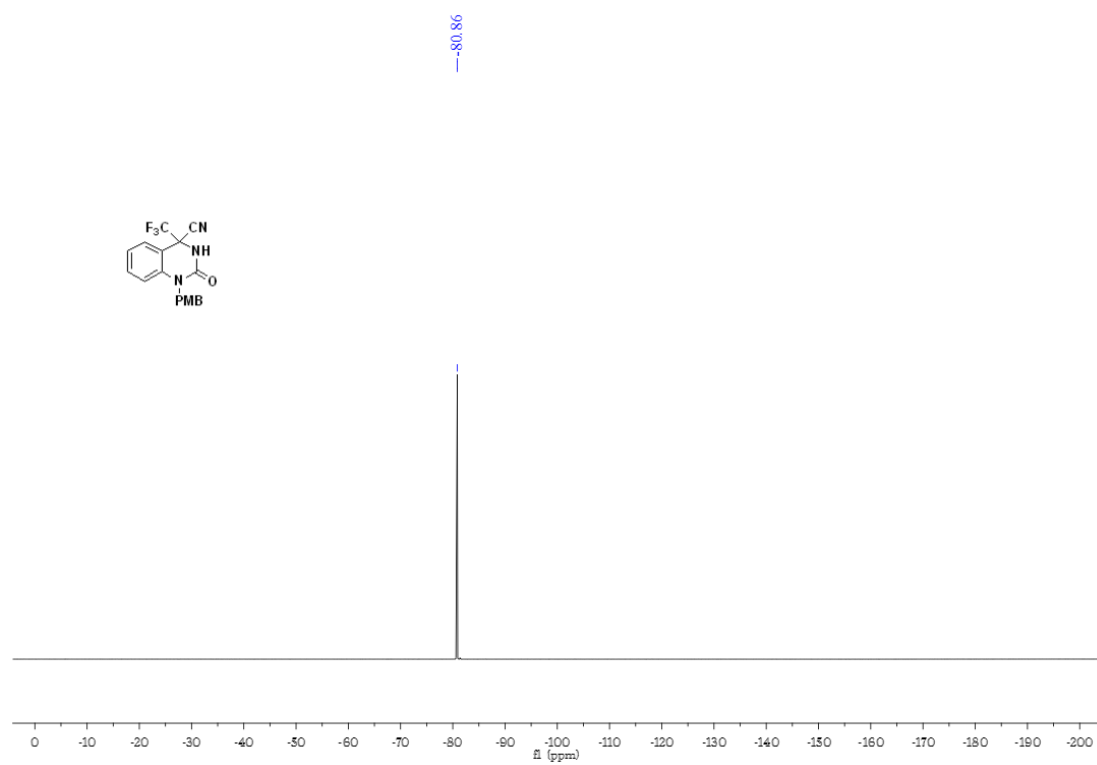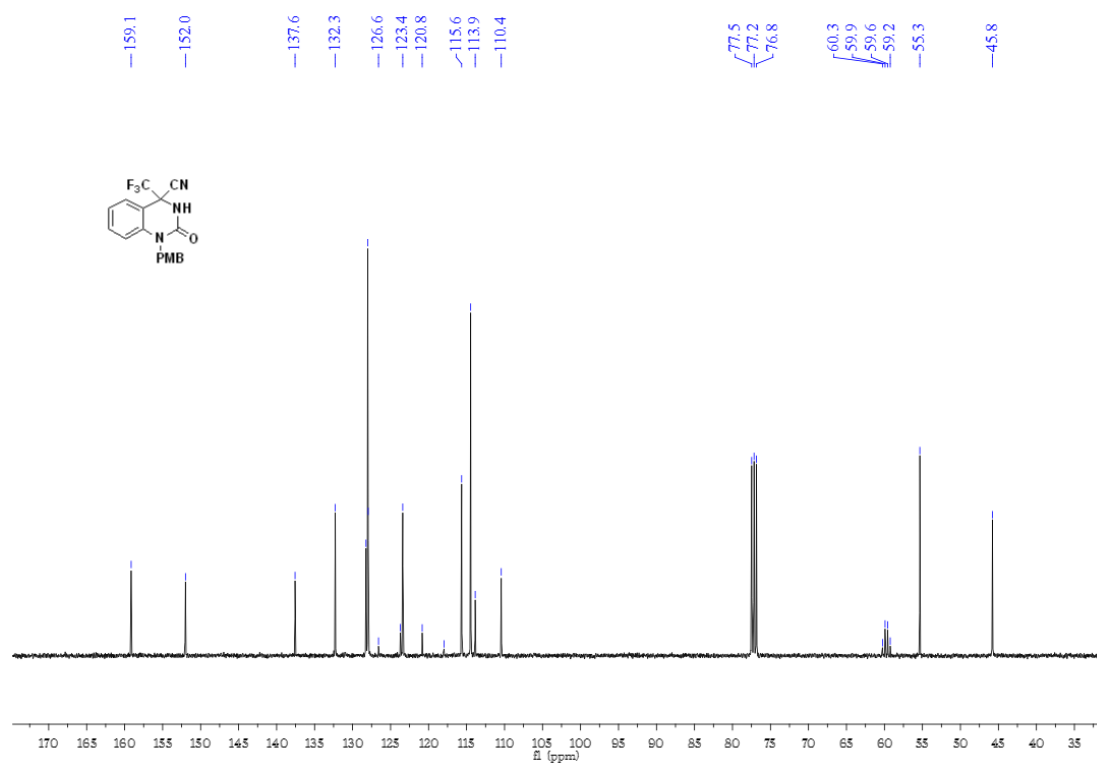



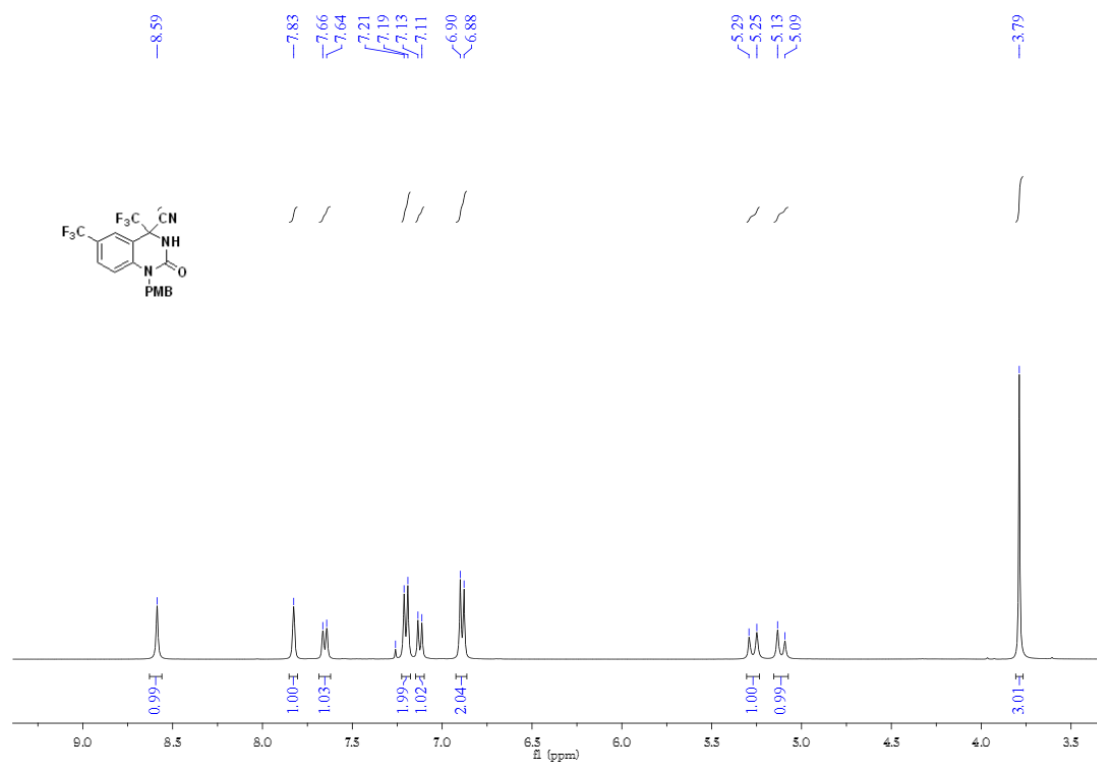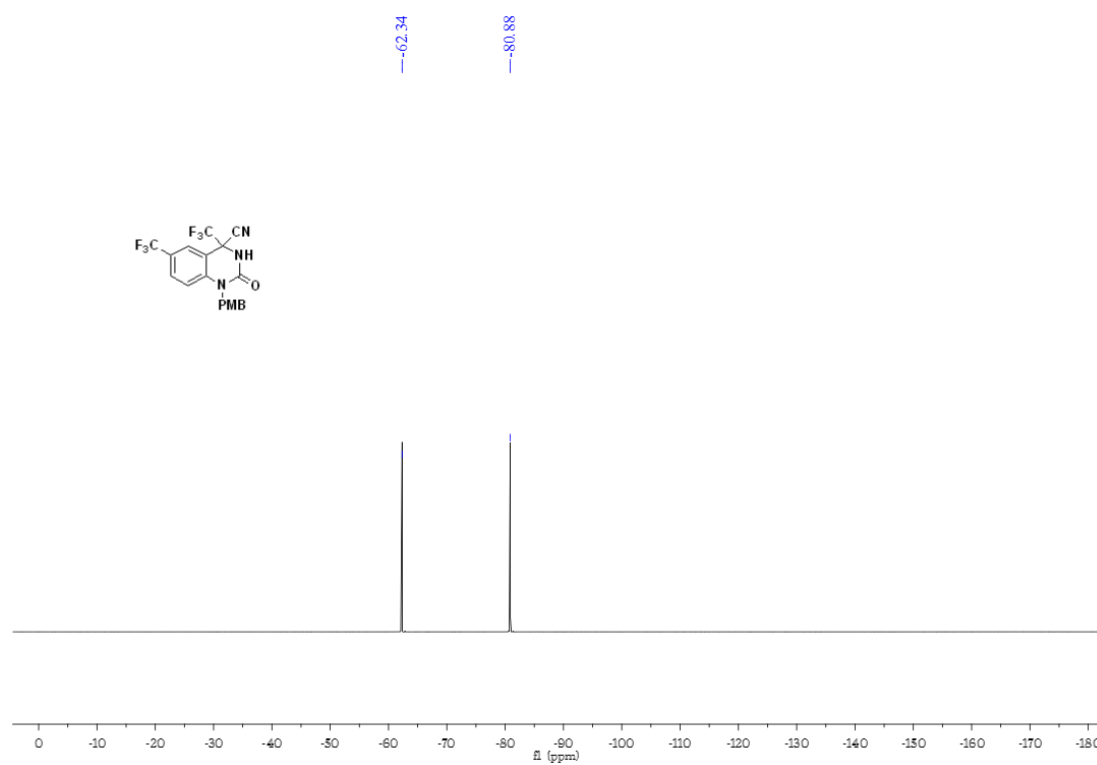

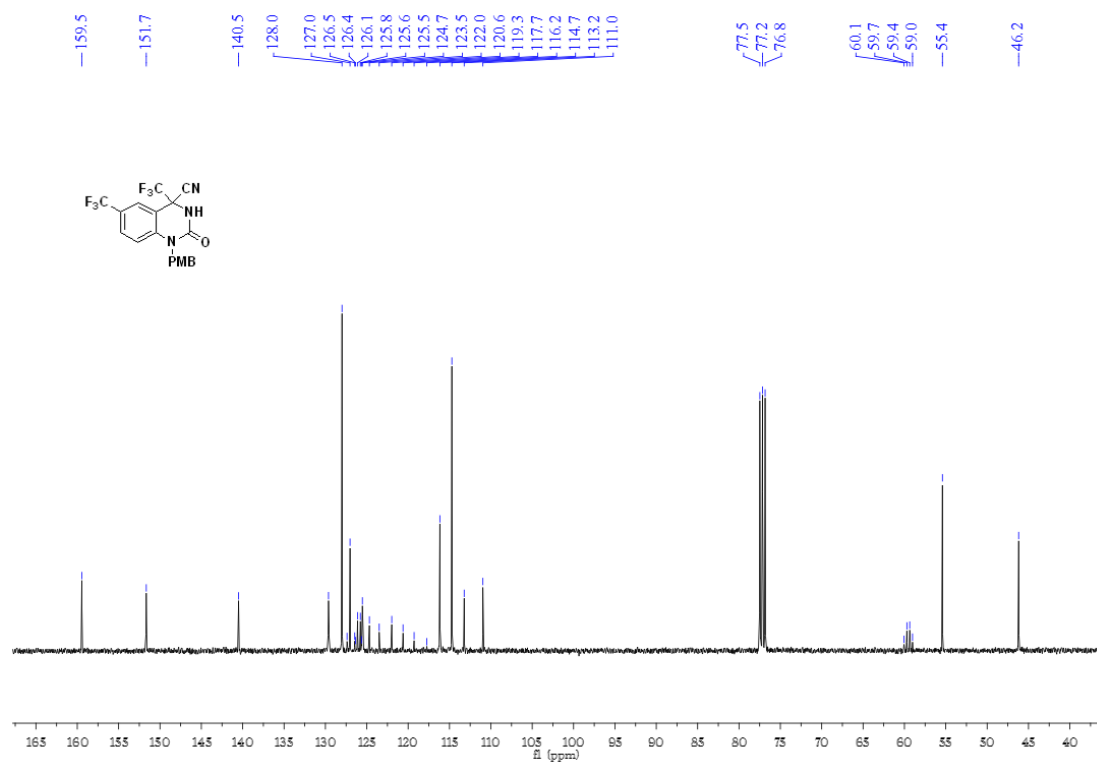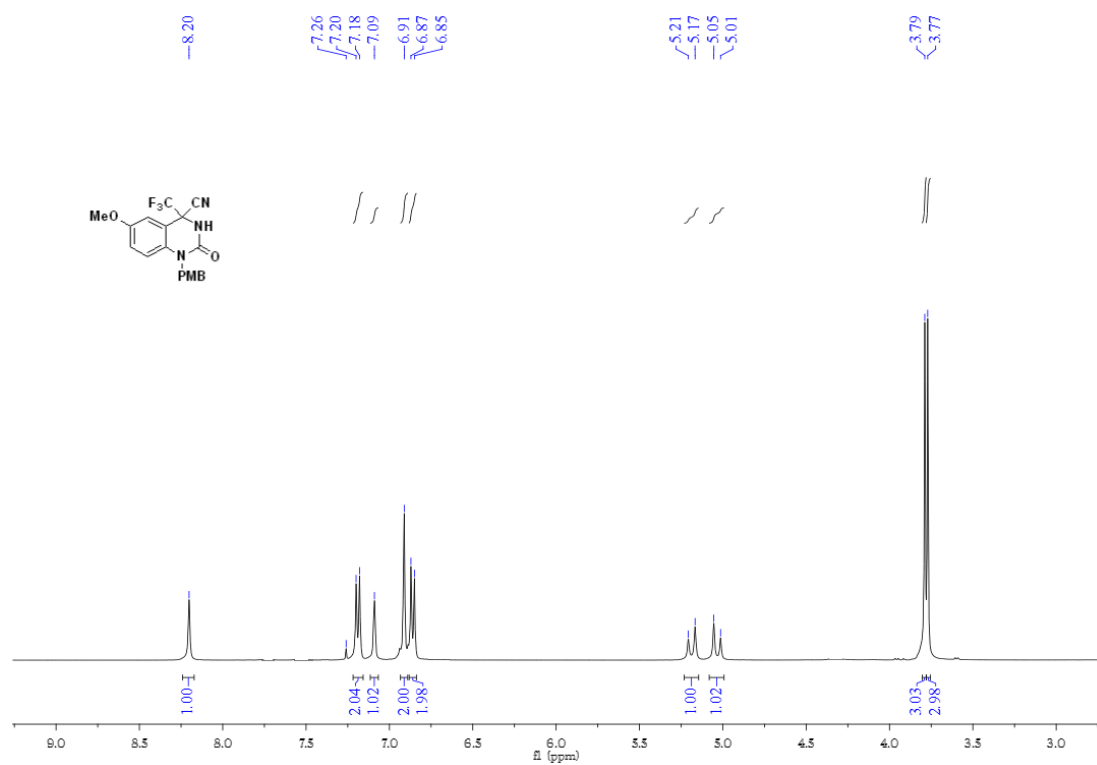

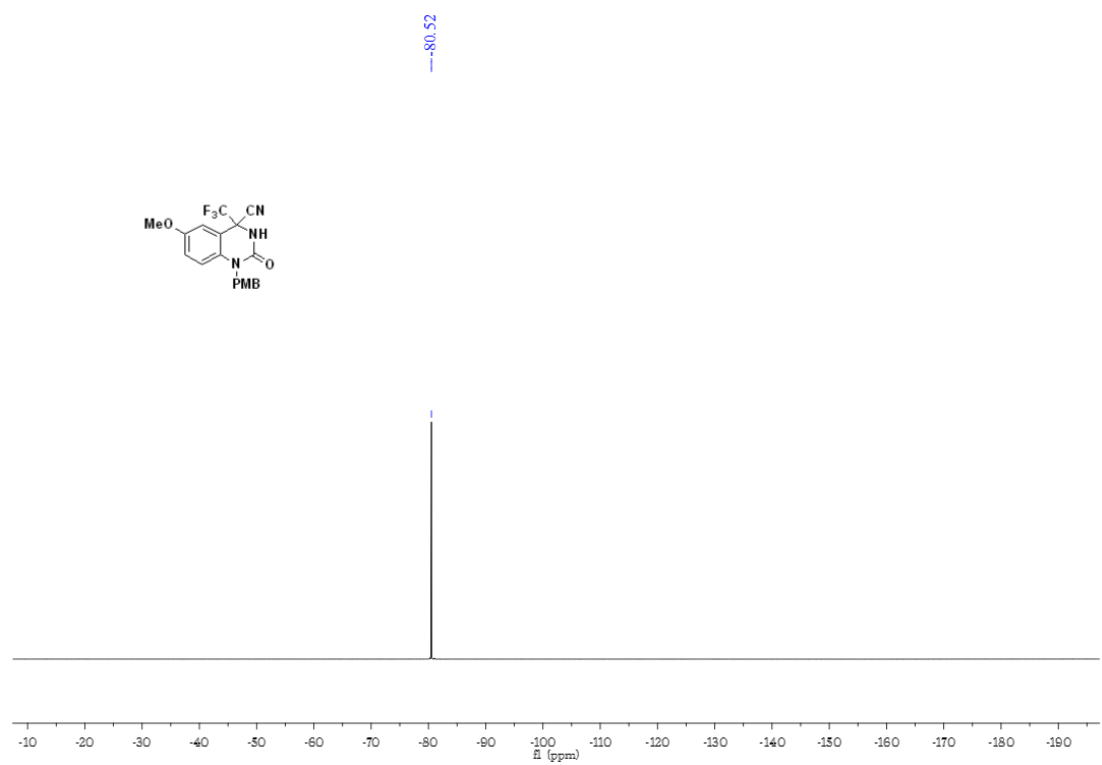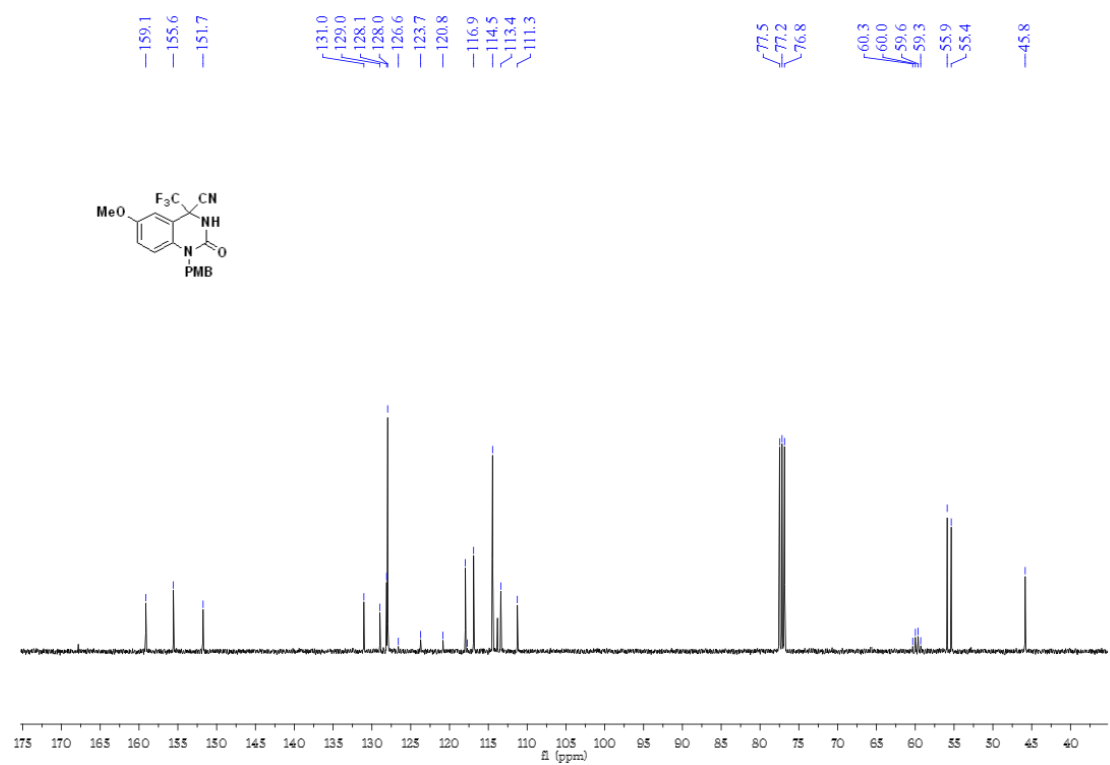

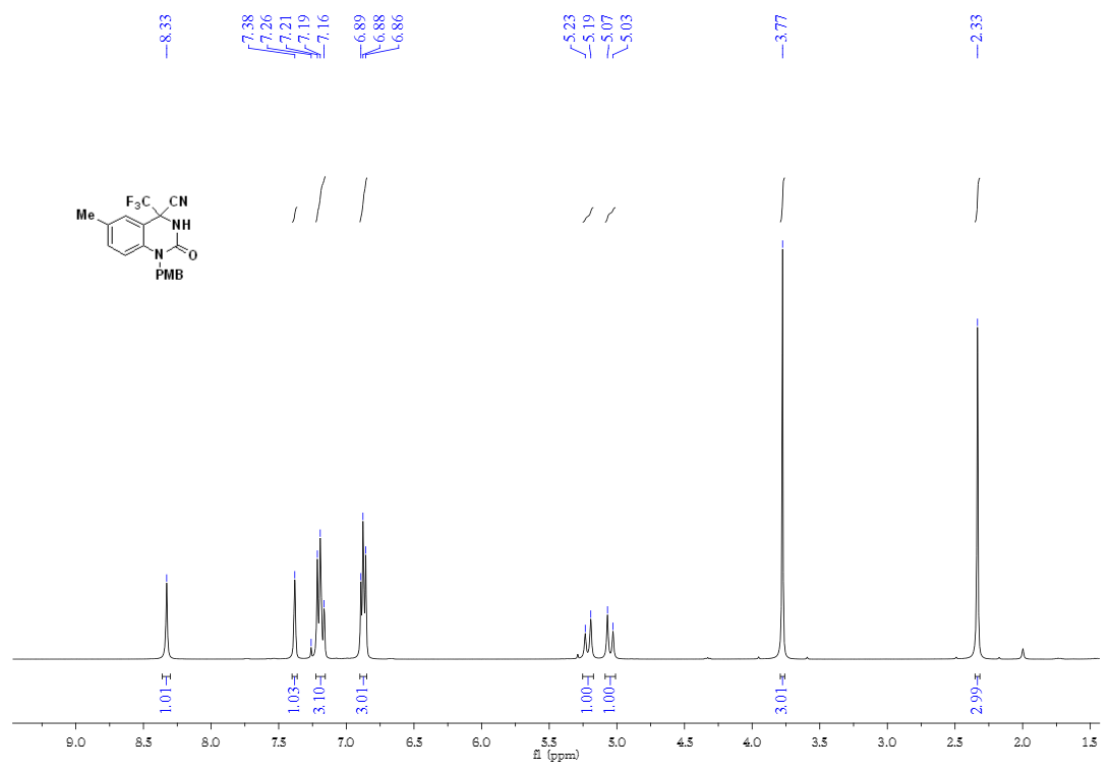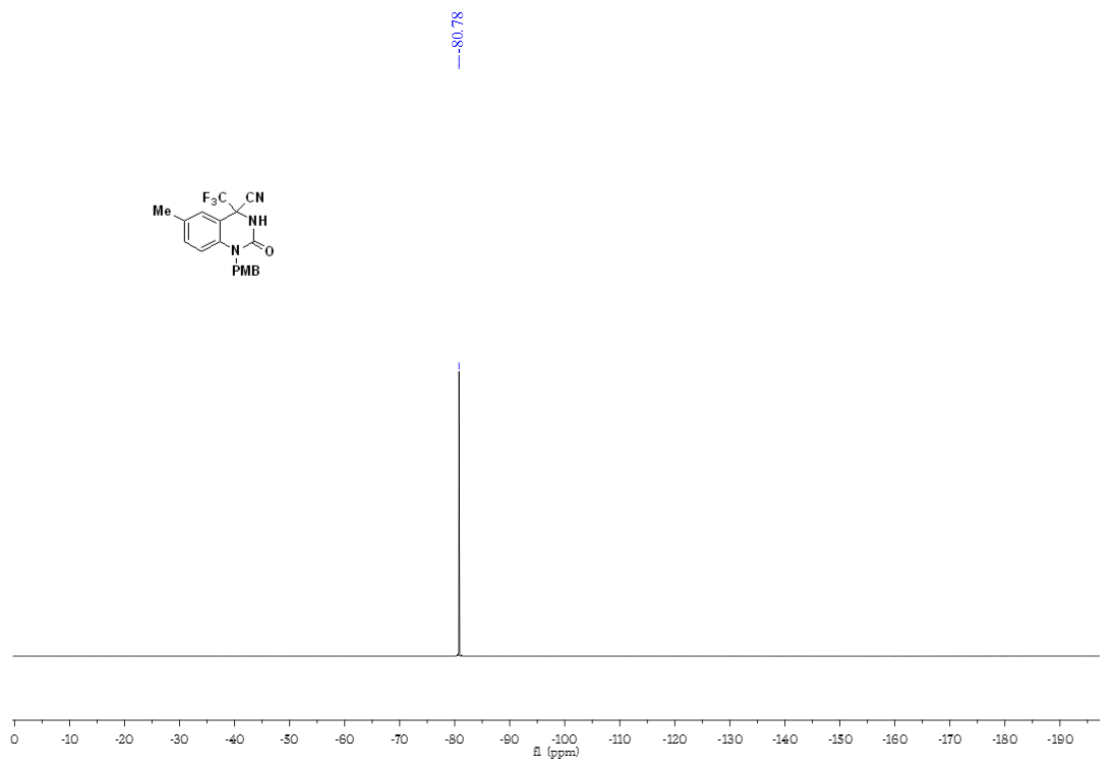

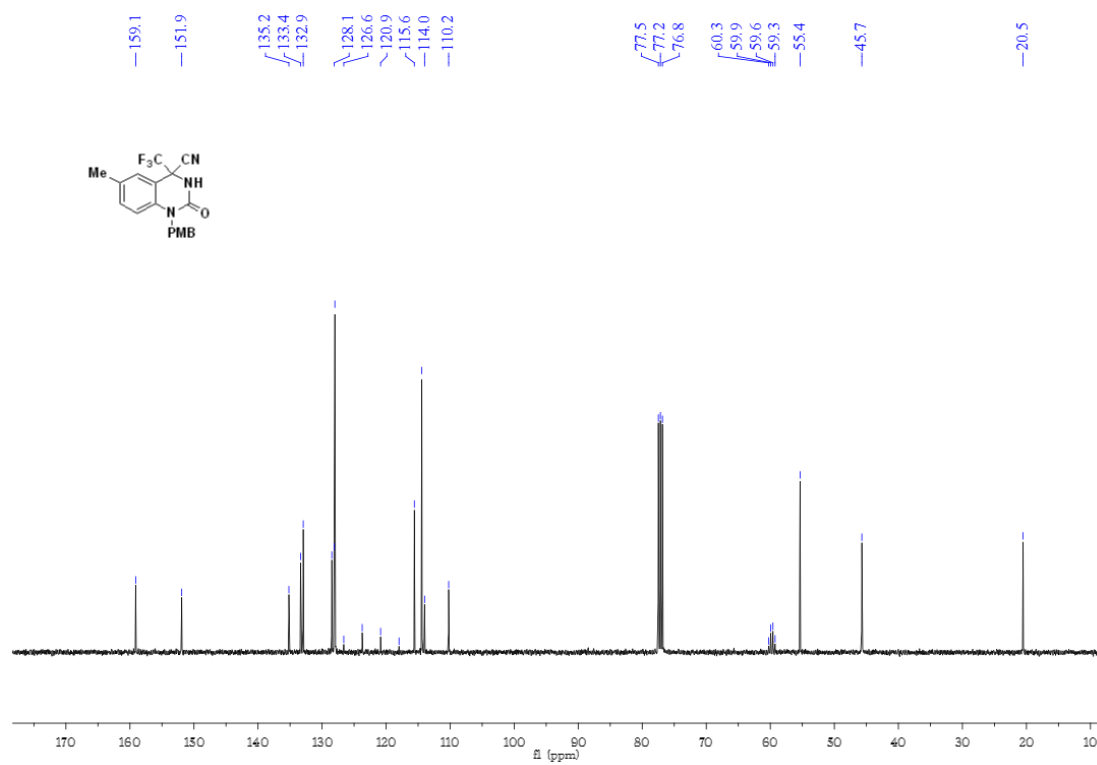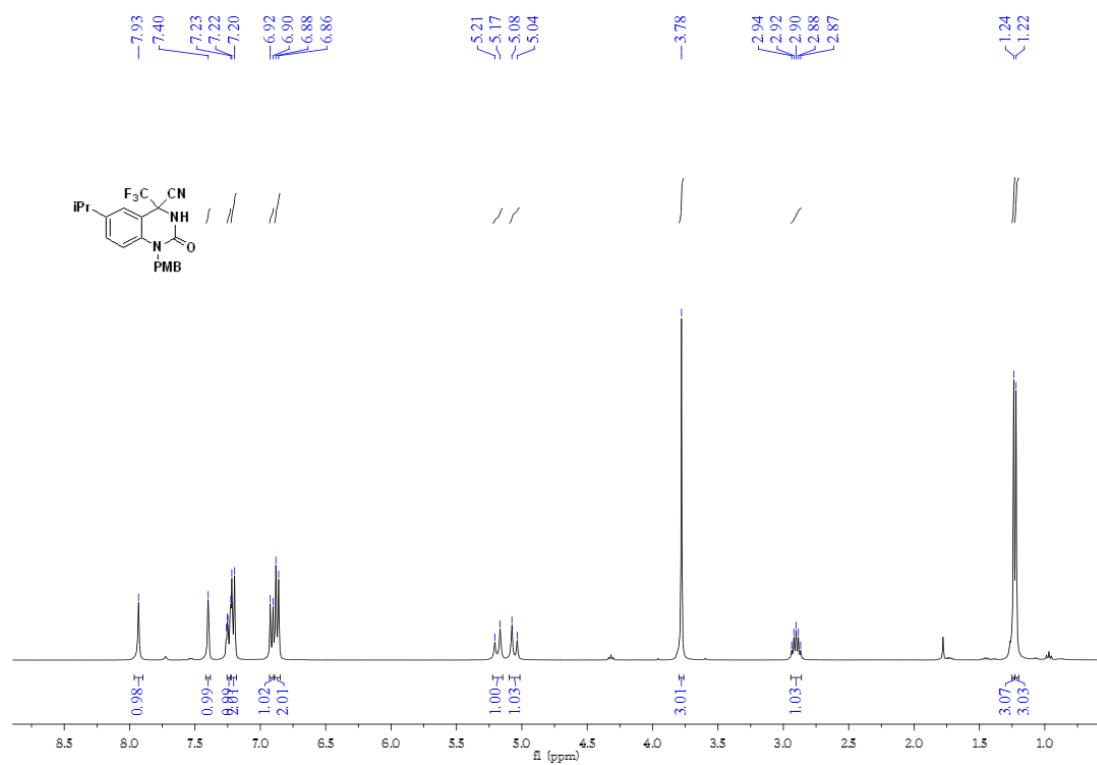

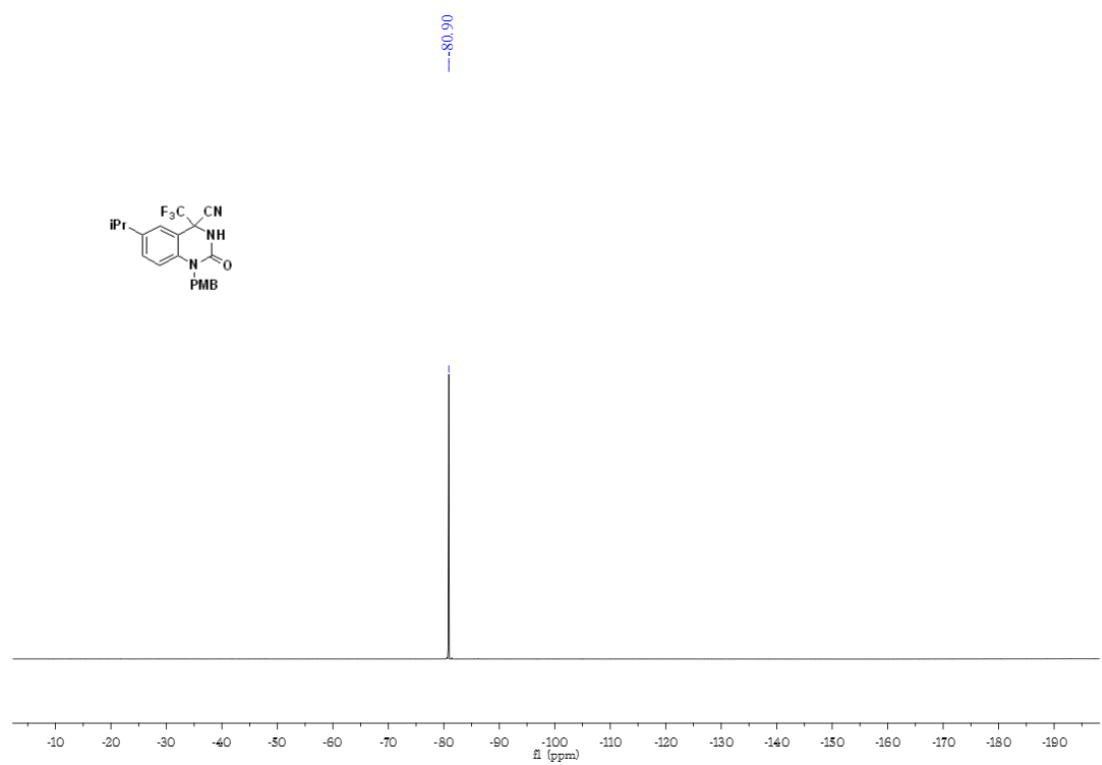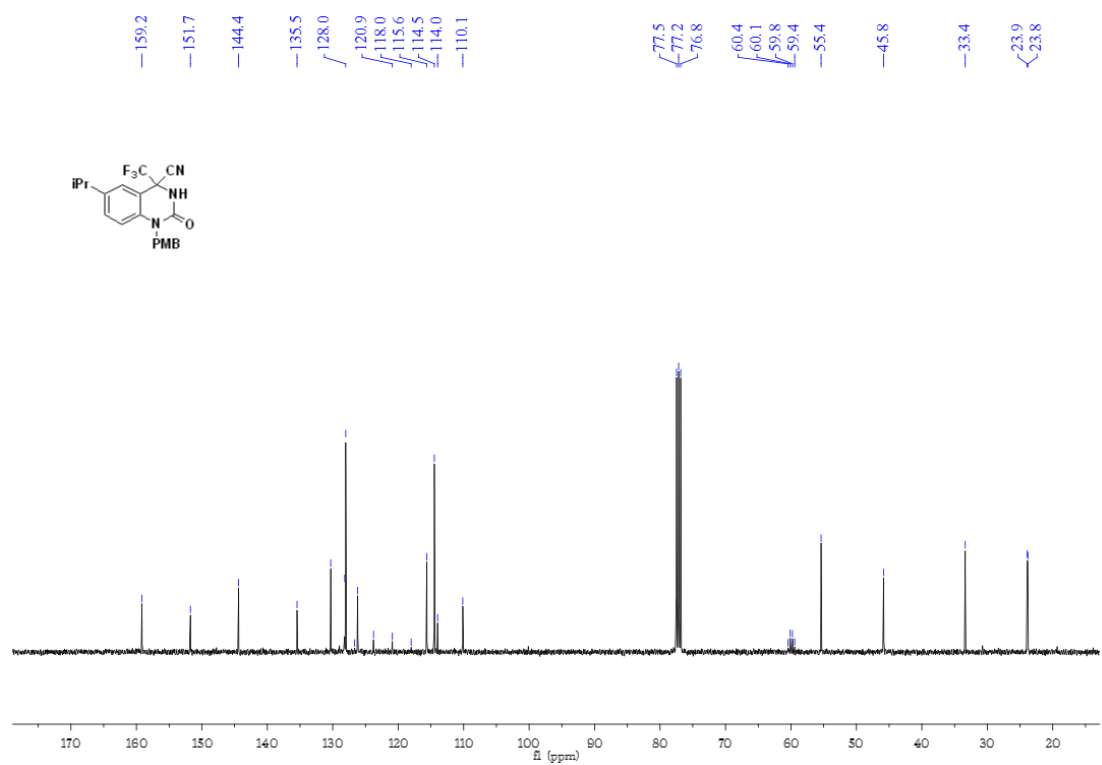

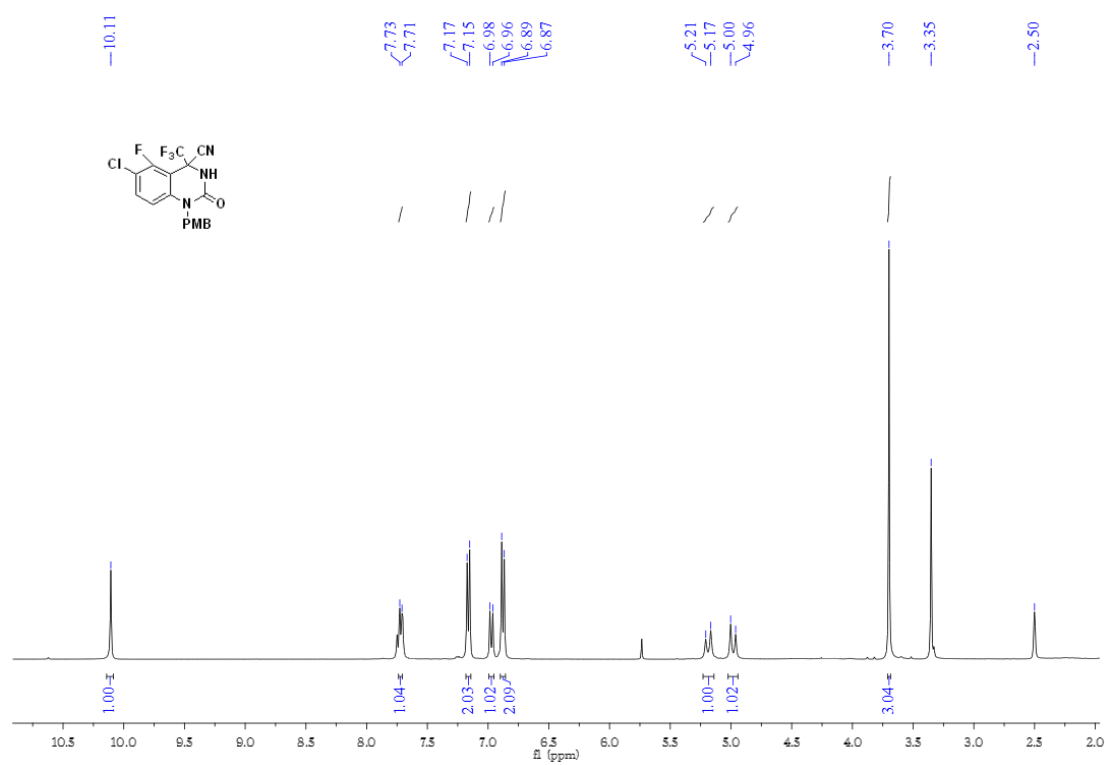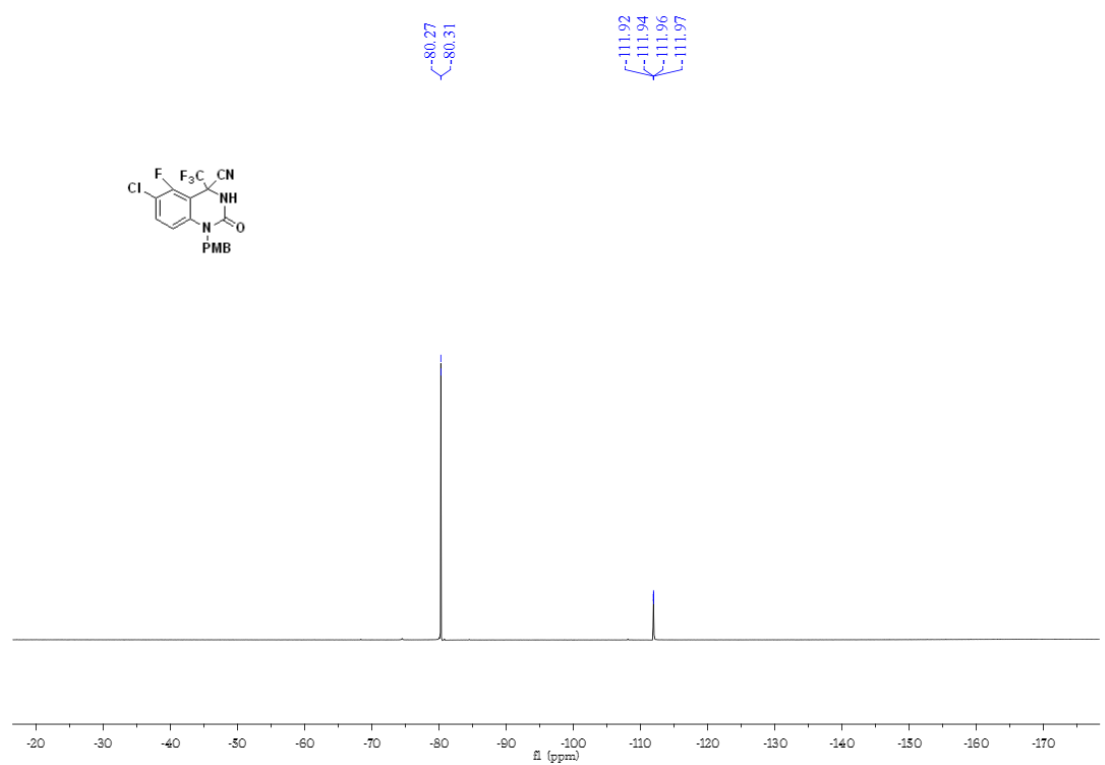

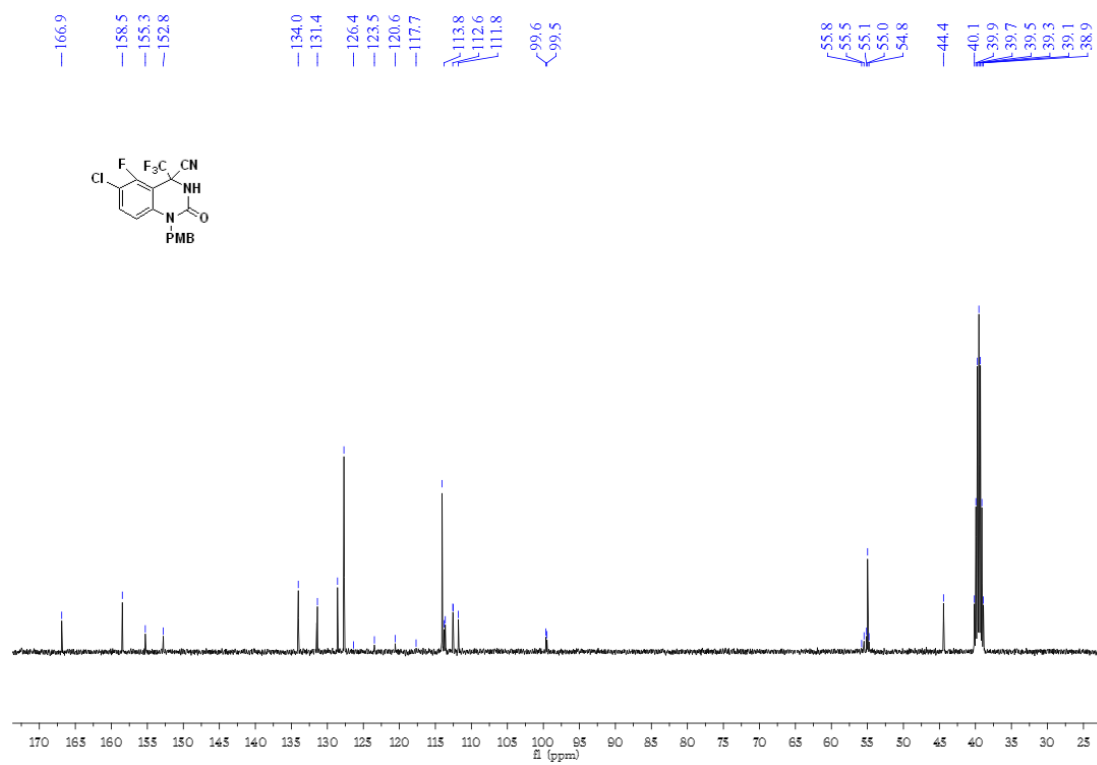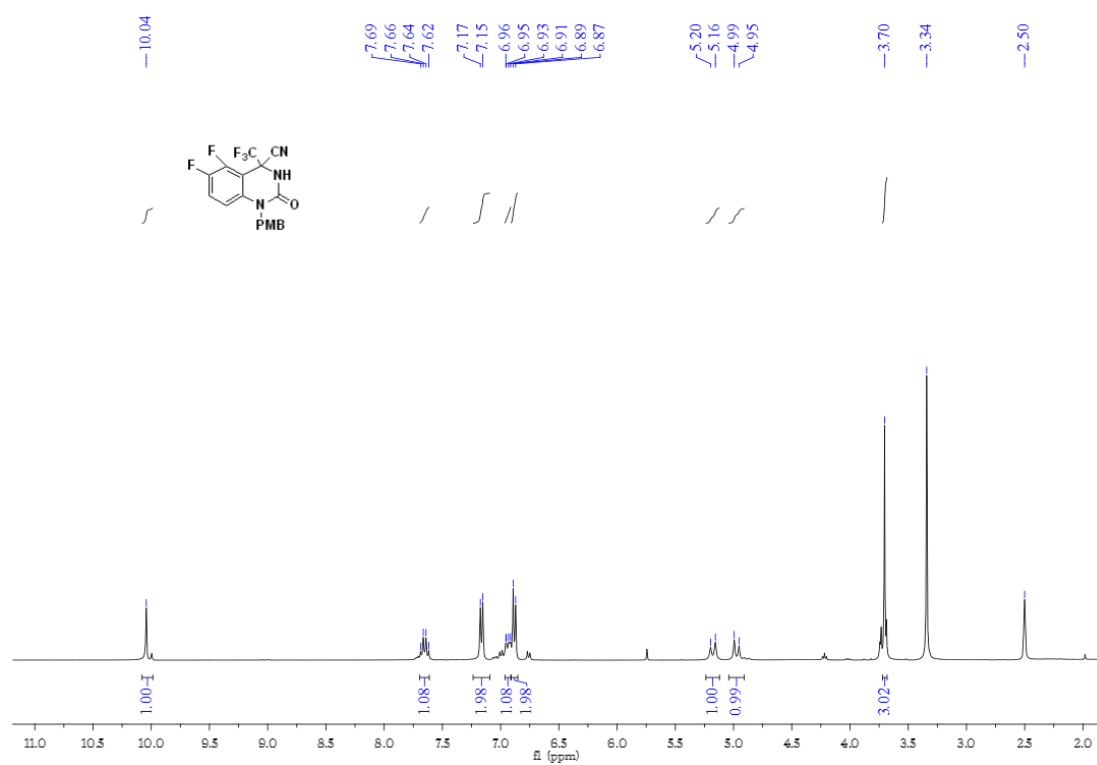



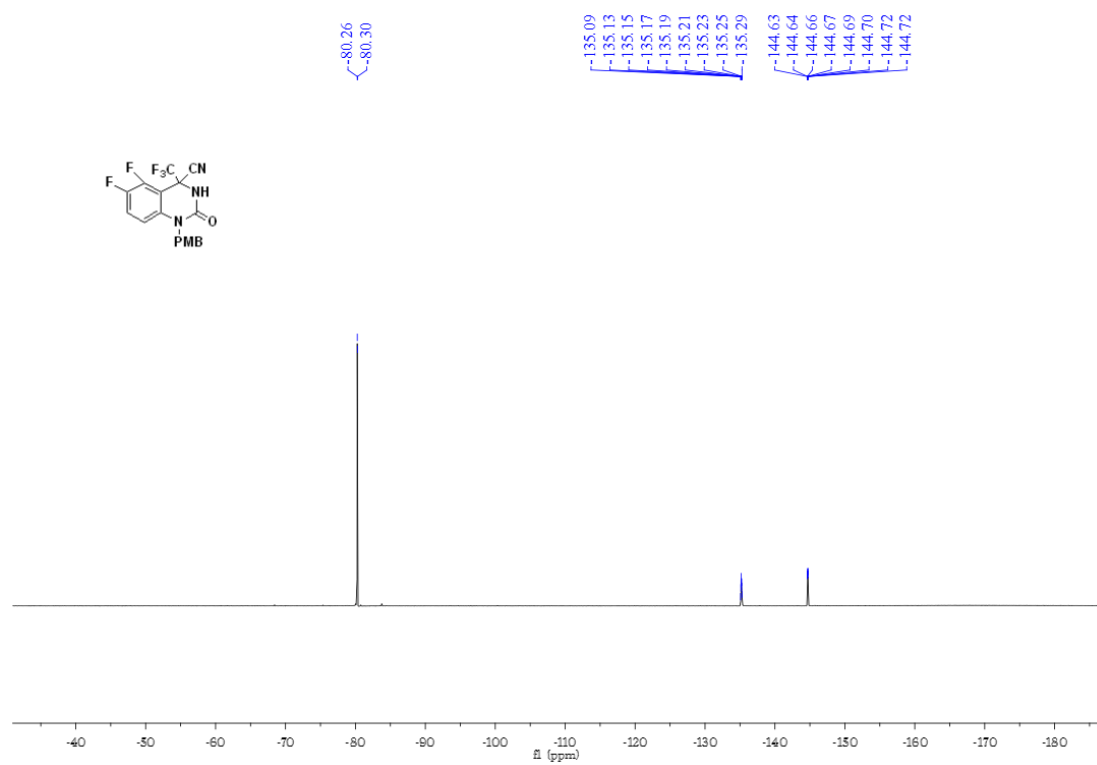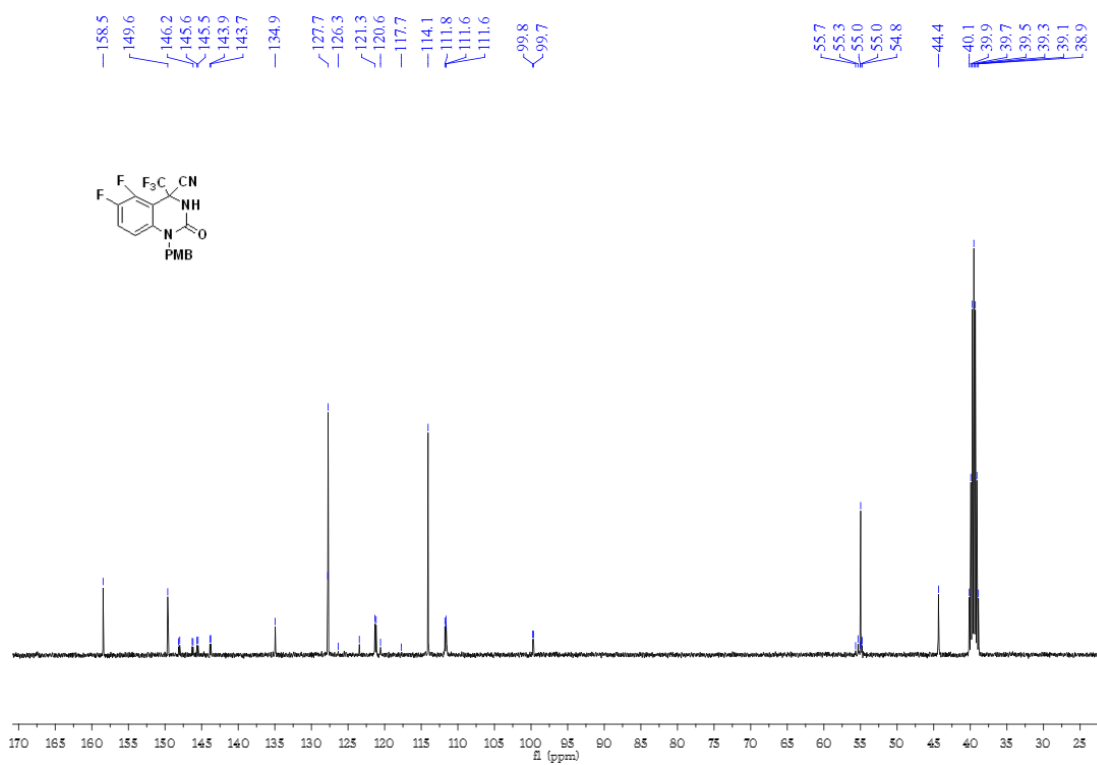

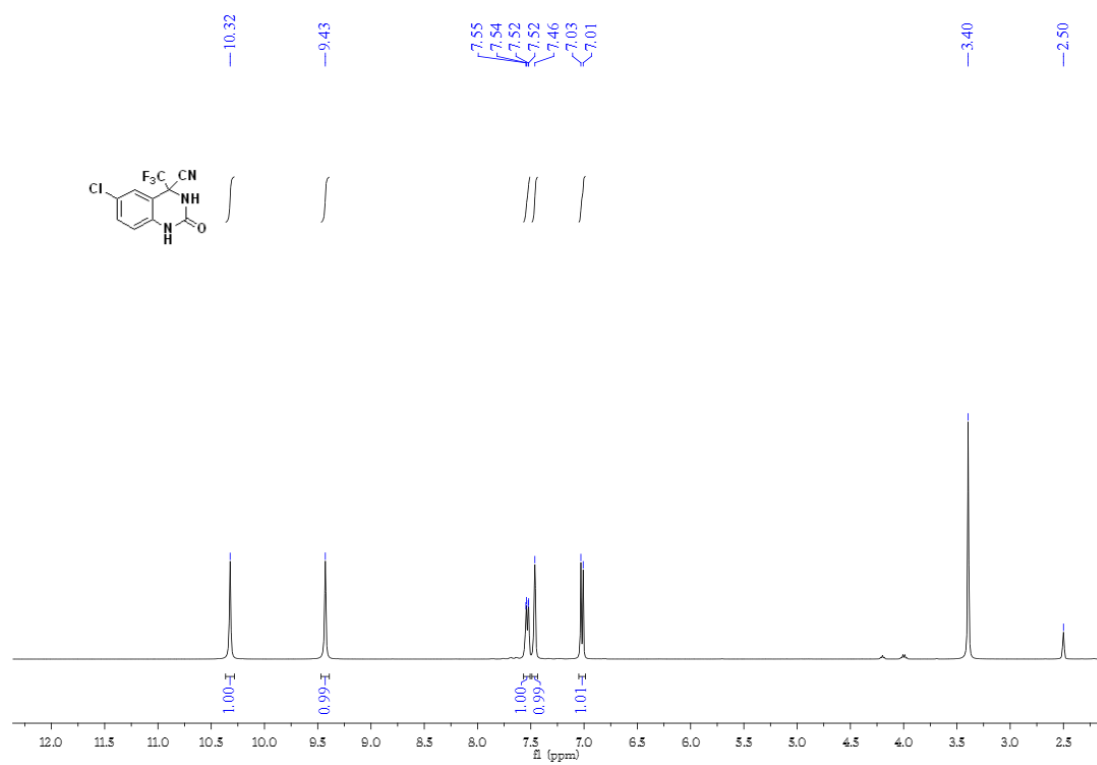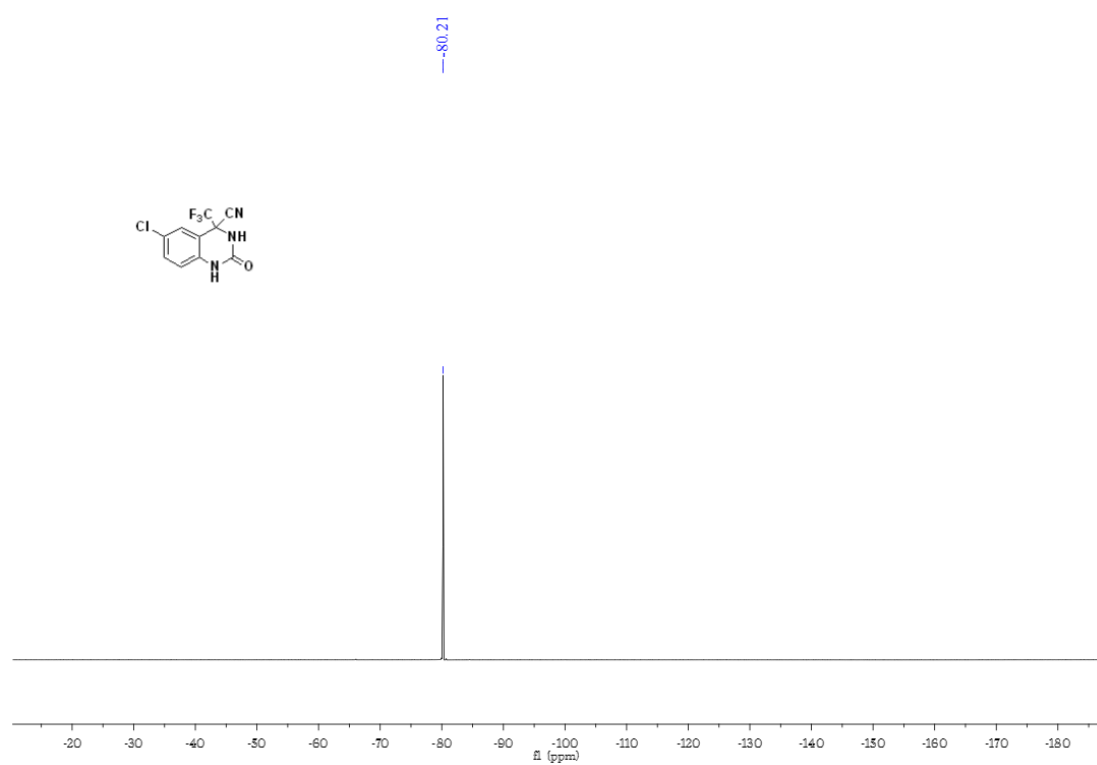

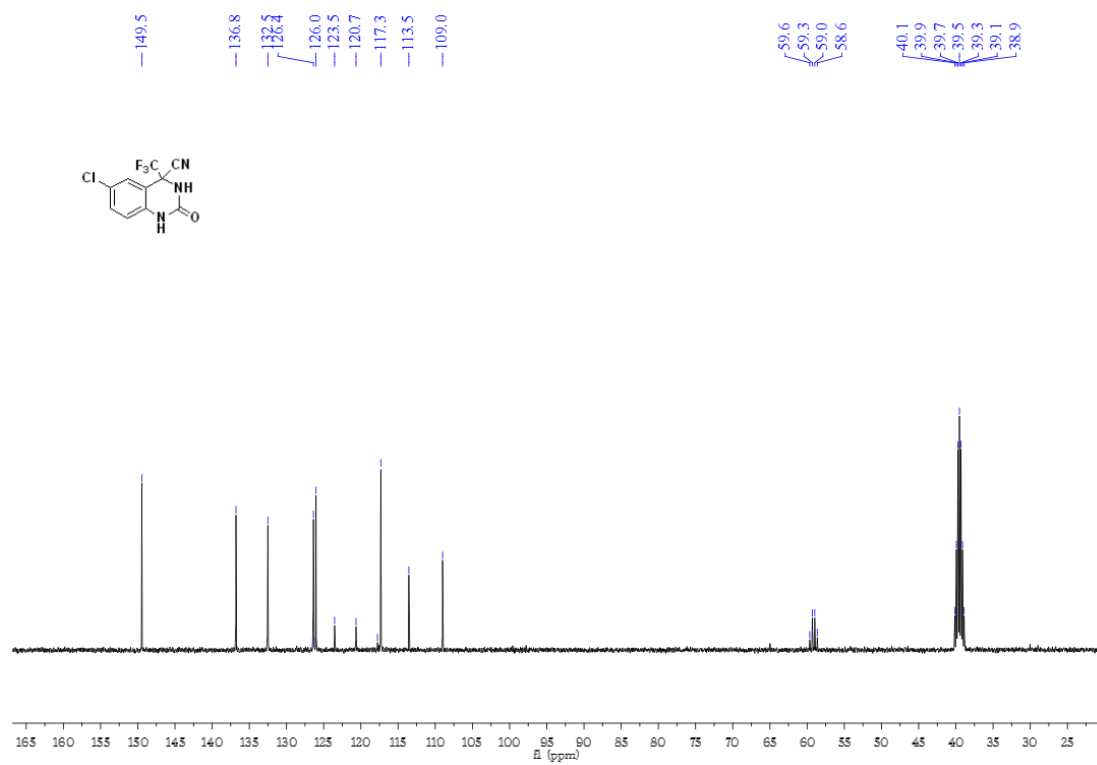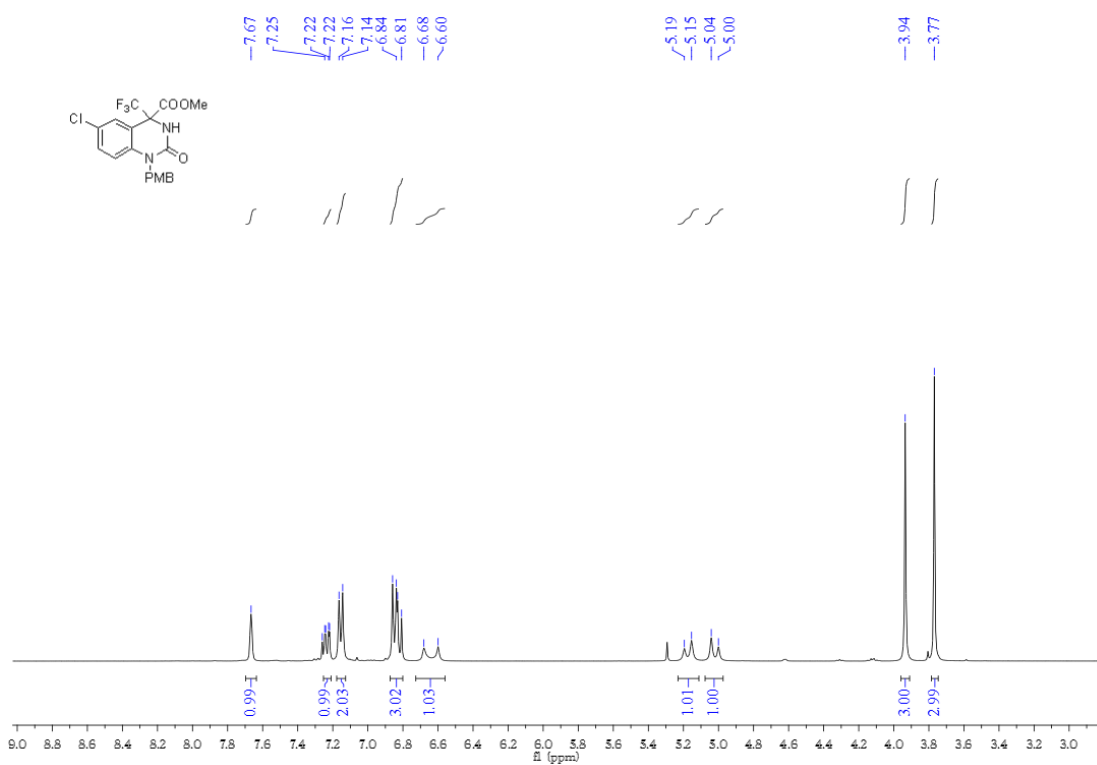

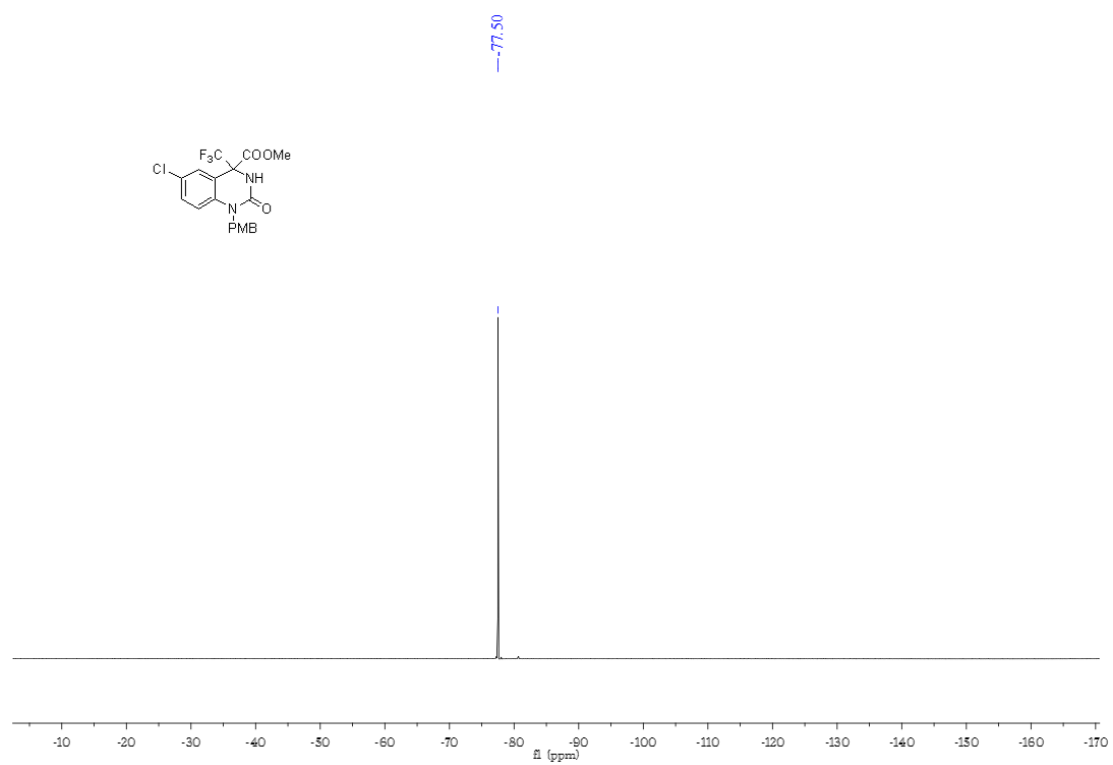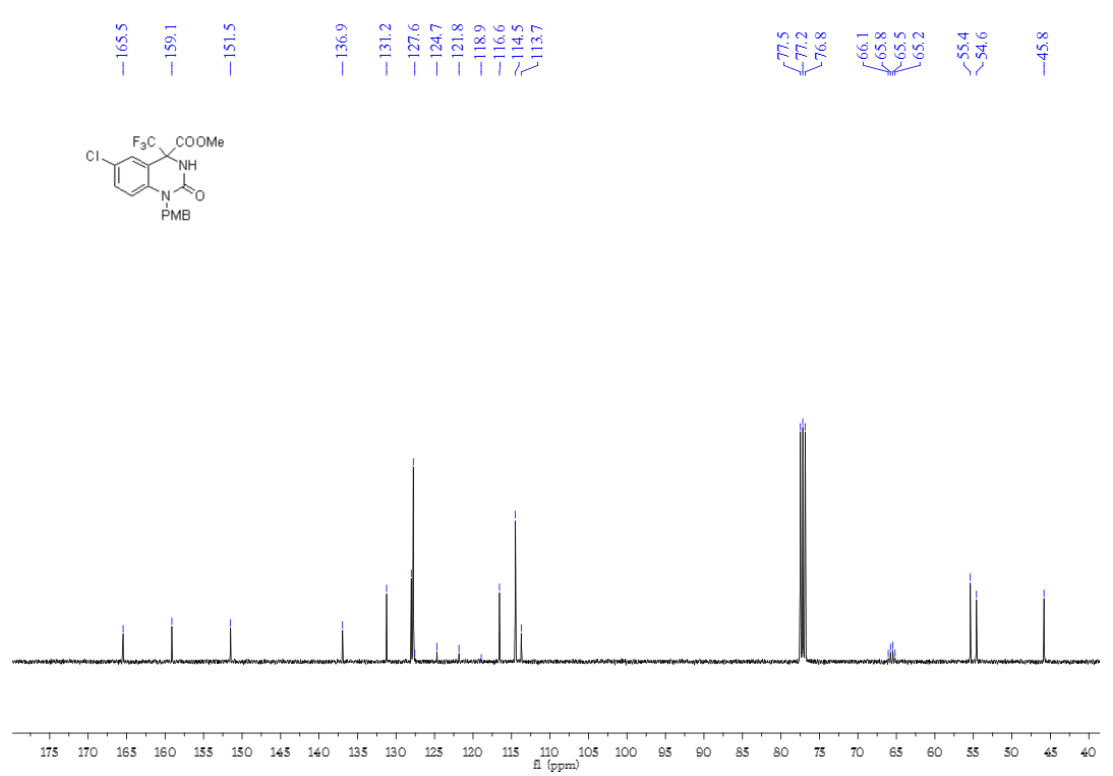

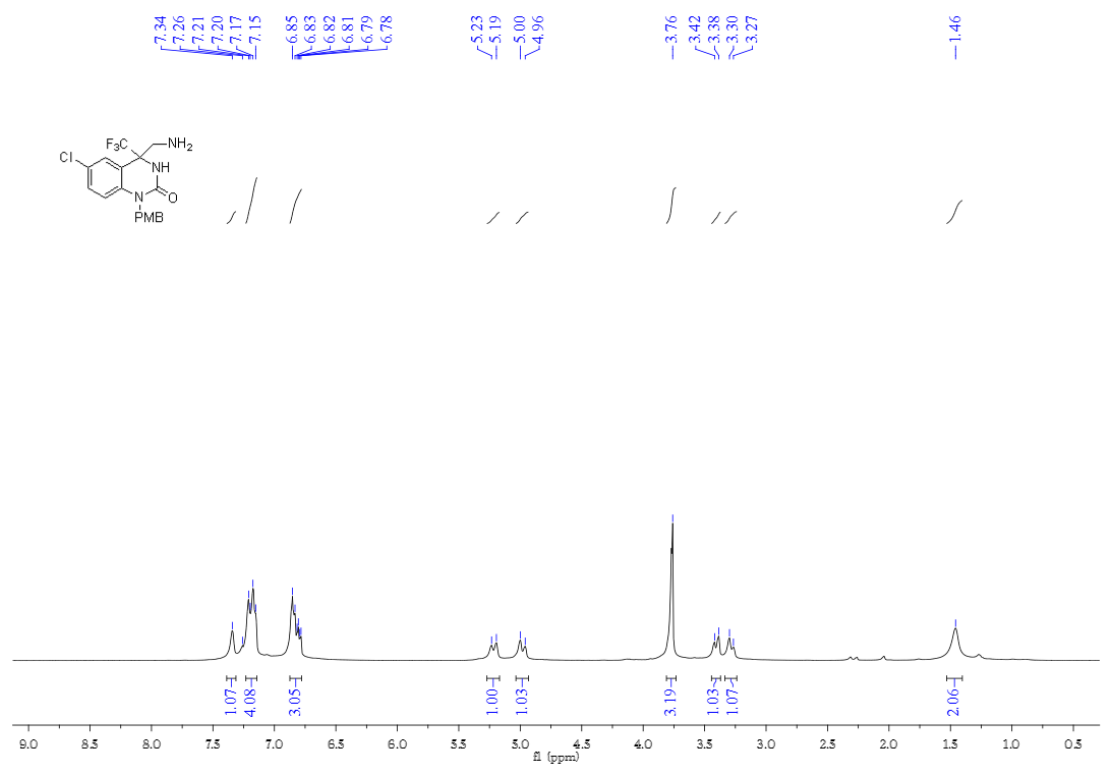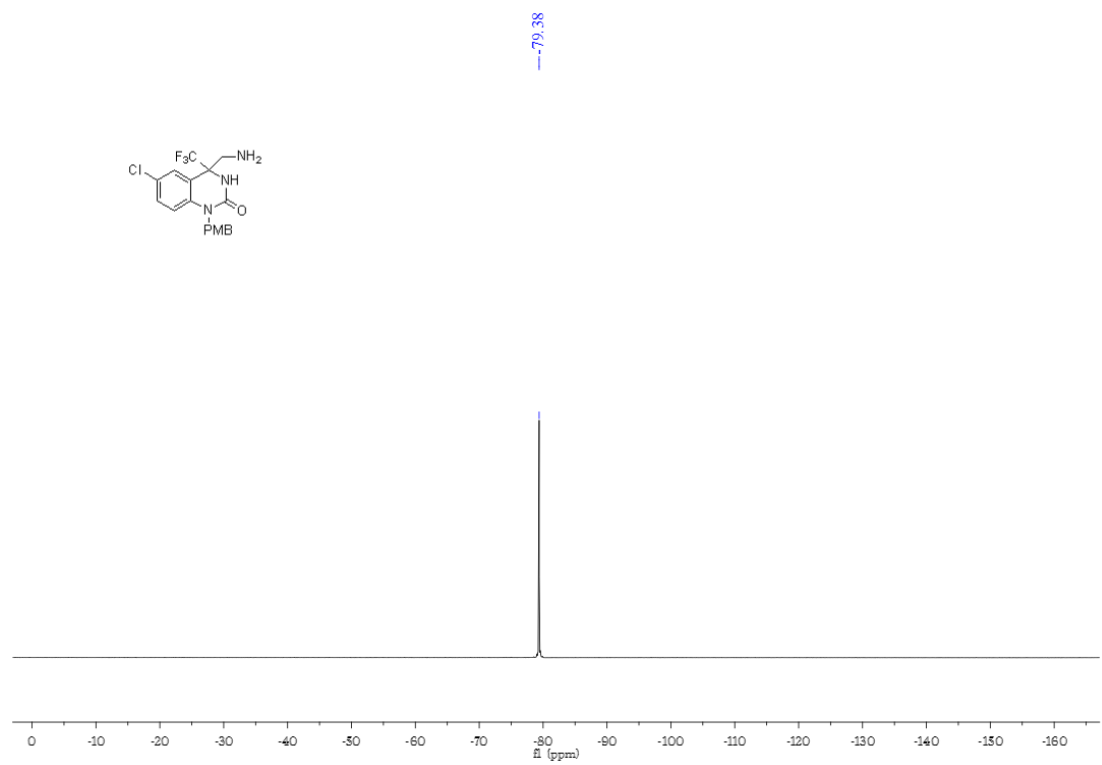

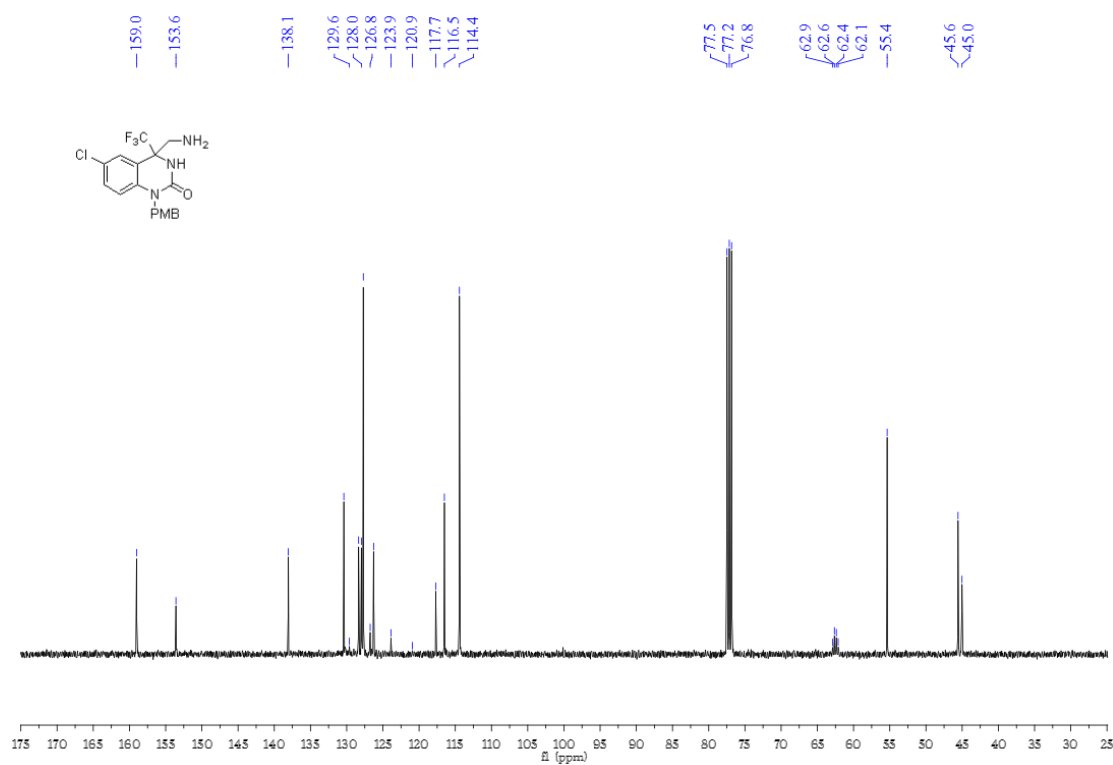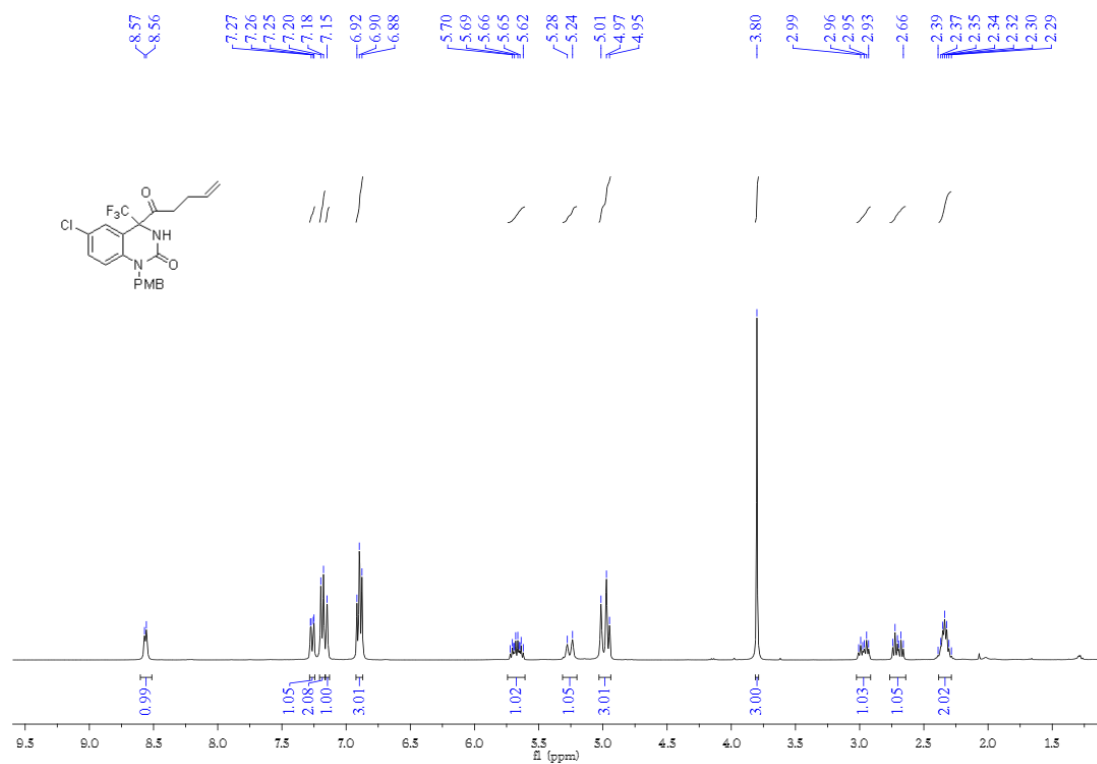

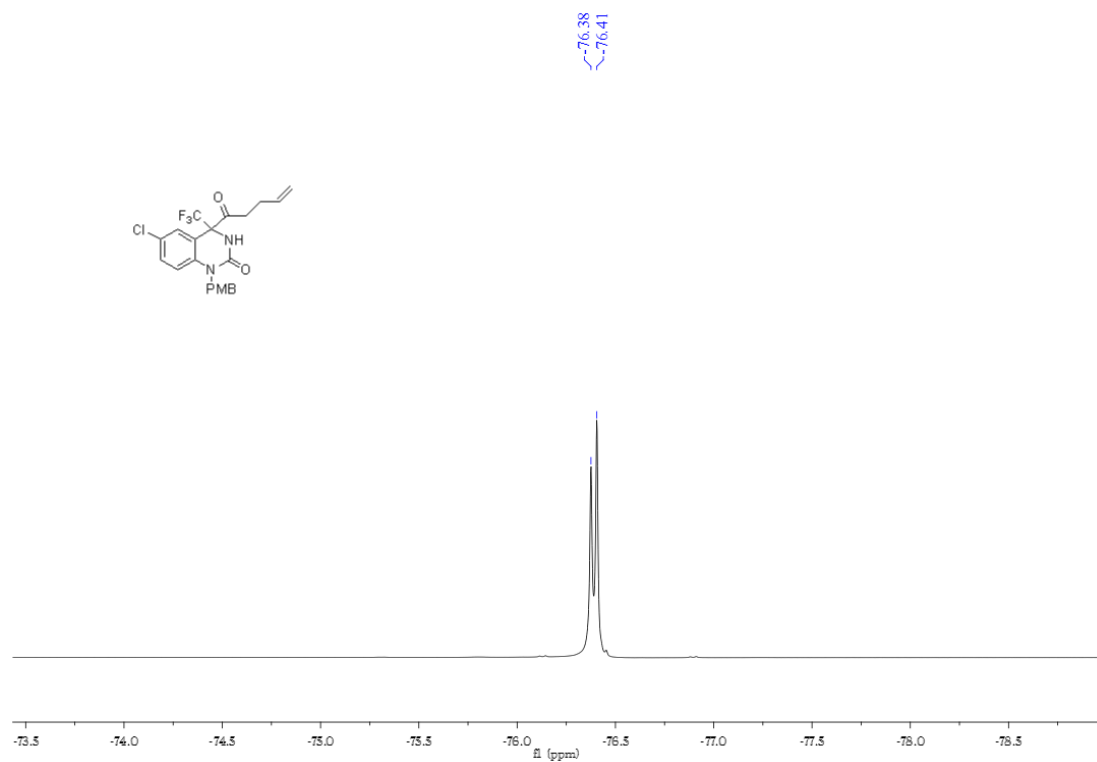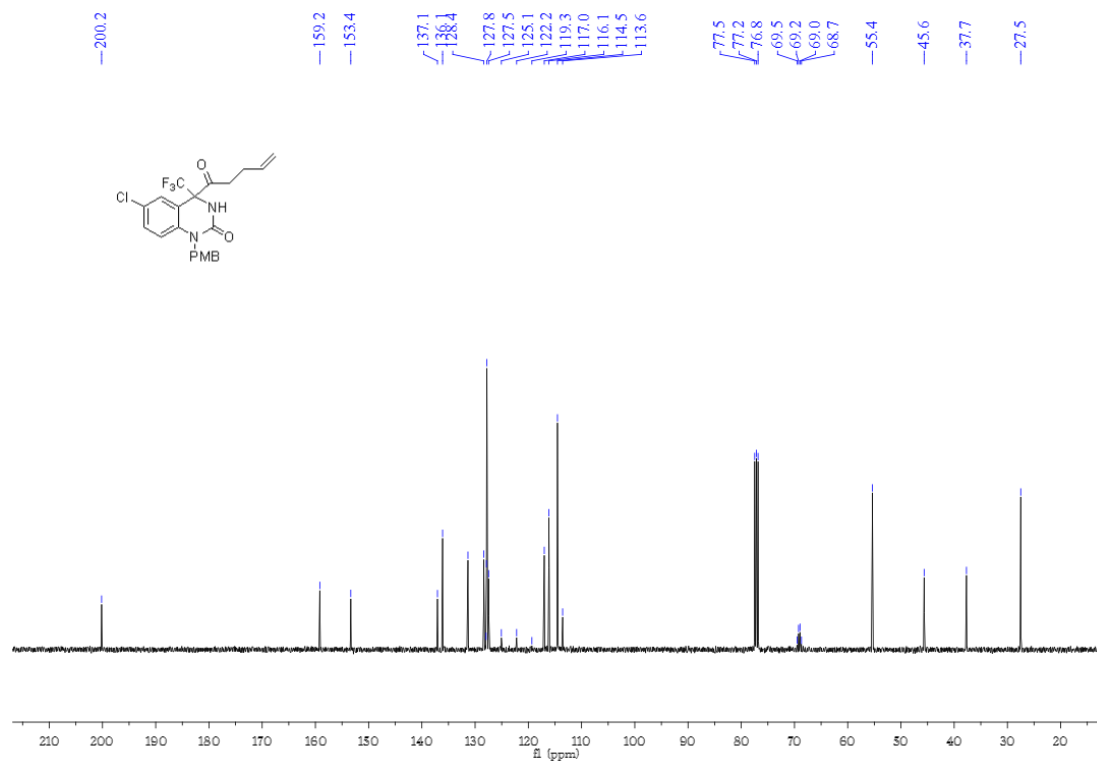

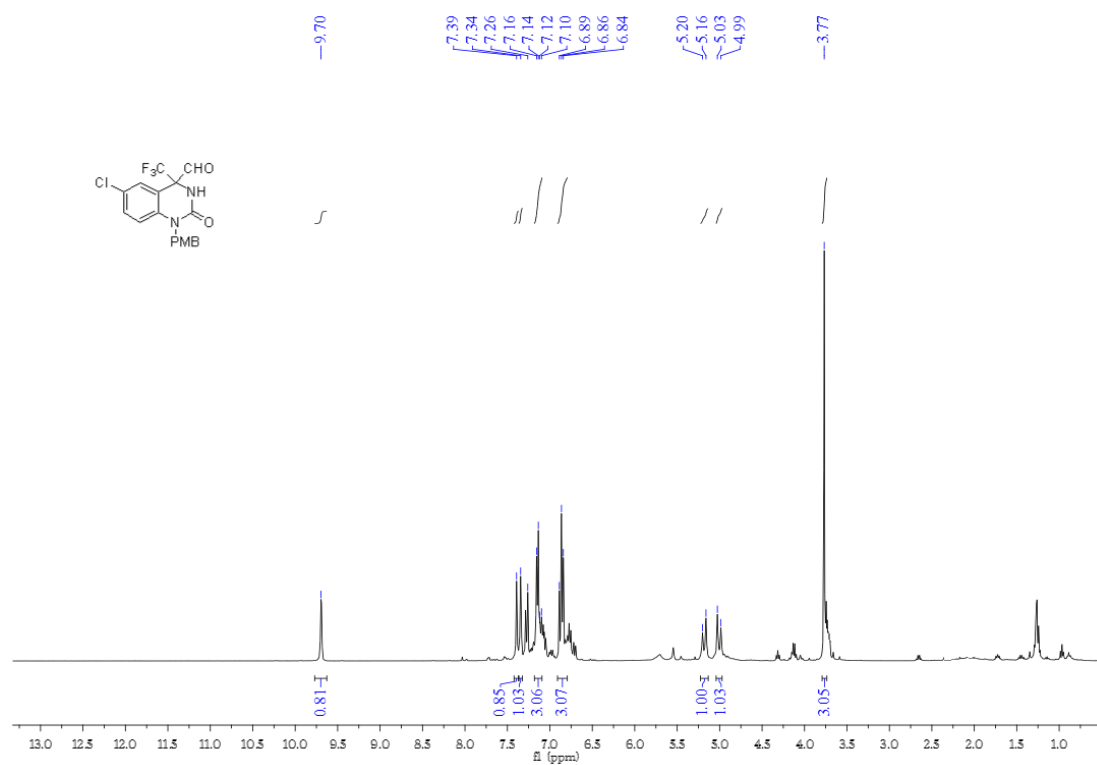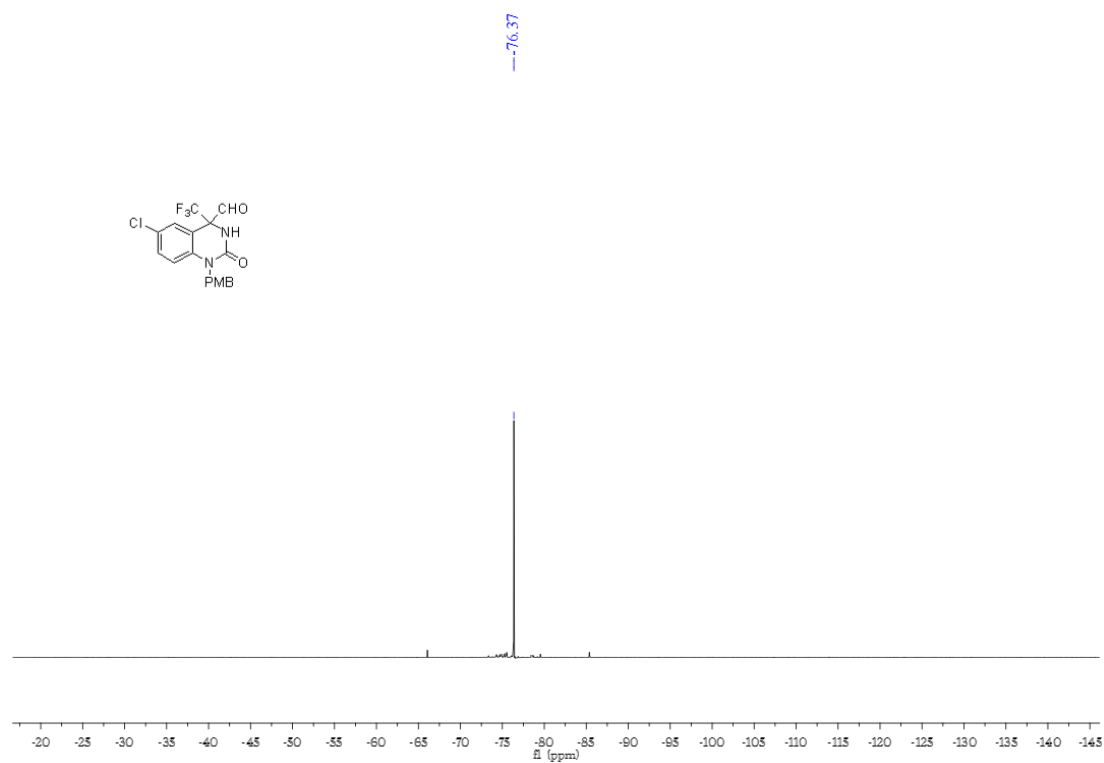



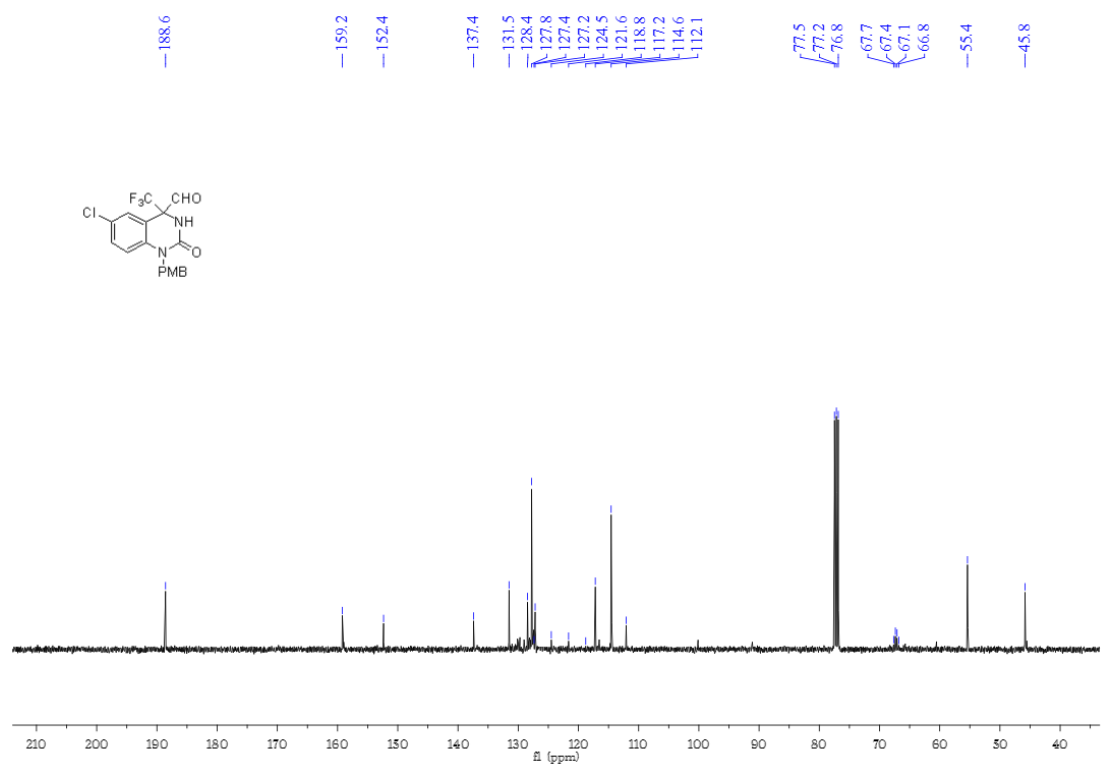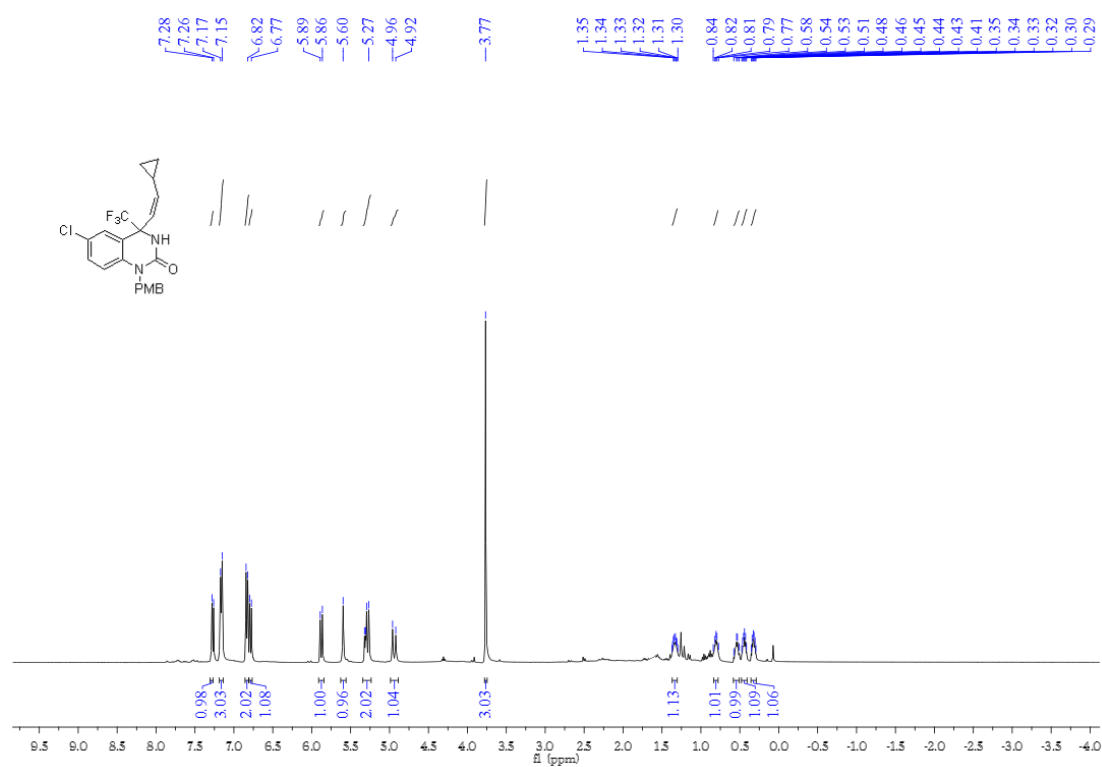

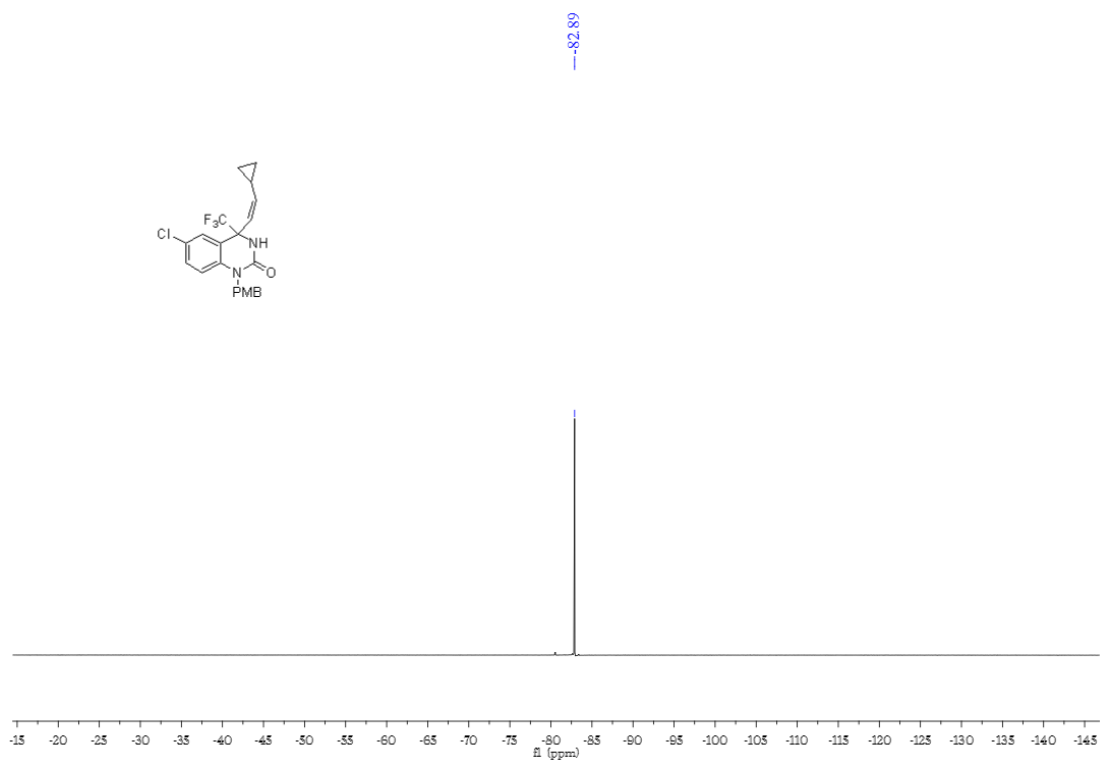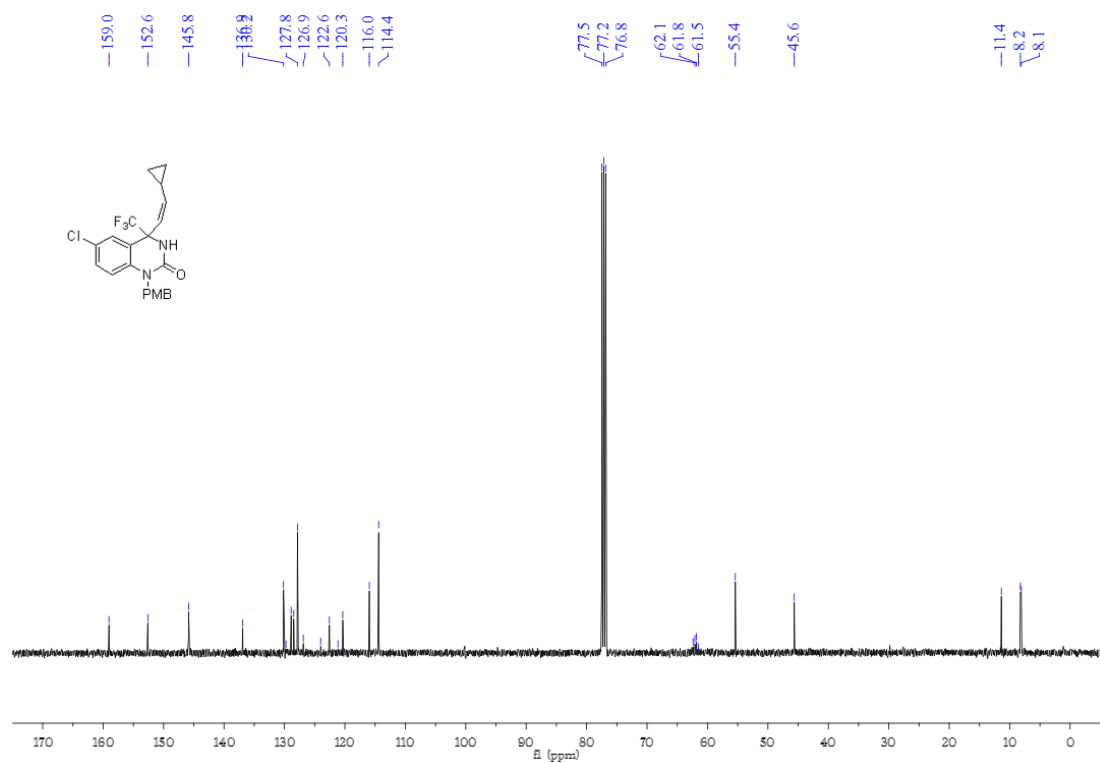

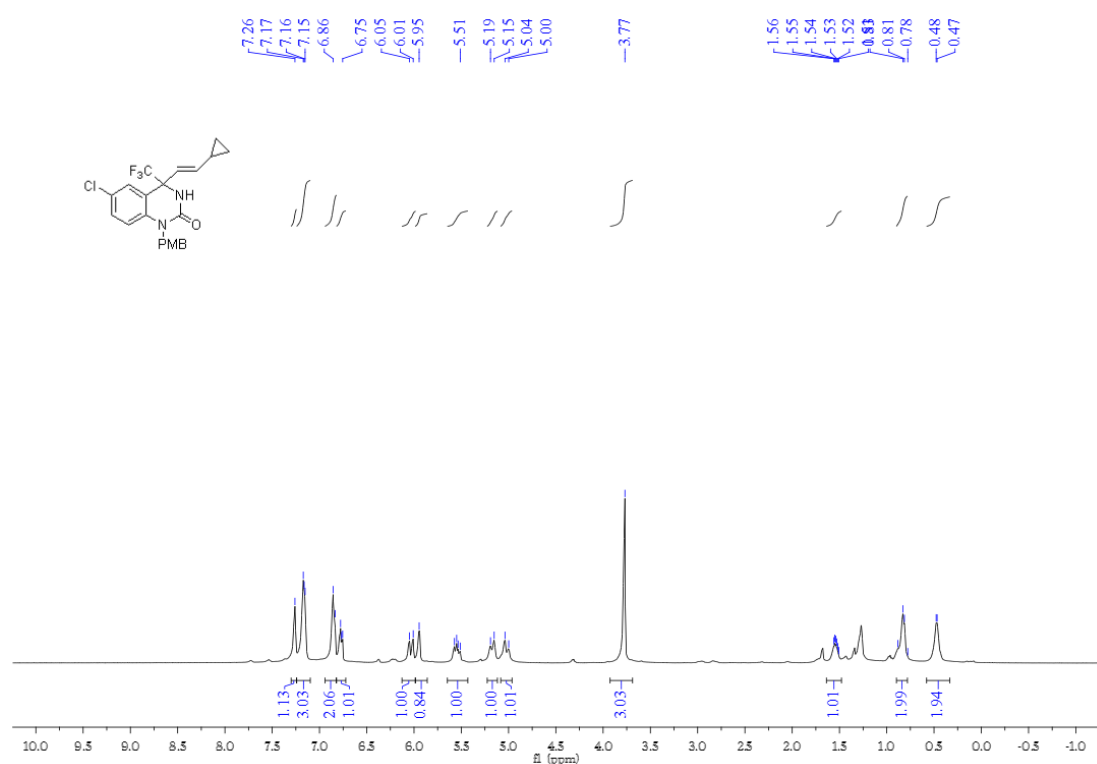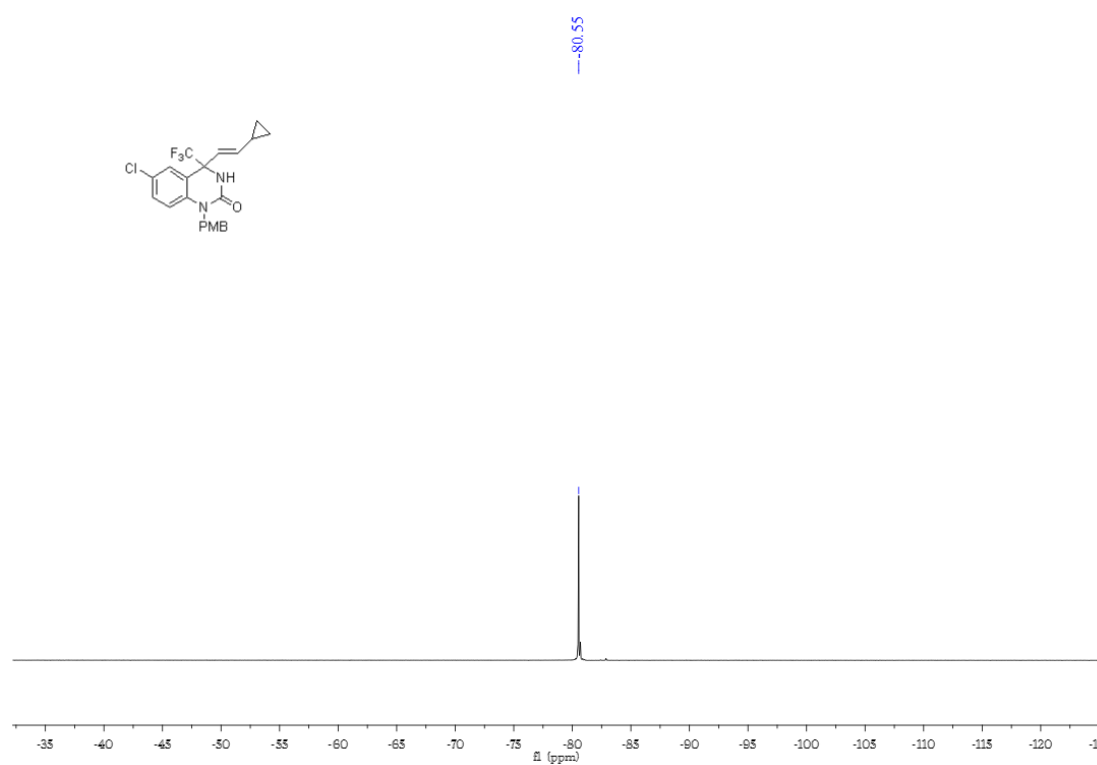

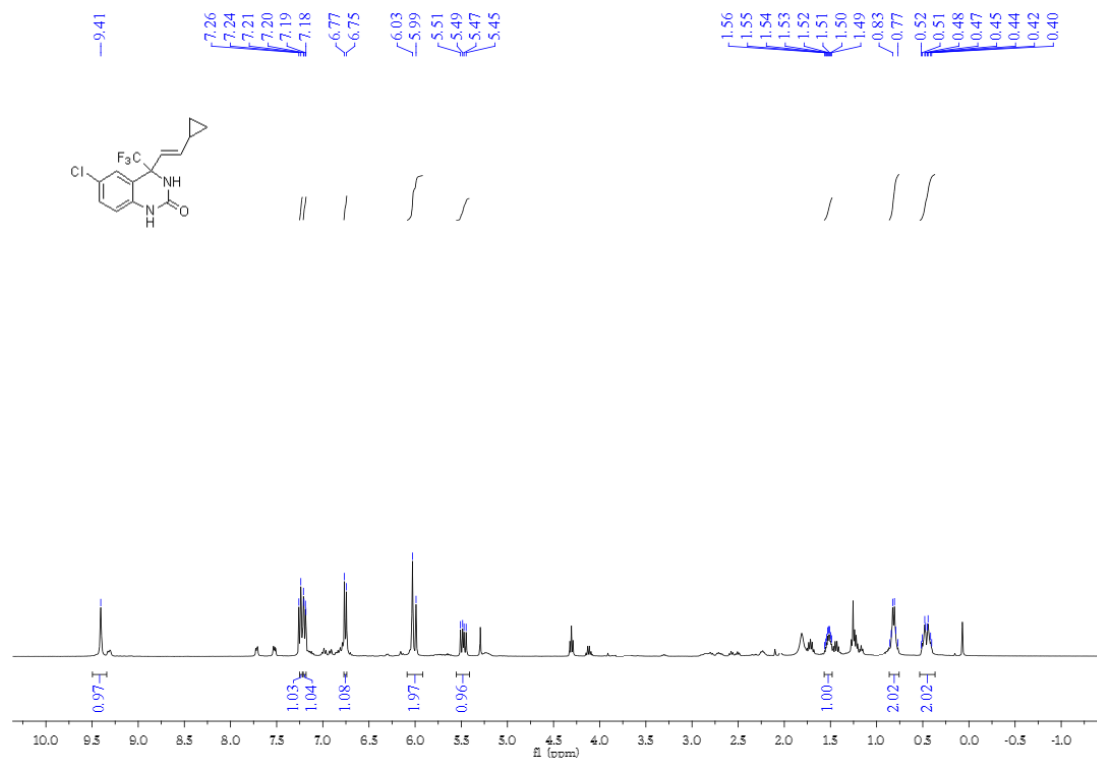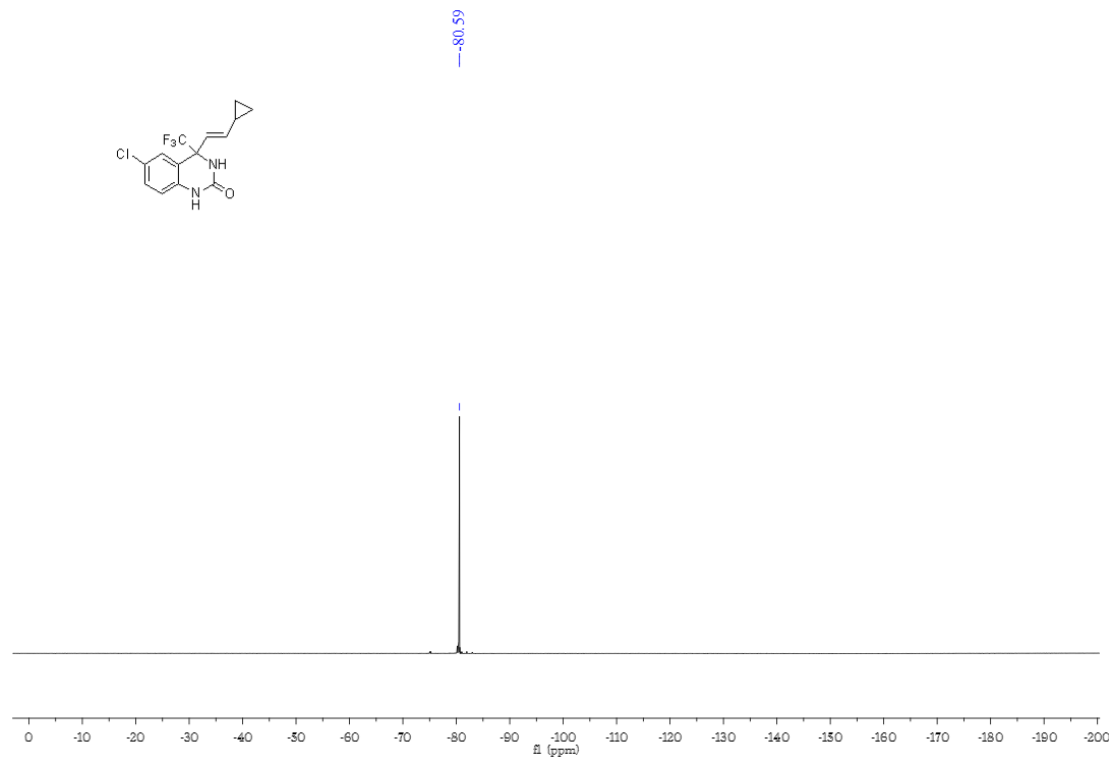

## HPLC Charts of the Addition products and related compounds

Sample Info : 254 nm, IC, i-PrOH : Hexane =20:80, 1.0 mL/min

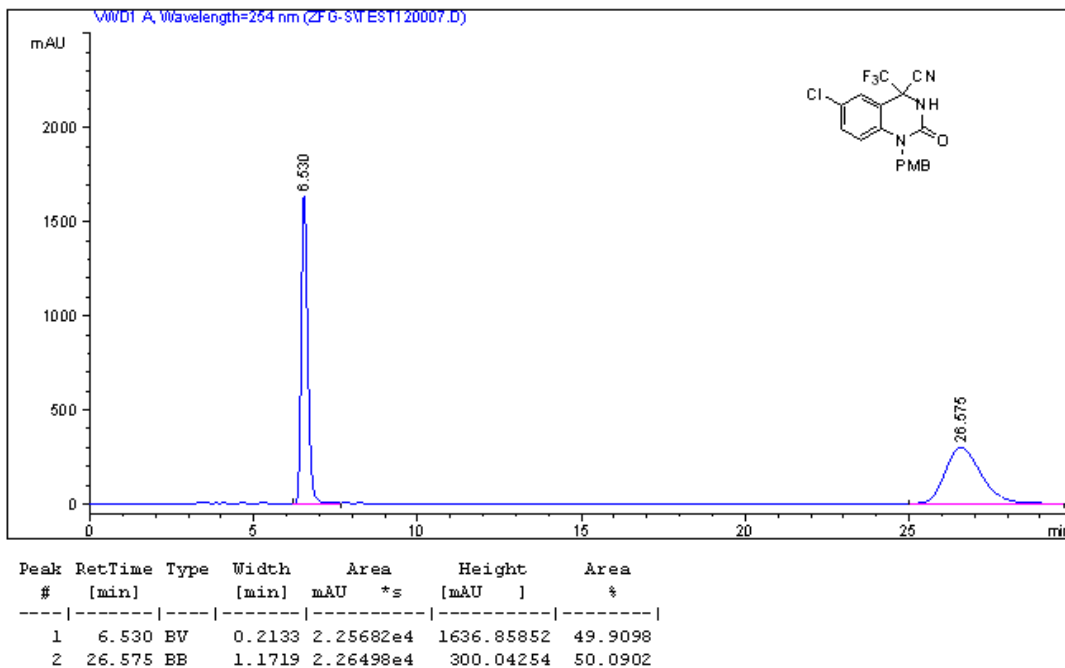

Sample Info : 254 nm, IC, i-PrOH : Hexane =20:80, 1.0 mL/min

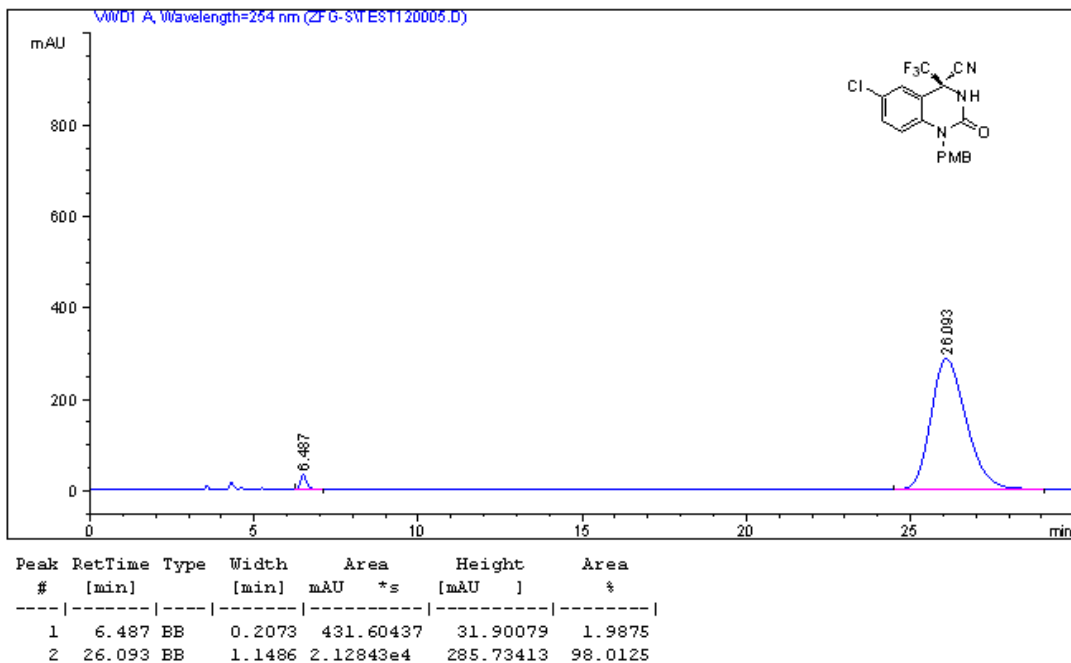

Sample Info : 254 nm, IC, i-PrOH : Hexane =20:80, 1.0 mL/min

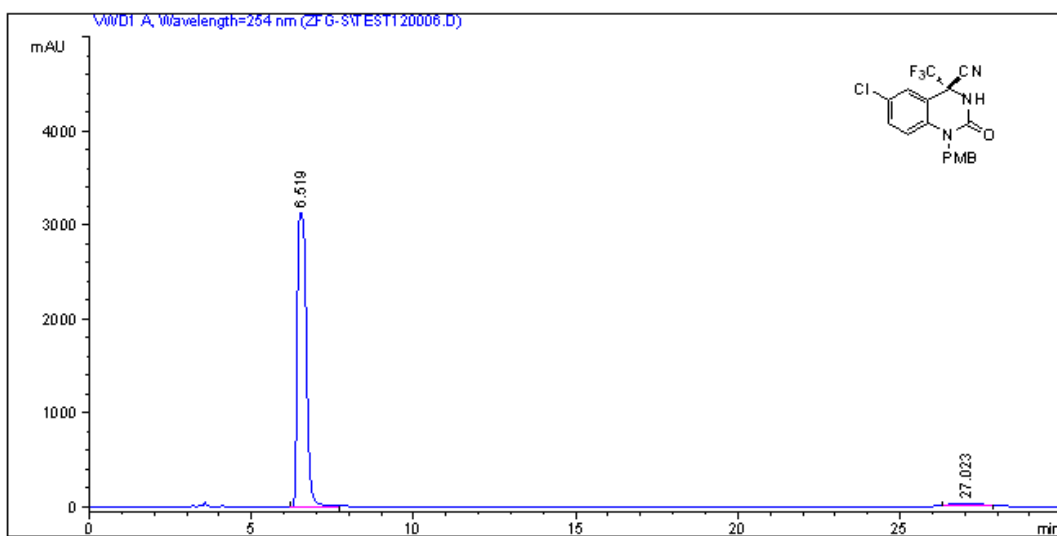

| Peak # | RetTime [min] | Type | Width [min] | Area mAU   | *s | Height [mAU] | Area %  |
|--------|---------------|------|-------------|------------|----|--------------|---------|
| 1      | 6.519         | VV   | 0.3083      | 6.01130e4  |    | 3133.62402   | 97.6564 |
| 2      | 27.023        | PP   | 0.9225      | 1442.64807 |    | 26.06297     | 2.3436  |

Sample Info : 254 nm, IC, i-PrOH : Hexane =20:80, 1.0 mL/min

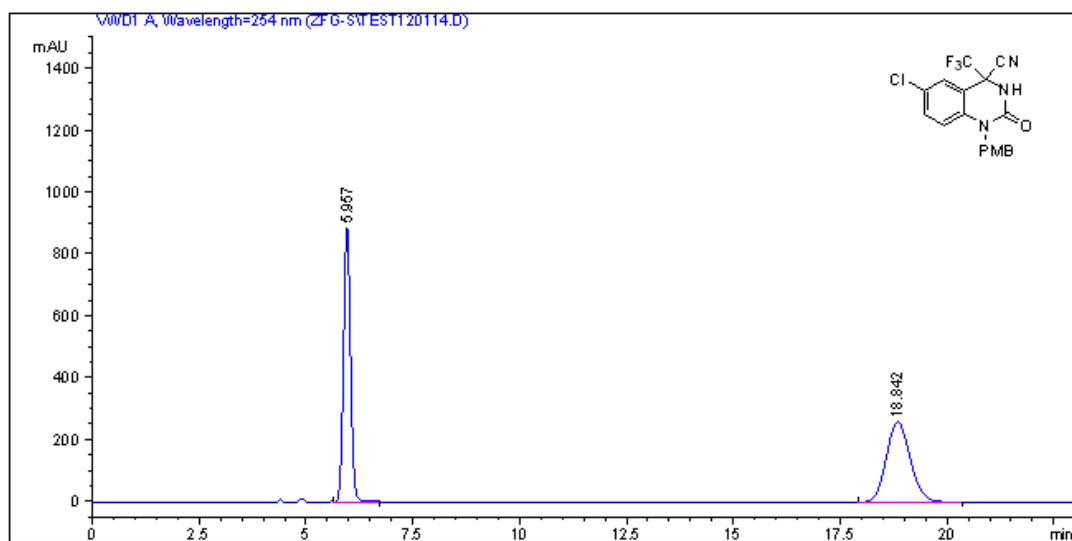

| Peak # | RetTime [min] | Type | Width [min] | Area mAU  | *s | Height [mAU] | Area %  |
|--------|---------------|------|-------------|-----------|----|--------------|---------|
| 1      | 5.957         | VB   | 0.1764      | 1.00788e4 |    | 886.22485    | 49.9581 |
| 2      | 18.842        | BB   | 0.6034      | 1.00957e4 |    | 258.95340    | 50.0419 |

Sample Info : 254 nm, IC, i-PrOH : Hexane =20:80, 1.0 mL/min

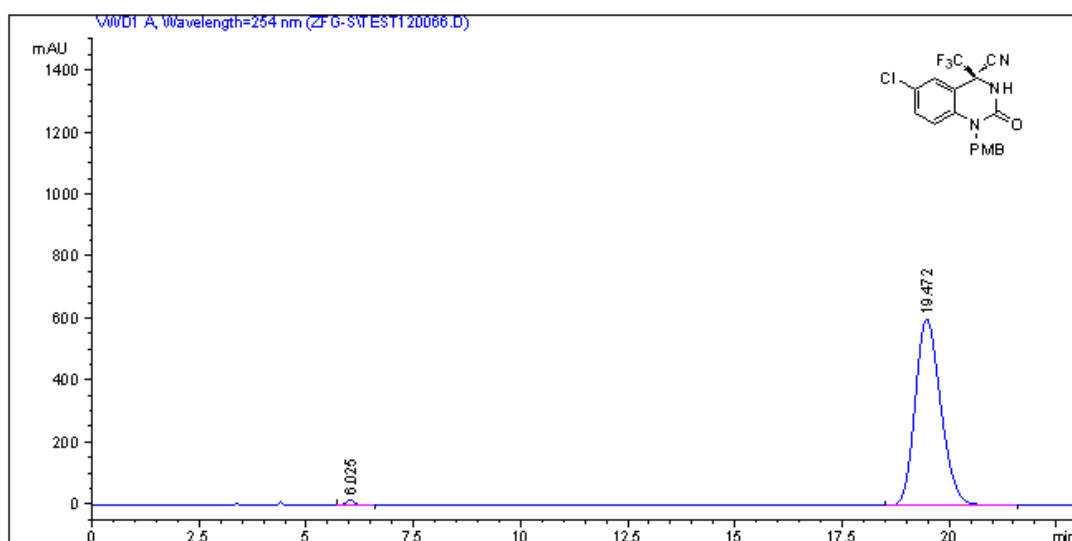

Sample Info : 254 nm, IC, i-PrOH : Hexane =20:80, 1.0 mL/min

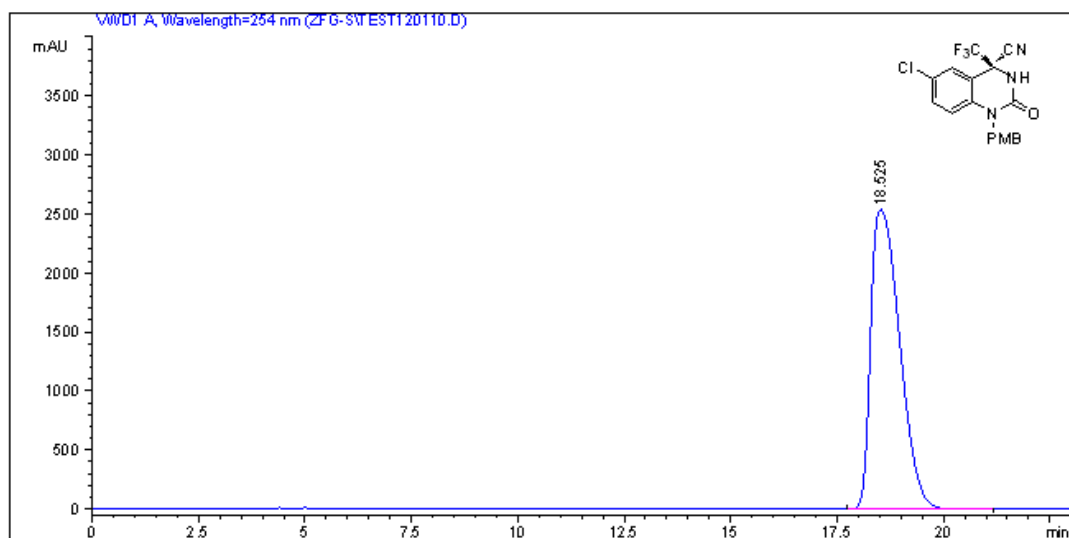

Sample Info : 254 nm, IC, i-PrOH : Hexane =25:75, 0.8mL/min

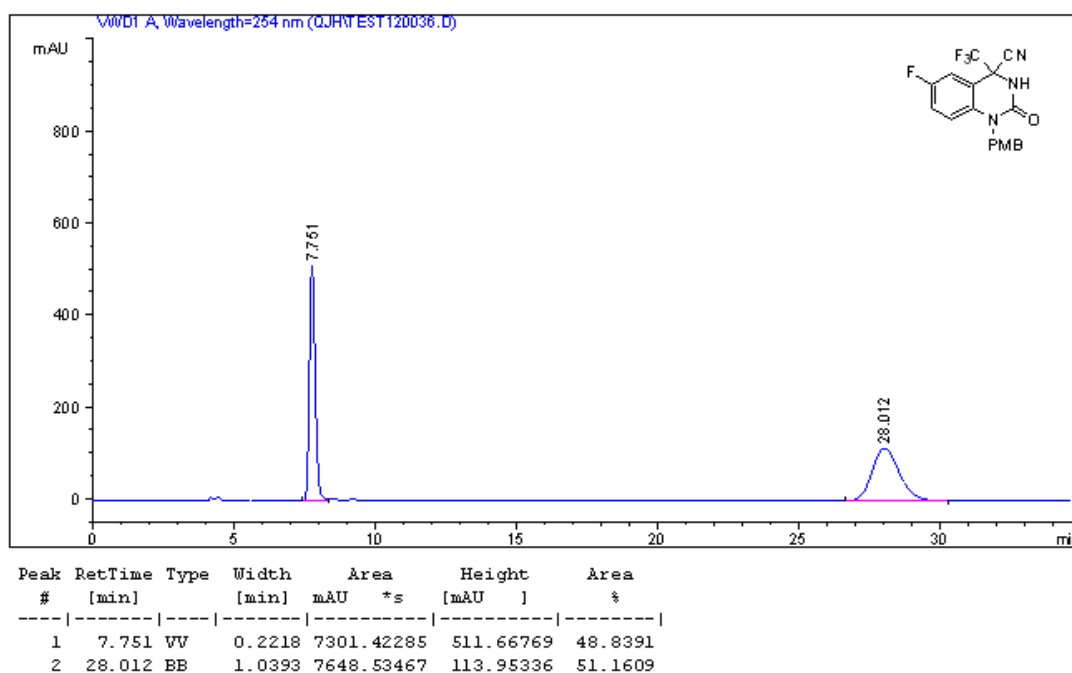

Sample Info : 254 nm, IC, i-PrOH : Hexane =25:75, 0.8mL/min

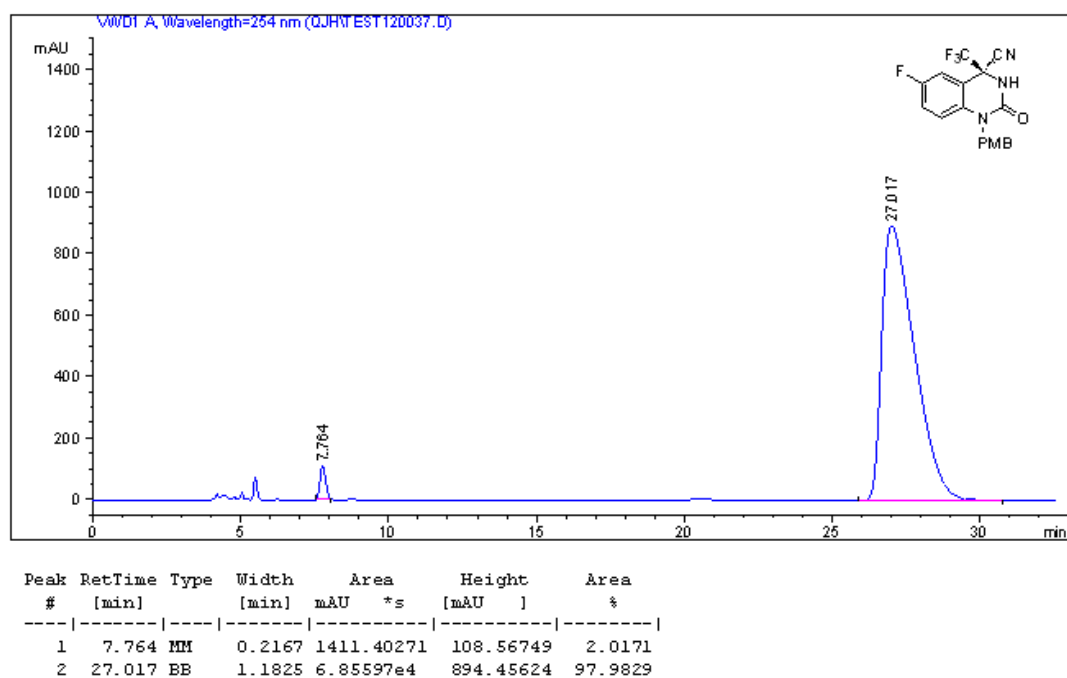



Sample Info : 254 nm, IC, i-PrOH : Hexane =25:75, 0.8 mL/min

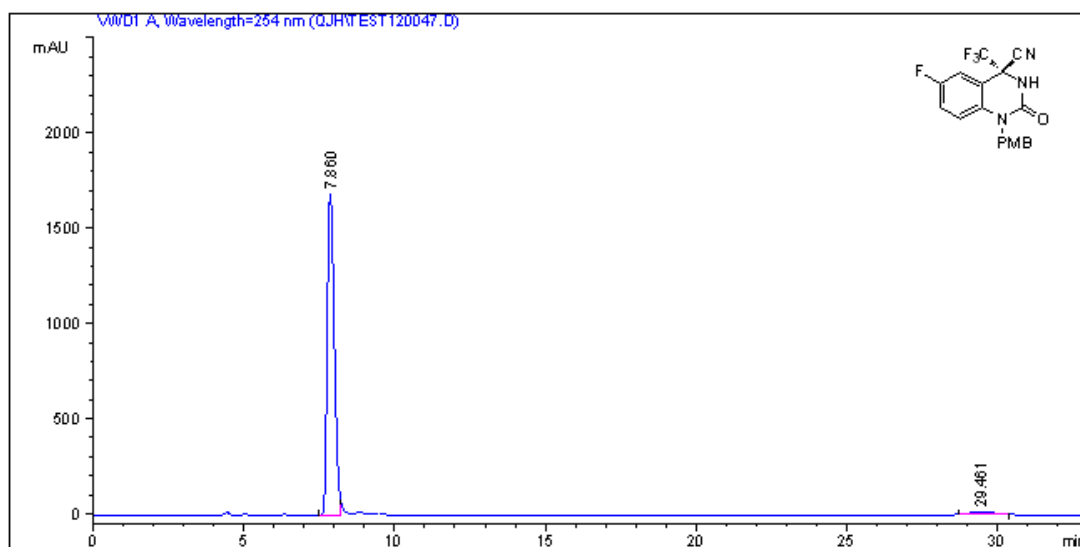

Sample Info : 254 nm, IC, i-PrOH : Hexane =20:80, 0.8mL/min

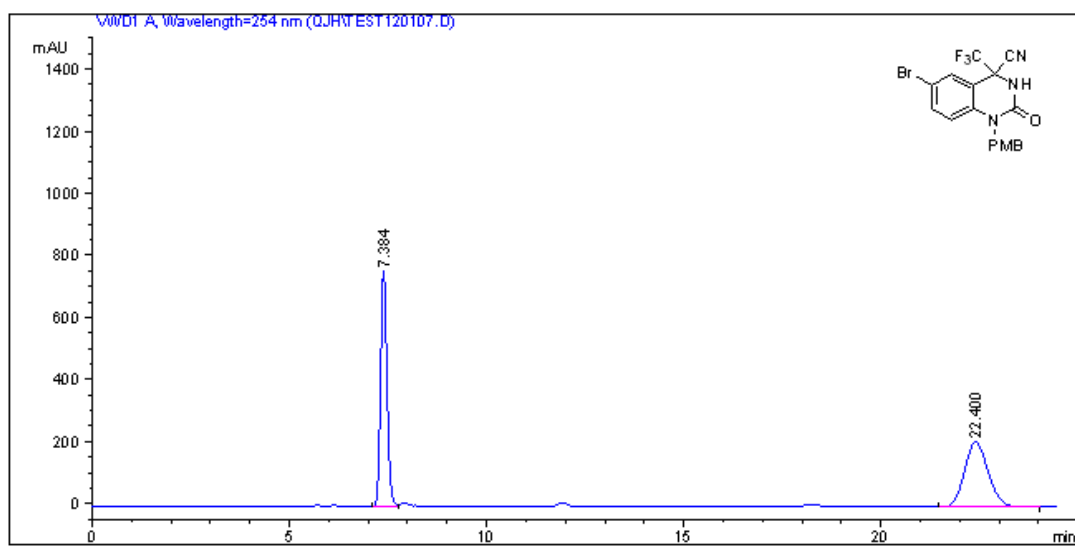

Sample Info : 254 nm, IC, i-PrOH : Hexane =20:80, 0.8mL/min

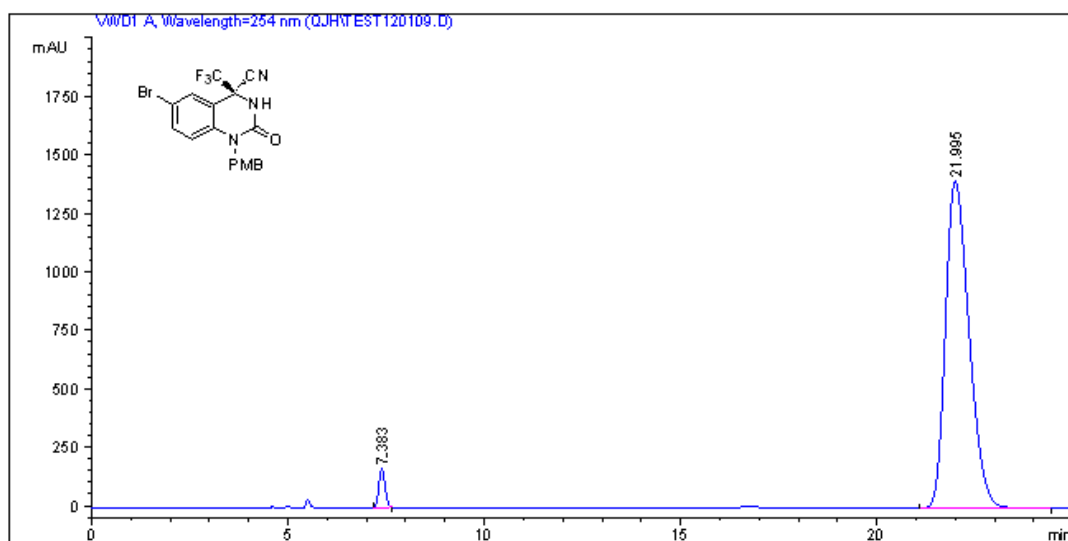

Sample Info : 254 nm, IC, i-PrOH : Hexane =20:80, 0.8mL/min

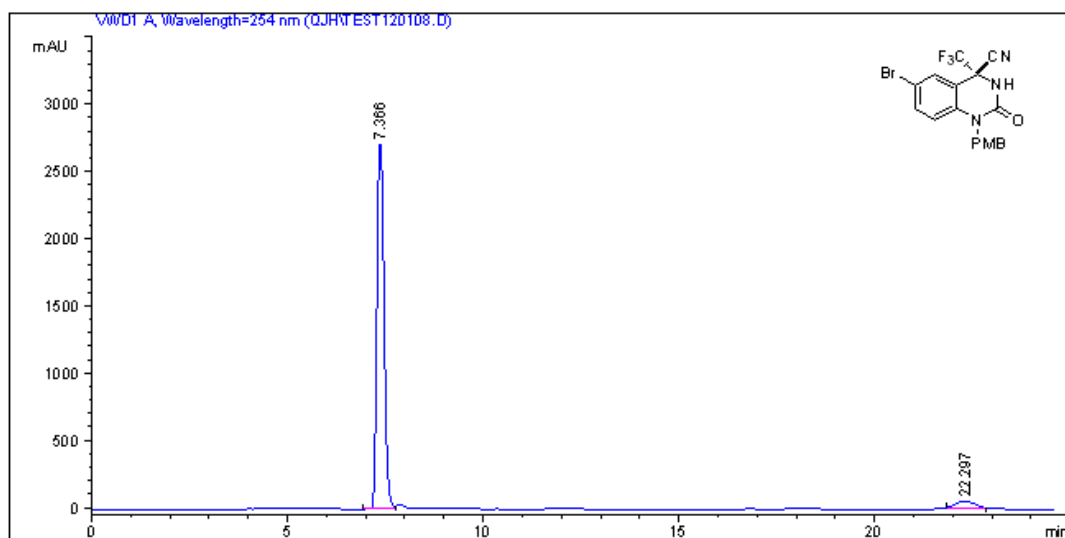

Sample Info : 254 nm, IC, i-PrOH : Hexane =20:80, 0.8mL/min

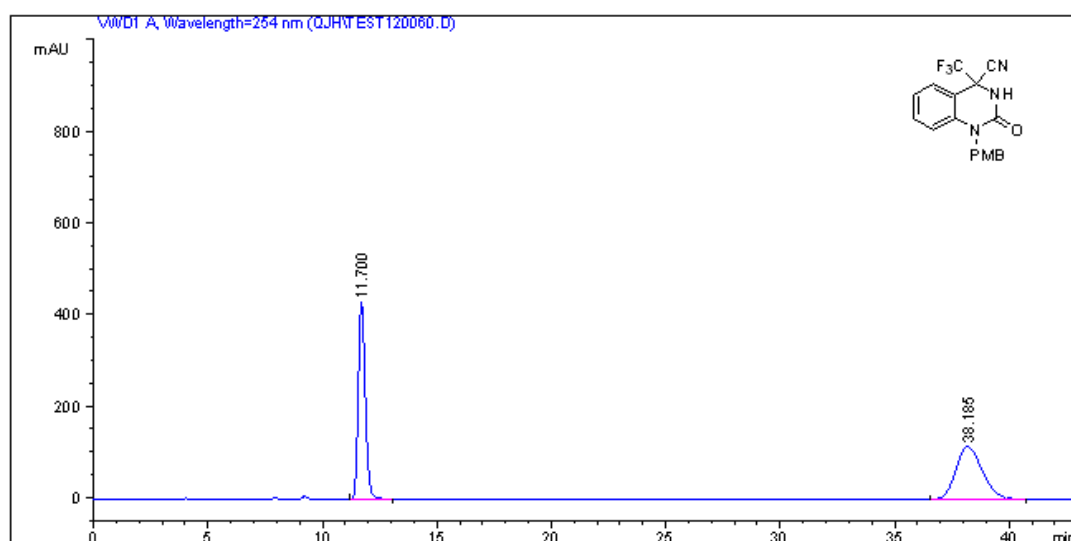

| Peak # | RetTime [min] | Type | Width [min] | Area mAU   | Area %  | Height [mAU] | Area %  |
|--------|---------------|------|-------------|------------|---------|--------------|---------|
| 1      | 11.700        | BB   | 0.3307      | 9163.86719 | 49.7419 | 429.06561    | 49.7419 |
| 2      | 38.185        | BB   | 1.2423      | 9258.95996 | 50.2581 | 114.98464    | 50.2581 |

Sample Info : 254 nm, IC, i-PrOH : Hexane =20:80, 0.8mL/min

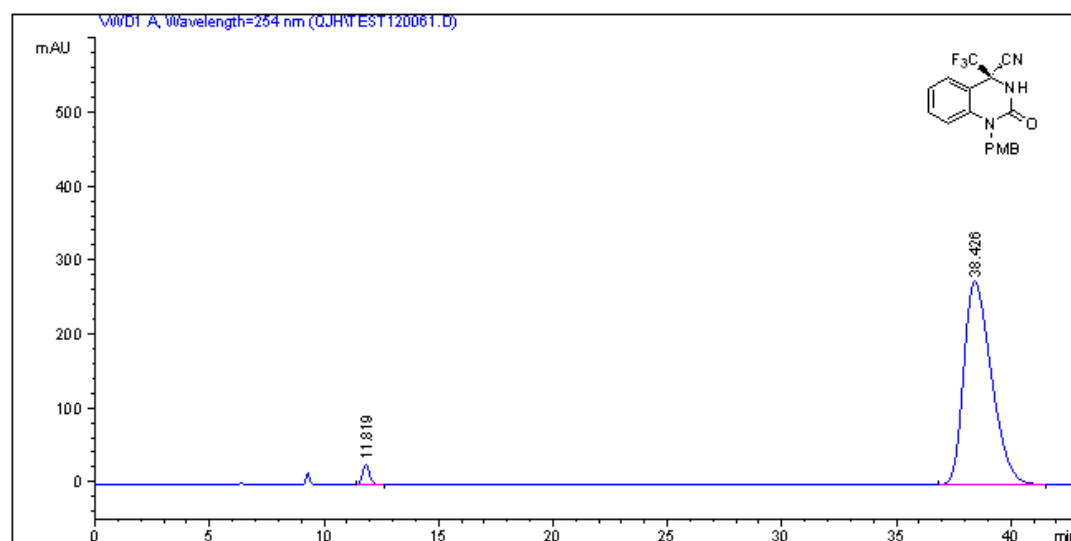

| Peak # | RetTime [min] | Type | Width [min] | Area mAU  | Area %  | Height [mAU] | Area %  |
|--------|---------------|------|-------------|-----------|---------|--------------|---------|
| 1      | 11.819        | BB   | 0.3365      | 599.44757 | 2.5284  | 27.43248     | 2.5284  |
| 2      | 38.426        | BB   | 1.2988      | 2.31088e4 | 97.4716 | 274.71786    | 97.4716 |

Sample Info : 254 nm, IC, i-PrOH : Hexane =20:80, 0.8mL/min

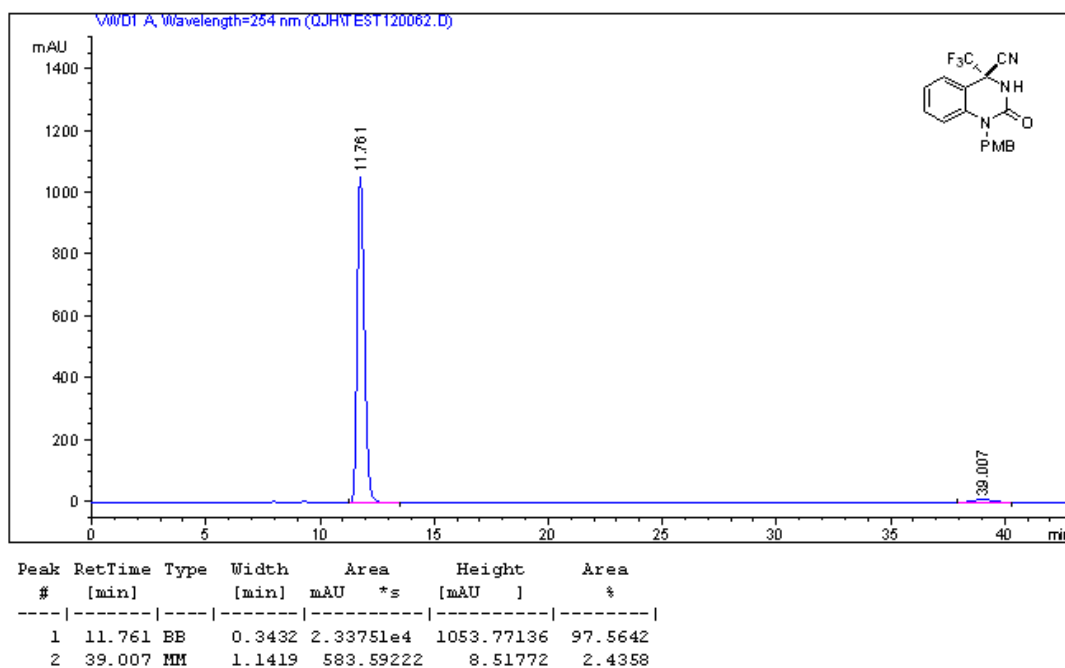

Sample Info : 254 nm, IC, i-PrOH : Hexane =20:80, 0.8mL/min

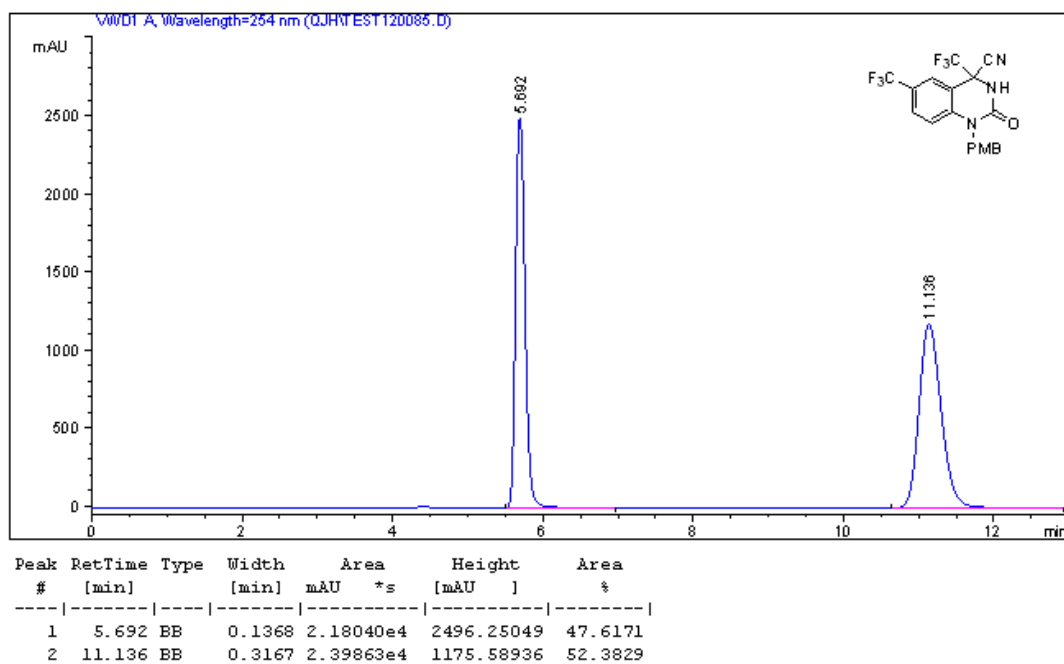

Sample Info : 254 nm, IC, i-PrOH : Hexane =20:80, 0.8mL/min

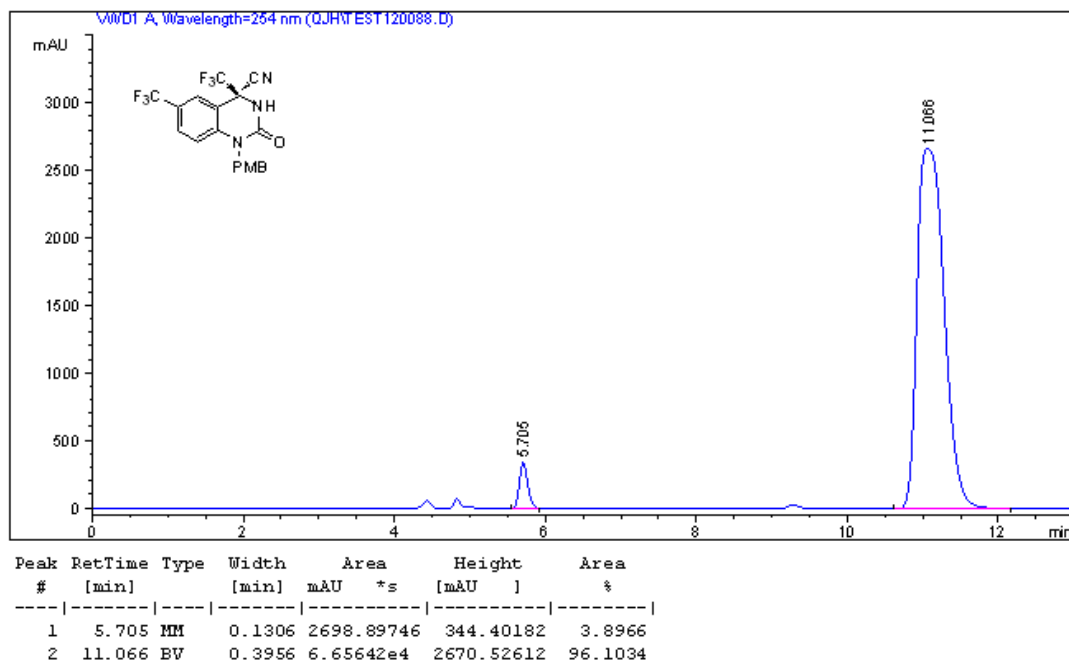

Sample Info : 254 nm, IC, i-PrOH : Hexane =20:80, 0.8mL/min

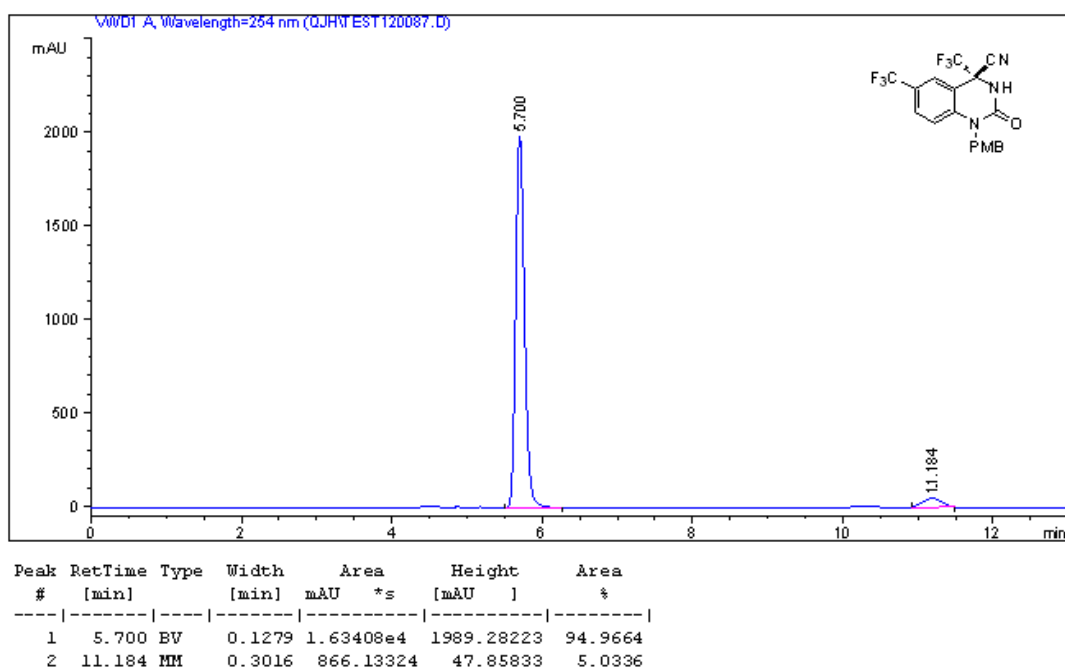

Sample Info : 254 nm, IC, i-PrOH : Hexane =20:80, 1.0 mL/min

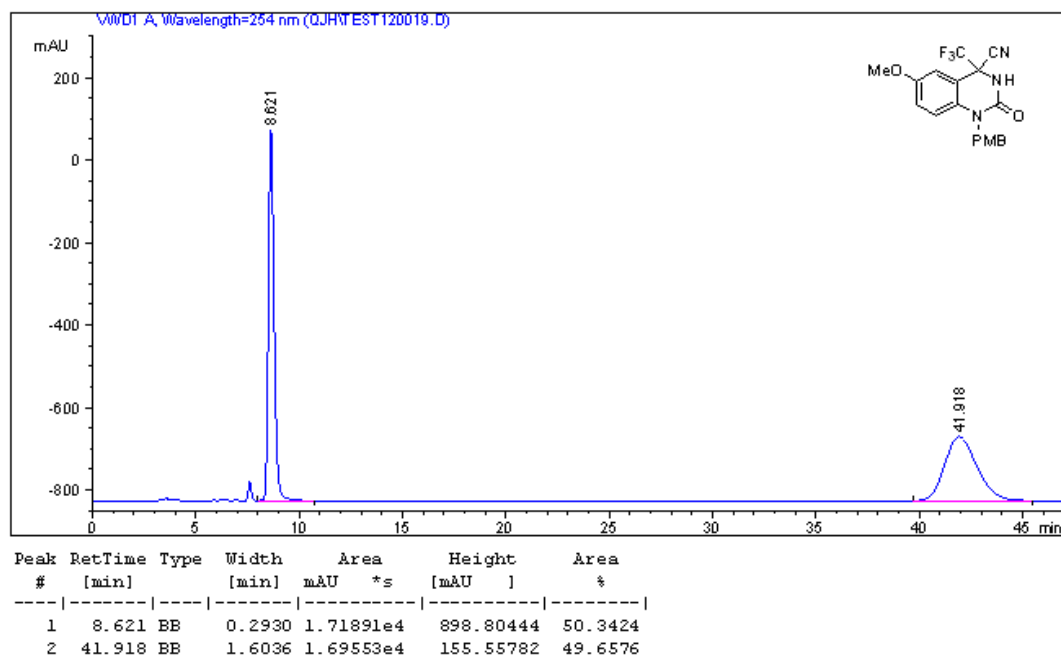

Sample Info : 254 nm, IC, i-PrOH : Hexane =20:80, 1.0 mL/min

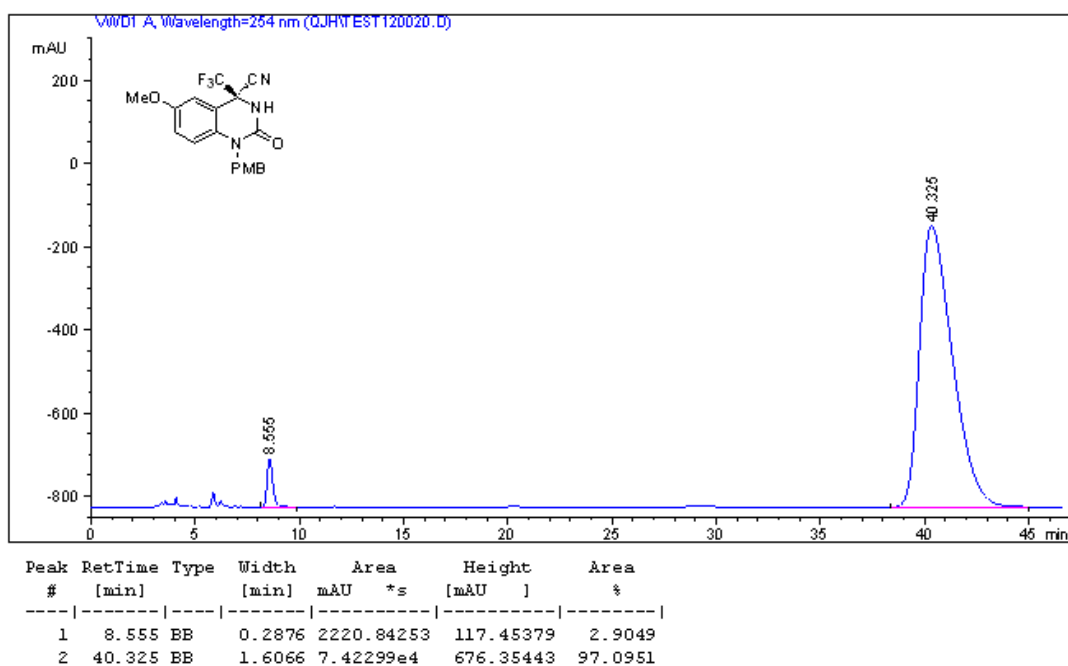

Sample Info : 254 nm, IC, i-PrOH : Hexane =20:80, 1.0 mL/min

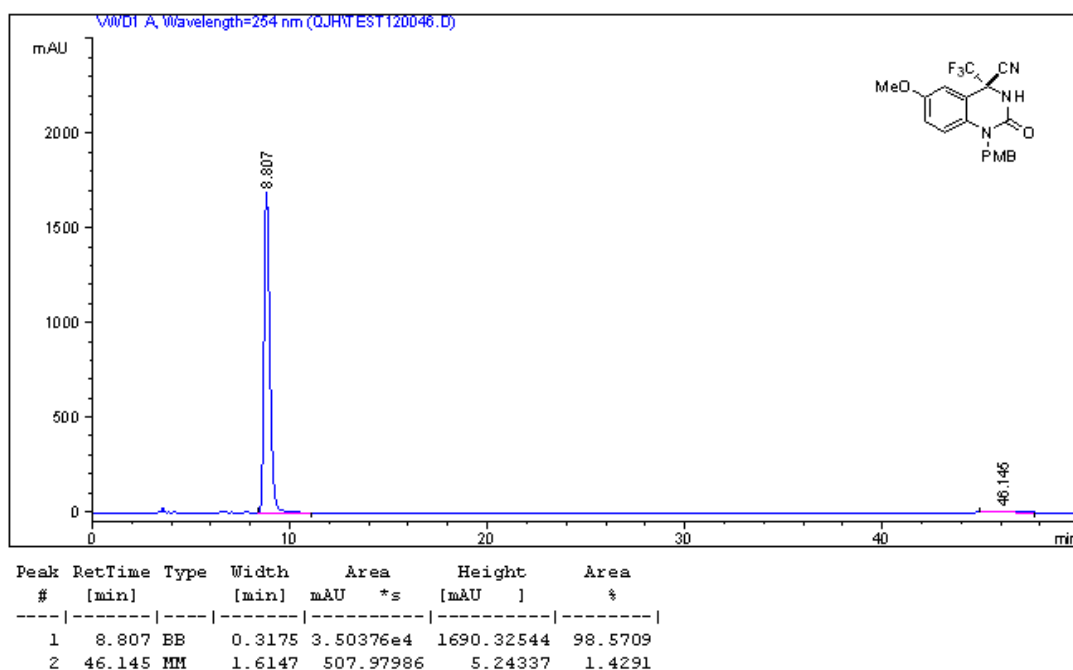

Sample Info : 254 nm, IC, i-PrOH : Hexane =20:80, 0.8mL/min

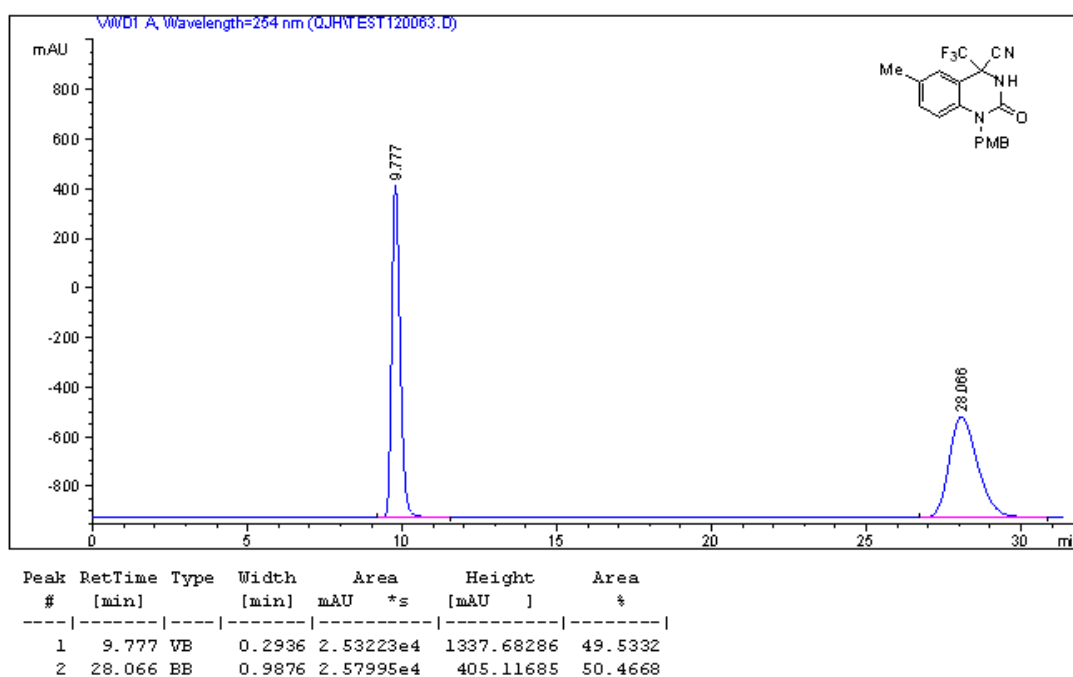

Sample Info : 254 nm, IC, i-PrOH : Hexane =20:80, 0.8mL/min

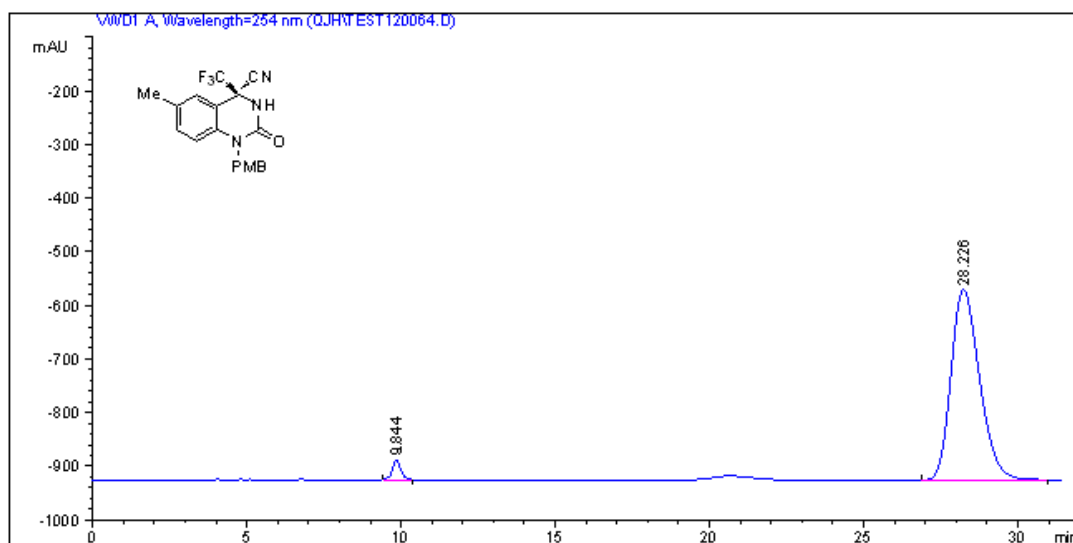

Sample Info : 254 nm, IC, i-PrOH : Hexane =20:80, 0.8mL/min

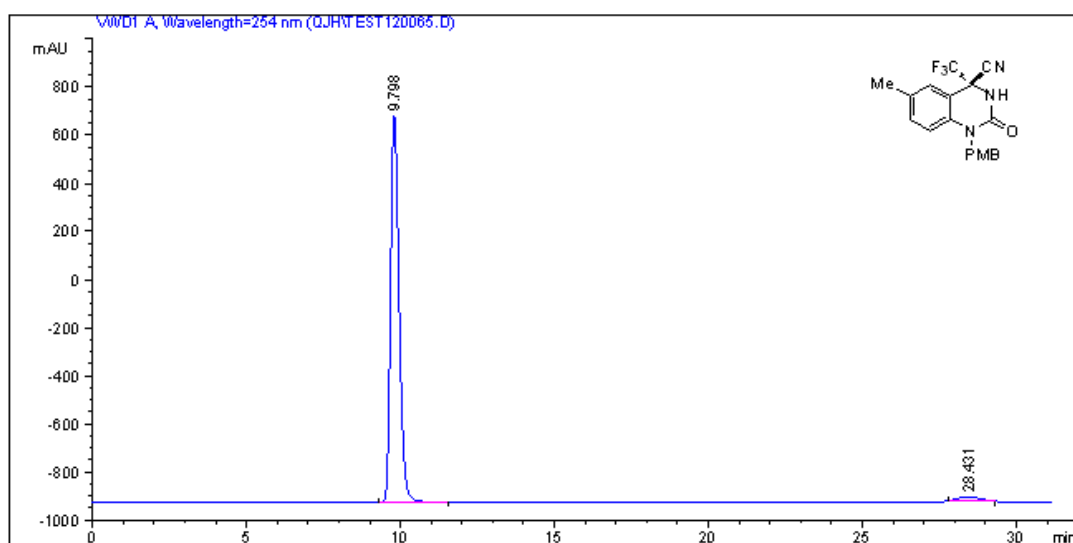



Sample Info : 254 nm, IC, i-PrOH : Hexane =20:80, 1.0 mL/min

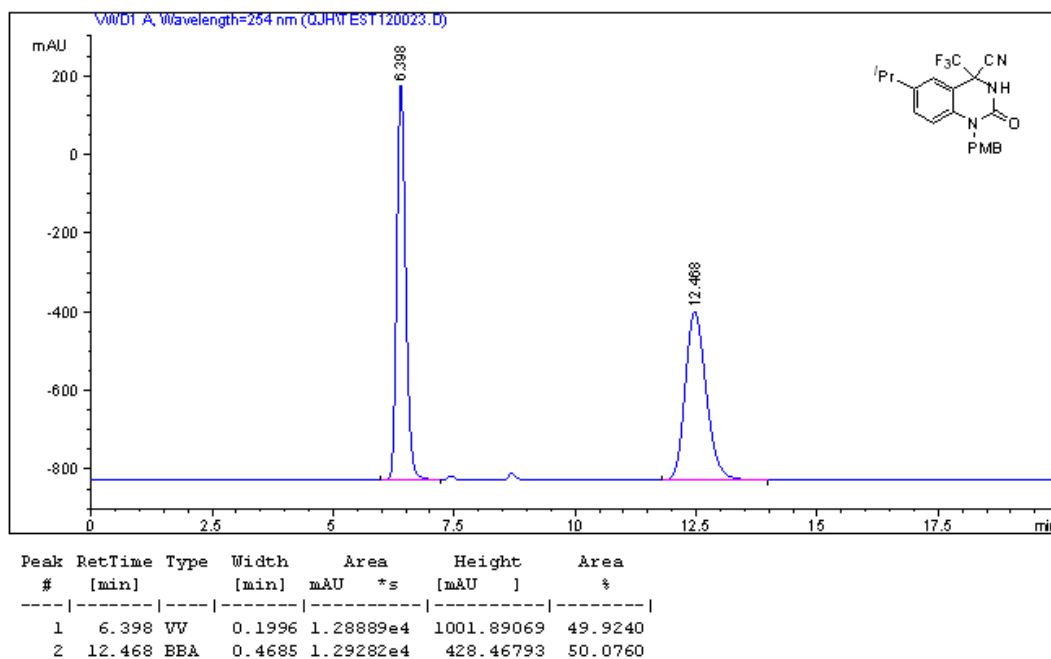

Sample Info : 254 nm, IC, i-PrOH : Hexane =20:80, 1.0 mL/min

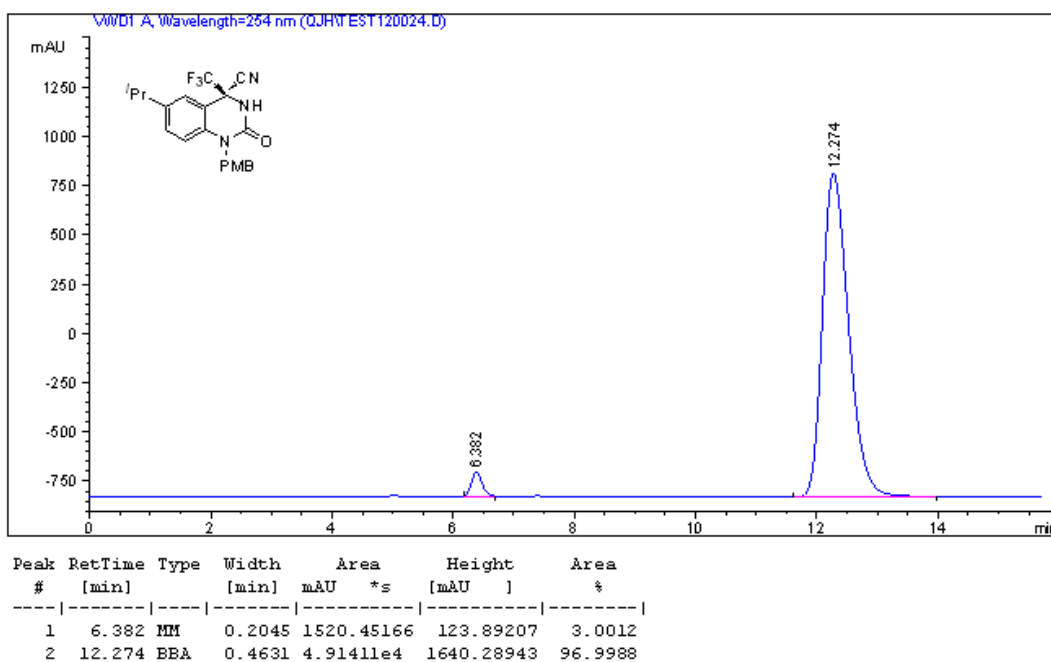

Sample Info : 254 nm, IC, i-PrOH : Hexane =20:80, 1.0 mL/min

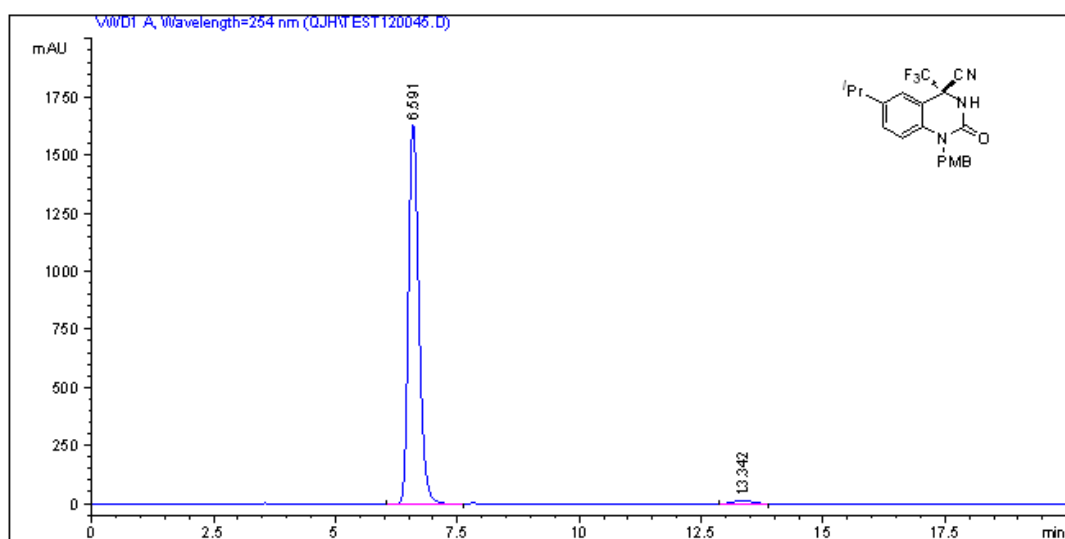

| Peak # | RetTime [min] | Type | Width [min] | Area mAU  | Area %  | Height [mAU] | Area %  |
|--------|---------------|------|-------------|-----------|---------|--------------|---------|
| 1      | 6.591         | VV   | 0.2302      | 2.45402e4 | 98.1170 | 1637.19055   | 98.1170 |
| 2      | 13.342        | MM   | 0.5133      | 470.96539 | 1.8830  | 15.29134     | 1.8830  |

Sample Info : 254 nm, IC, i-PrOH : Hexane =25:75, 0.8mL/min

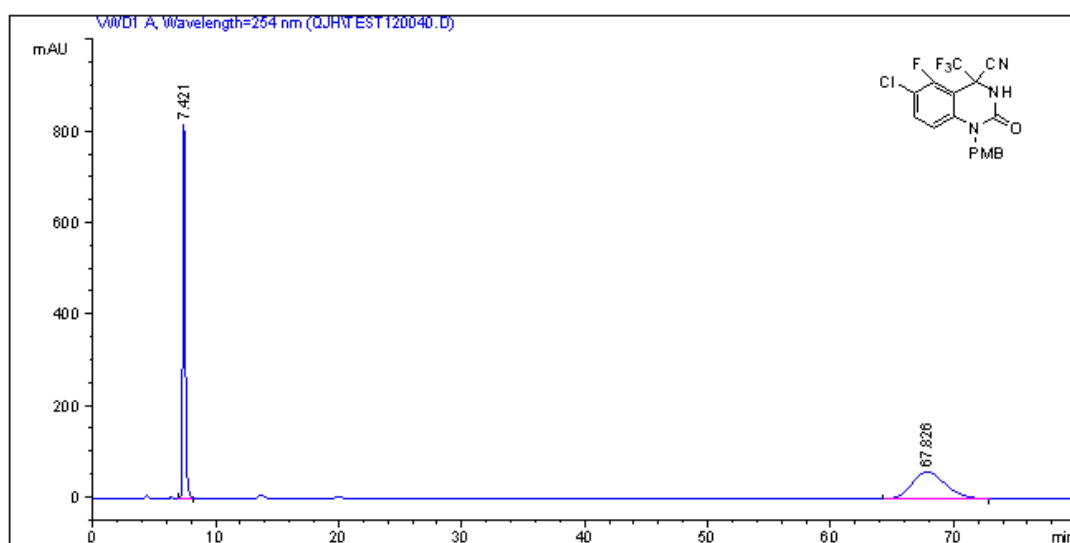

| Peak # | RetTime [min] | Type | Width [min] | Area mAU  | Area %  | Height [mAU] | Area %  |
|--------|---------------|------|-------------|-----------|---------|--------------|---------|
| 1      | 7.421         | BBA  | 0.2165      | 1.15087e4 | 50.4472 | 818.20526    | 50.4472 |
| 2      | 67.826        | BB   | 2.8396      | 1.13047e4 | 49.5528 | 58.96277     | 49.5528 |

Sample Info : 254 nm, IC, i-PrOH : Hexane =25:75, 0.8 mL/min

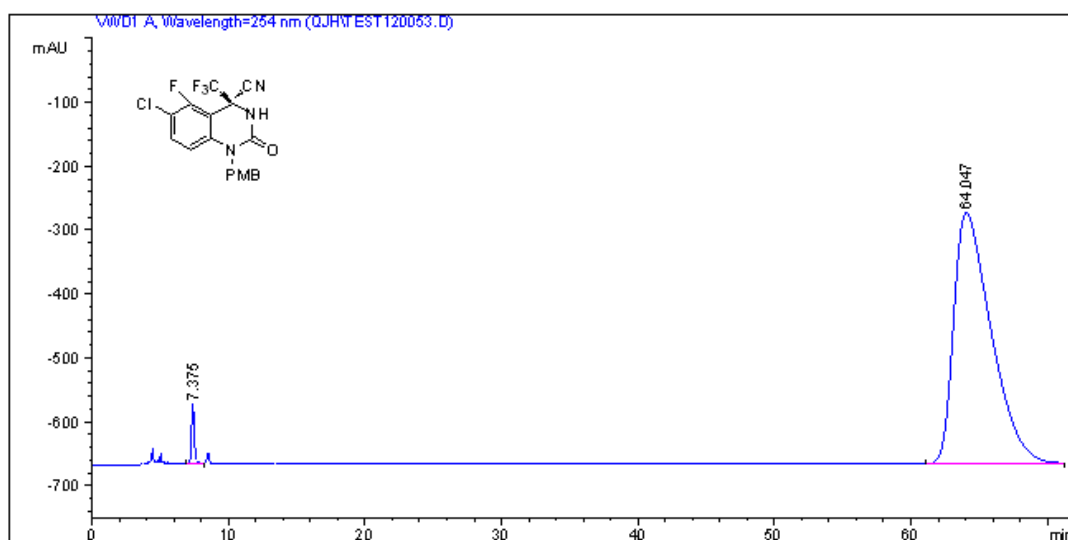

Sample Info : 254 nm, IC, i-PrOH : Hexane =25:75, 0.8 mL/min

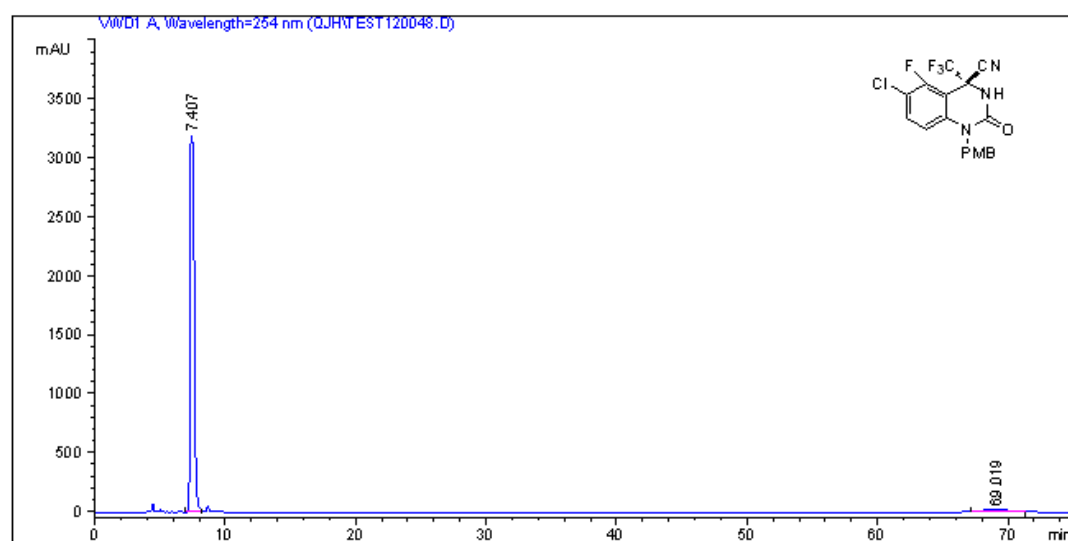

Sample Info : 254nm, IB, i-PrOH : Hexane =10:90, 1.0 mL/min

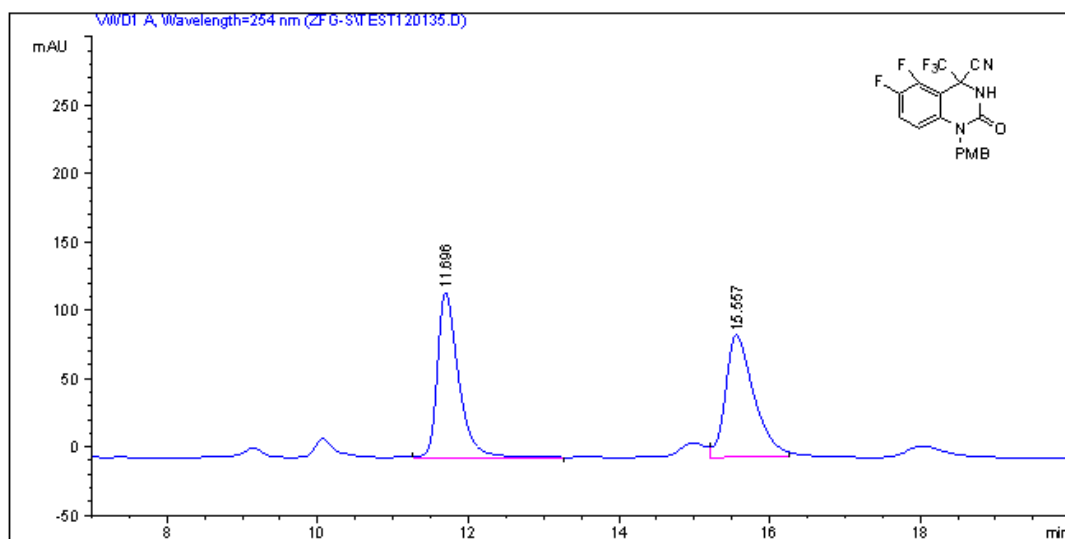

Sample Info : 254nm, IB, i-PrOH : Hexane =10:90, 1.0 mL/min

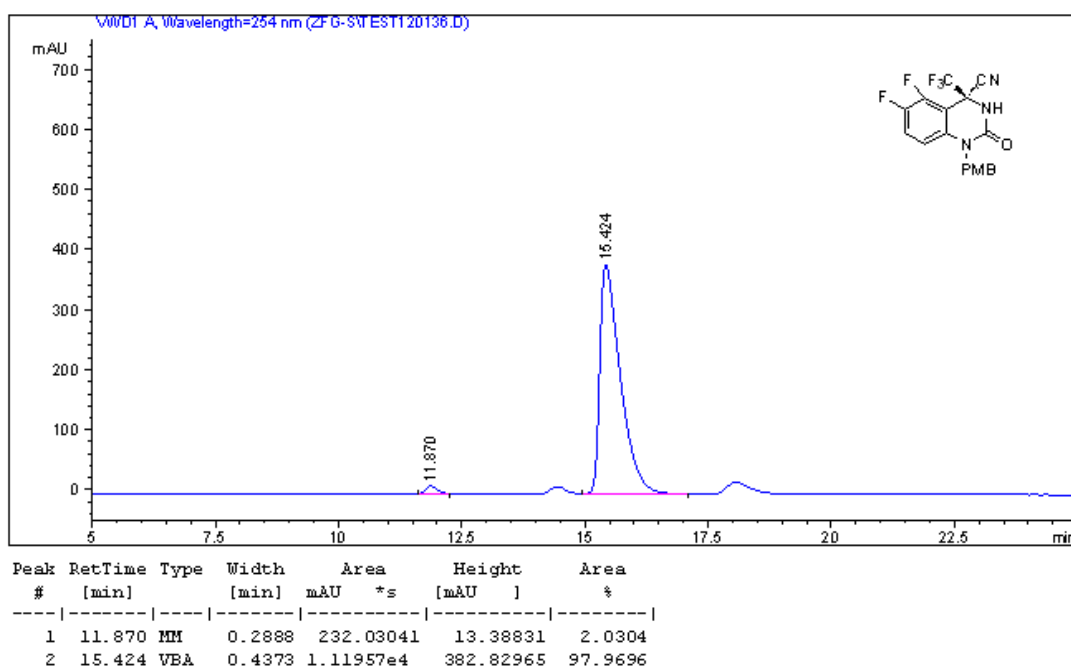

Sample Info : 254nm, IB, i-PrOH : Hexane =10:90, 1.0 mL/min

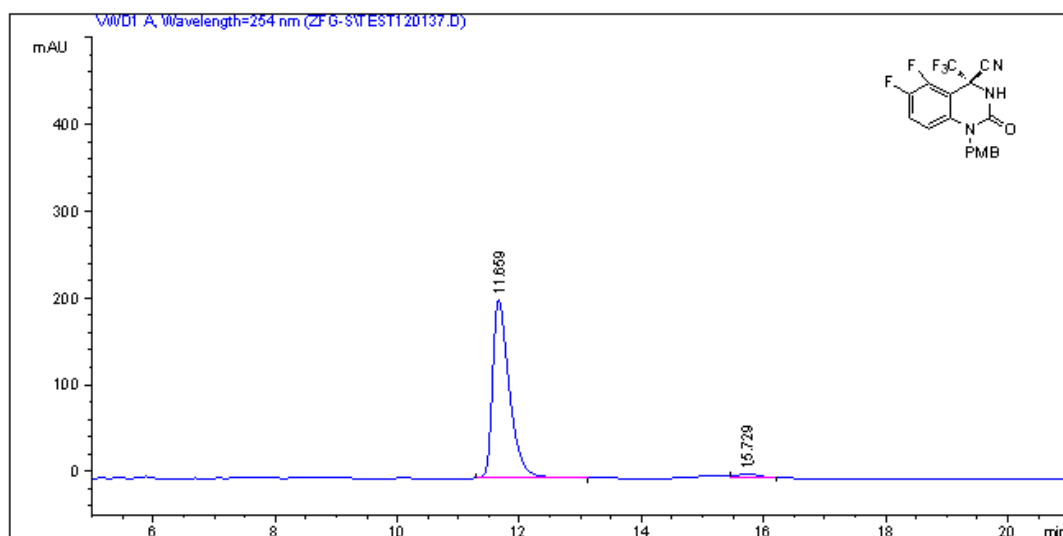

Sample Info : 254 nm, IC, i-PrOH : Hexane =10:90, 0.8mL/min

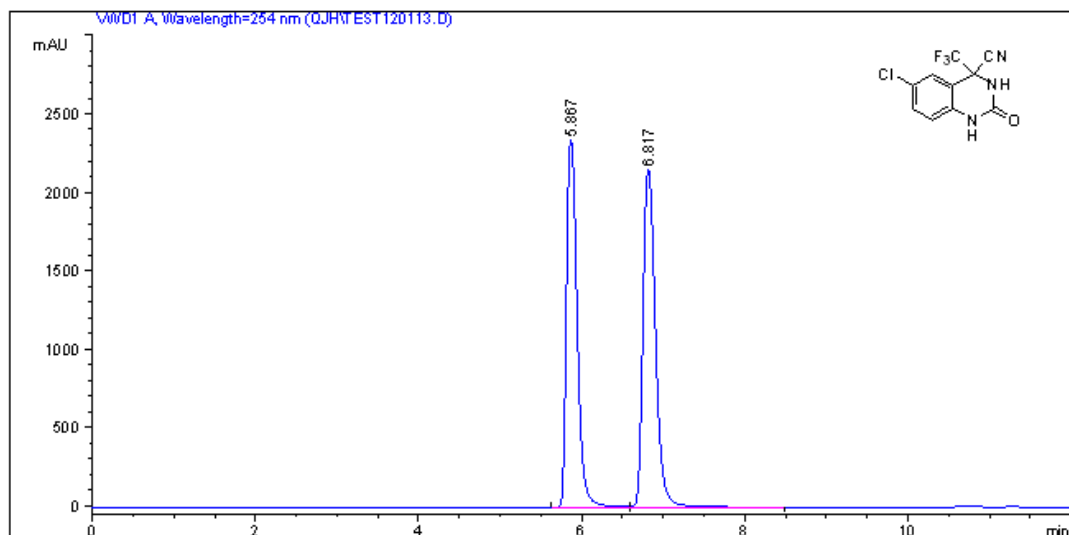

Sample Info : 254 nm, IC, i-PrOH : Hexane =10:90, 0.8mL/min

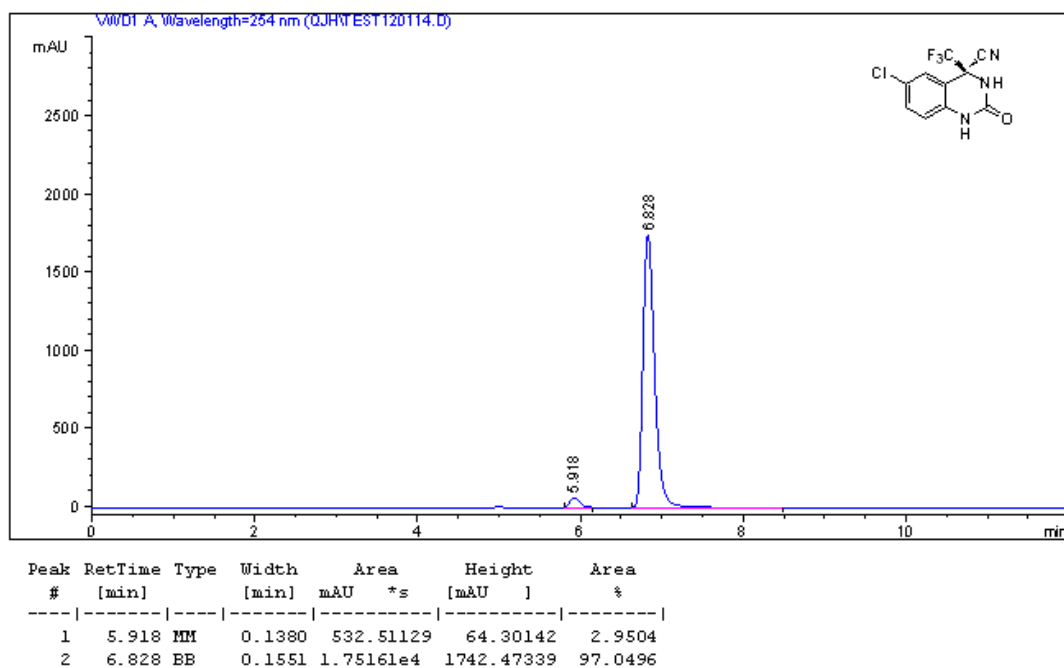

Sample Info : 254 nm, IC, i-PrOH : Hexane =10:90, 0.8mL/min

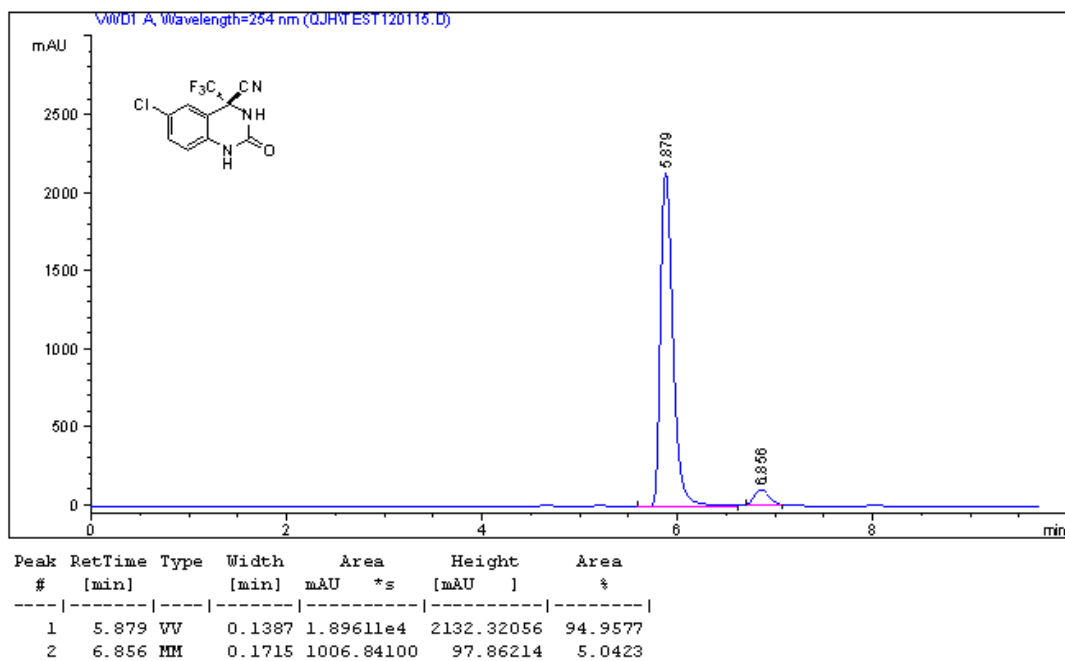

Sample Info : 254 nm, IC, i-PrOH : Hexane =20:80, 1.0 mL/min

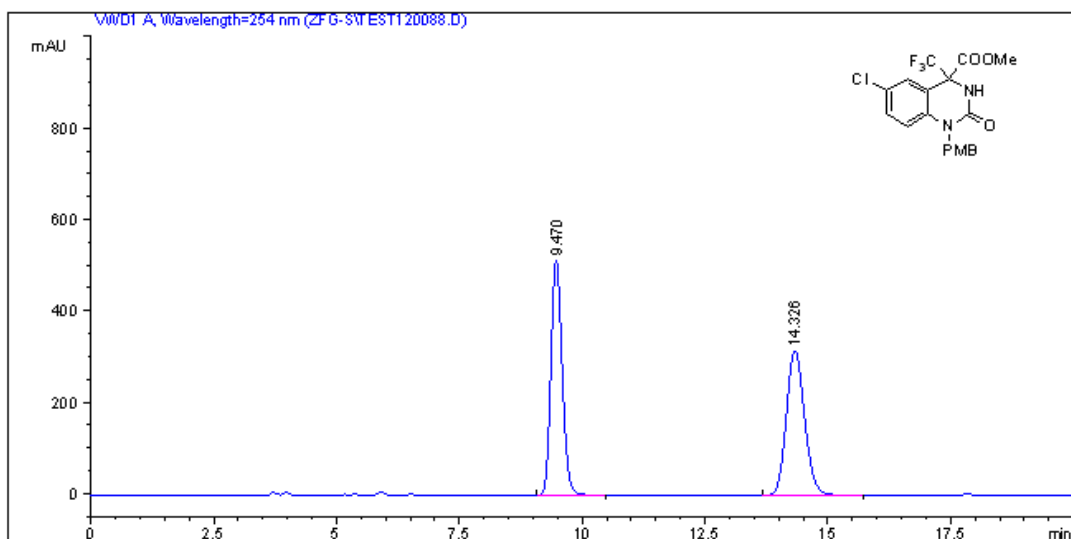

| Peak # | RetTime [min] | Type | Width [min] | Area mAU   | *s | Height [mAU] | Area %  |
|--------|---------------|------|-------------|------------|----|--------------|---------|
| 1      | 9.470         | BB   | 0.2470      | 8186.90430 |    | 513.86078    | 50.0335 |
| 2      | 14.326        | VB   | 0.3995      | 8175.95459 |    | 317.39954    | 49.9665 |

Sample Info : 254 nm, IC, i-PrOH : Hexane =20:80, 1.0 mL/min

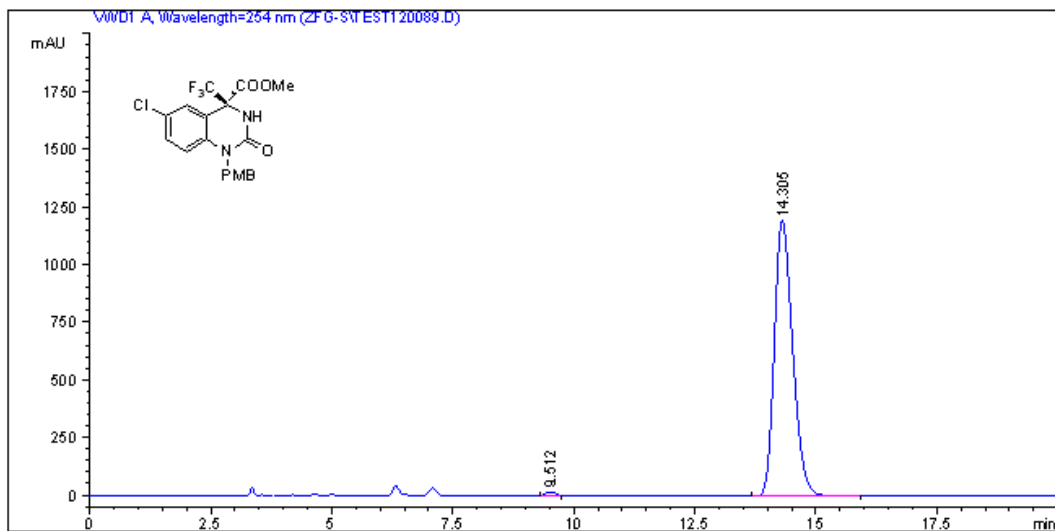

| Peak # | RetTime [min] | Type | Width [min] | Area mAU  | *s | Height [mAU] | Area %  |
|--------|---------------|------|-------------|-----------|----|--------------|---------|
| 1      | 9.512         | MM   | 0.2415      | 257.41647 |    | 17.76429     | 0.8119  |
| 2      | 14.305        | BB   | 0.4065      | 3.14473e4 |    | 1193.20544   | 99.1881 |

Sample Info : 254nm, IC, i-PrOH : Hexane = 20:80, 1.0 mL/min

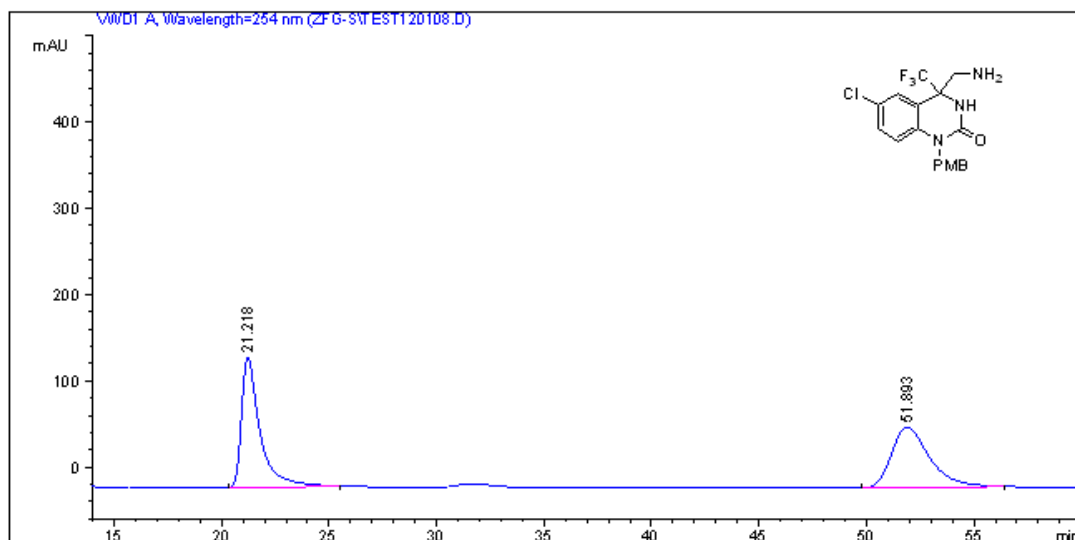

| Peak # | RetTime [min] | Type | Width [min] | Area mAU   | Height [mAU] | Area %  |
|--------|---------------|------|-------------|------------|--------------|---------|
| 1      | 21.218        | BB   | 0.8730      | 9119.36230 | 151.72989    | 51.1482 |
| 2      | 51.893        | BB   | 1.8653      | 8709.92480 | 70.41467     | 48.8518 |

Sample Info : 254nm, IC, i-PrOH : Hexane = 20:80, 1.0 mL/min

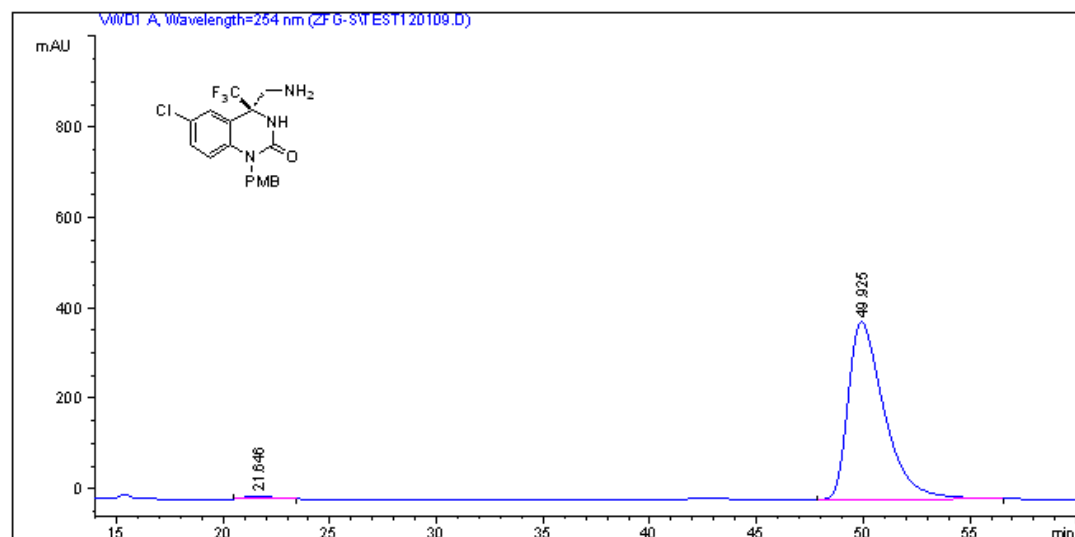

| Peak # | RetTime [min] | Type | Width [min] | Area mAU  | Height [mAU] | Area %  |
|--------|---------------|------|-------------|-----------|--------------|---------|
| 1      | 21.646        | MM   | 1.5954      | 529.04047 | 5.52668      | 1.1297  |
| 2      | 49.925        | BB   | 1.7665      | 4.63005e4 | 393.32858    | 98.8703 |



Sample Info : 254 nm, IC, i-PrOH : Hexane =10:90, 1.0 mL/min

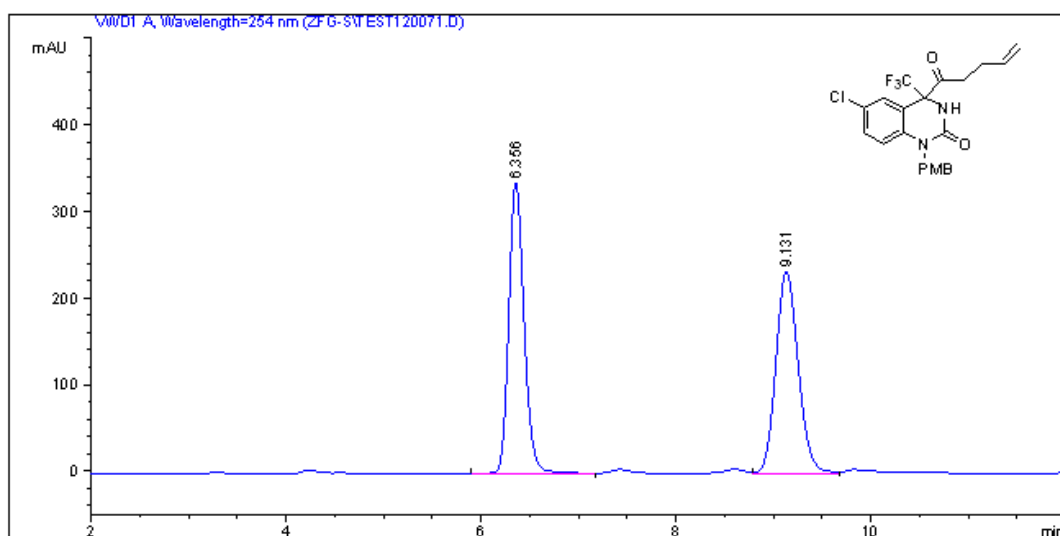

| Peak # | RetTime [min] | Type | Width [min] | Area mAU   | *s | Height [mAU] | Area %  |
|--------|---------------|------|-------------|------------|----|--------------|---------|
| 1      | 6.356         | BV   | 0.1683      | 3670.88818 |    | 335.85965    | 49.7294 |
| 2      | 9.131         | VV   | 0.2499      | 3710.83594 |    | 233.01689    | 50.2706 |

Sample Info : 254 nm, IC, i-PrOH : Hexane =10:90, 1.0 mL/min

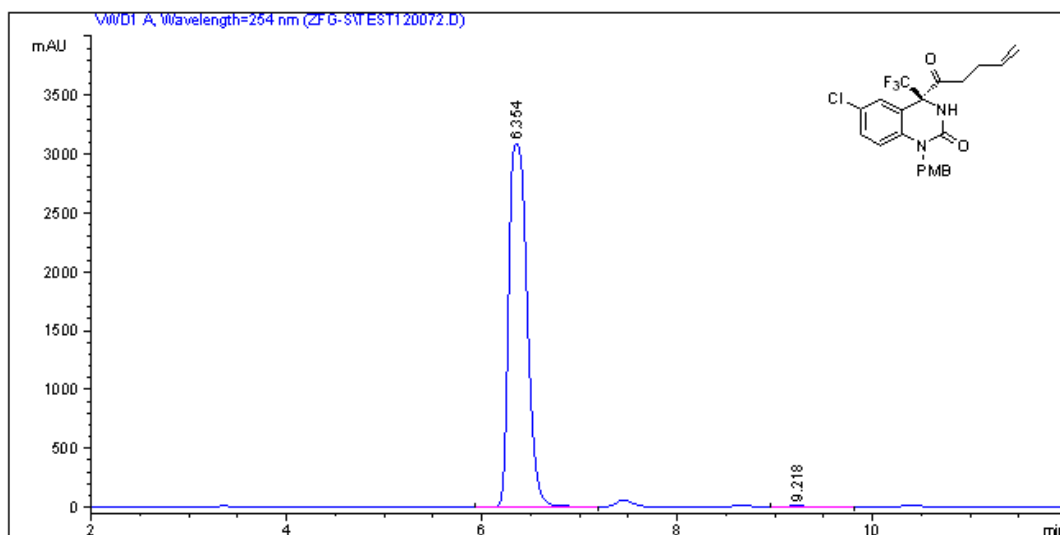

| Peak # | RetTime [min] | Type | Width [min] | Area mAU  | *s | Height [mAU] | Area %  |
|--------|---------------|------|-------------|-----------|----|--------------|---------|
| 1      | 6.354         | VBA  | 0.2072      | 4.02460e4 |    | 3092.43555   | 99.4277 |
| 2      | 9.218         | BBA  | 0.2524      | 231.64531 |    | 14.34936     | 0.5723  |

Sample Info : 254nm, IC, i-PrOH : Hexane = 5:95, 1.0 mL/min

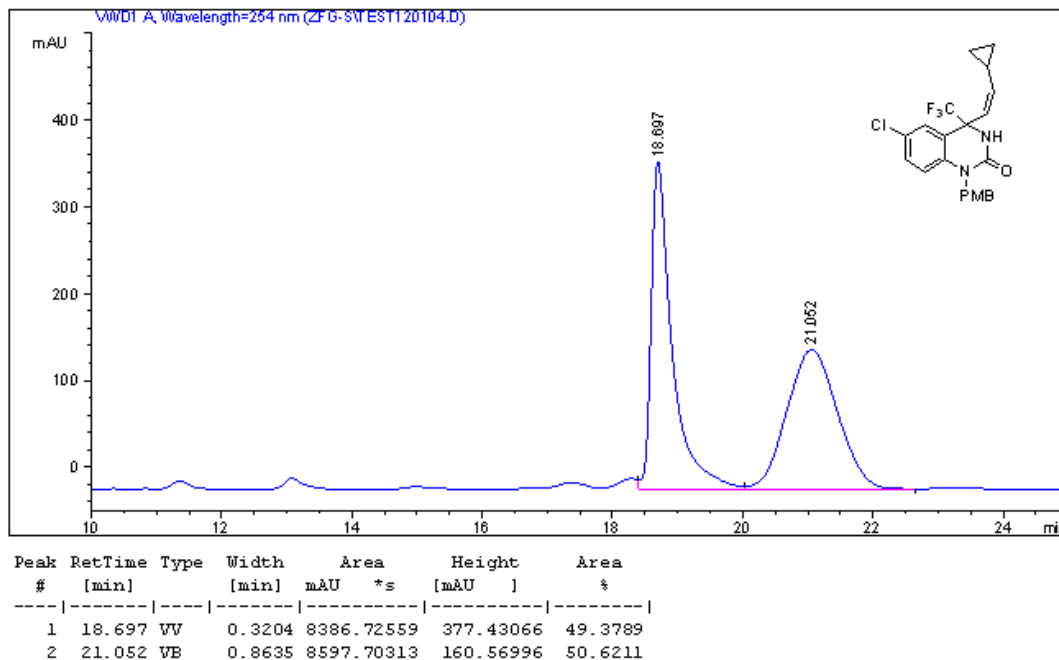

Sample Info : 254nm, IC, i-PrOH : Hexane = 5:95, 1.0 mL/min

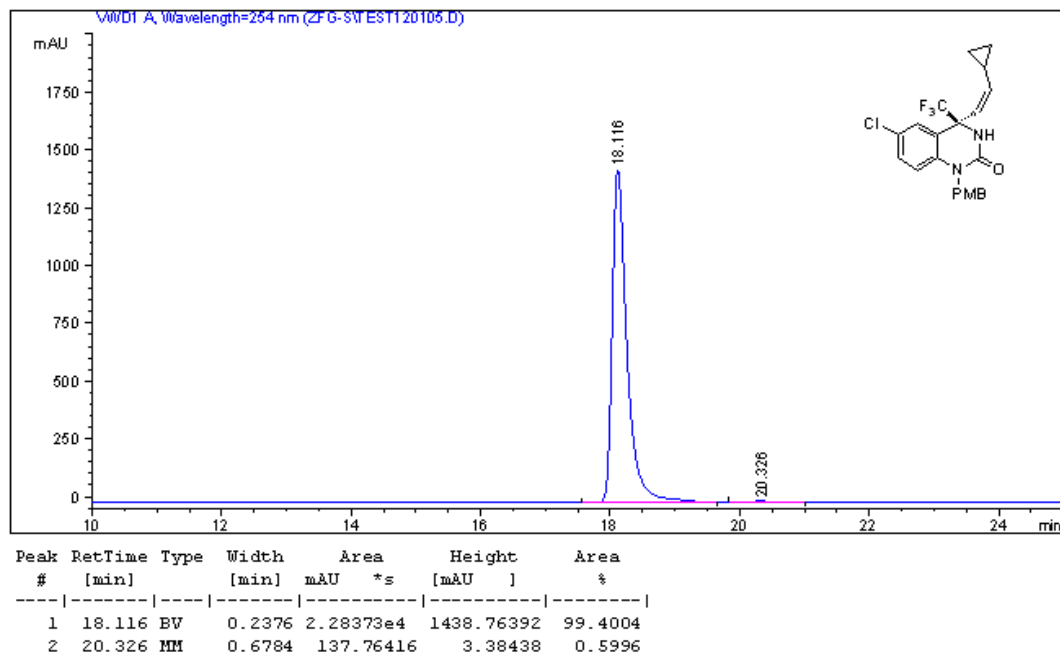

Sample Info : 254 nm, IB, i-PrOH : Hexane =5:95 1.0 mL/min

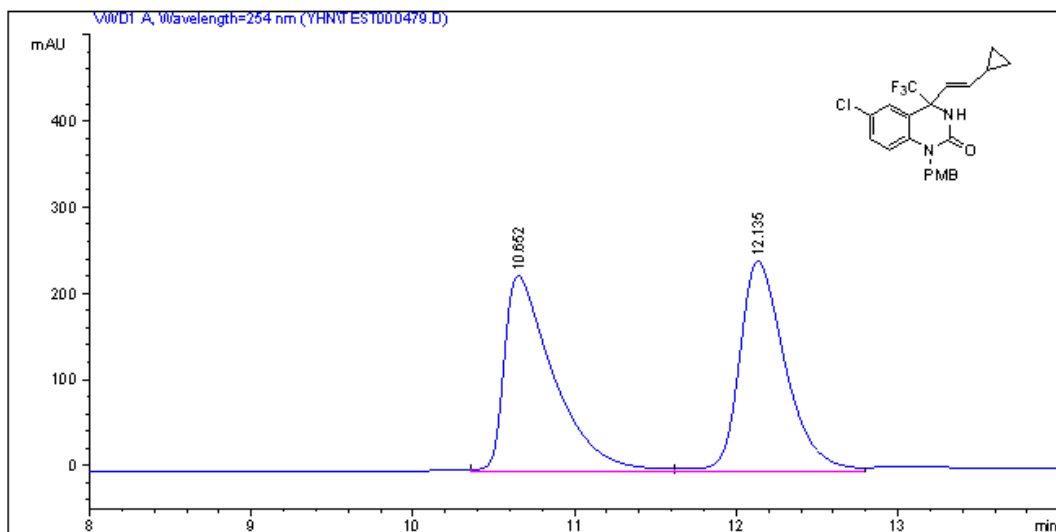

| Peak # | RetTime [min] | Type | Width [min] | Area mAU   | Area %  | Height [mAU] |
|--------|---------------|------|-------------|------------|---------|--------------|
| 1      | 10.652        | VV   | 0.3117      | 4898.34131 | 50.1320 | 228.13379    |
| 2      | 12.135        | VV   | 0.3018      | 4872.55029 | 49.8680 | 245.13243    |

Sample Info : 254 nm, IB, i-PrOH : Hexane =5:95 1.0 mL/min

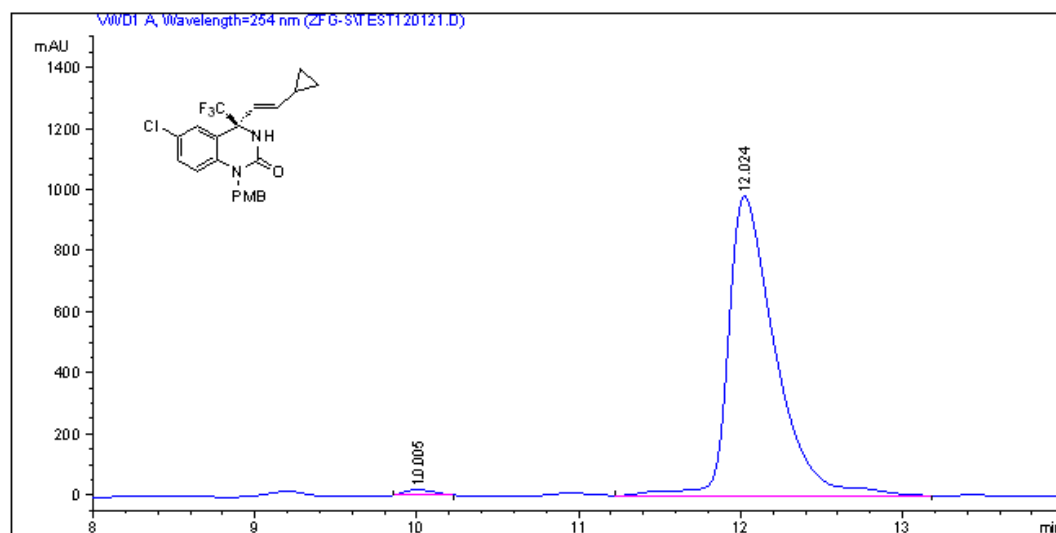

| Peak # | RetTime [min] | Type | Width [min] | Area mAU  | Area %  | Height [mAU] |
|--------|---------------|------|-------------|-----------|---------|--------------|
| 1      | 10.005        | MM   | 0.2026      | 208.85275 | 1.0236  | 17.18270     |
| 2      | 12.024        | VBA  | 0.3033      | 2.01955e4 | 98.9764 | 985.02368    |

Sample Info : 254nm, IC, i-PrOH : Hexane =4:96 0.6mL/min

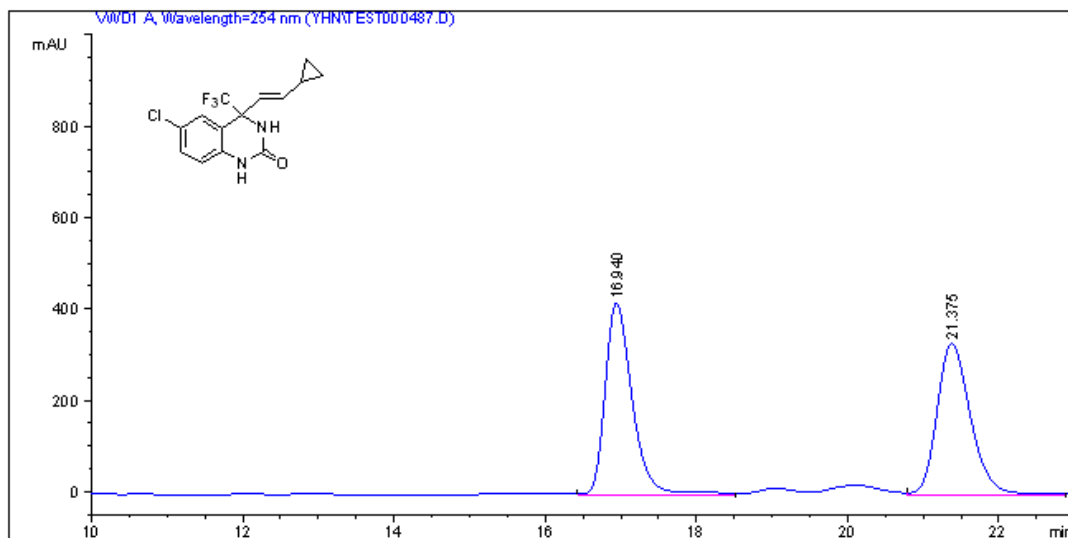

Sample Info : 254nm, IC, i-PrOH : Hexane =4:96 0.6mL/min

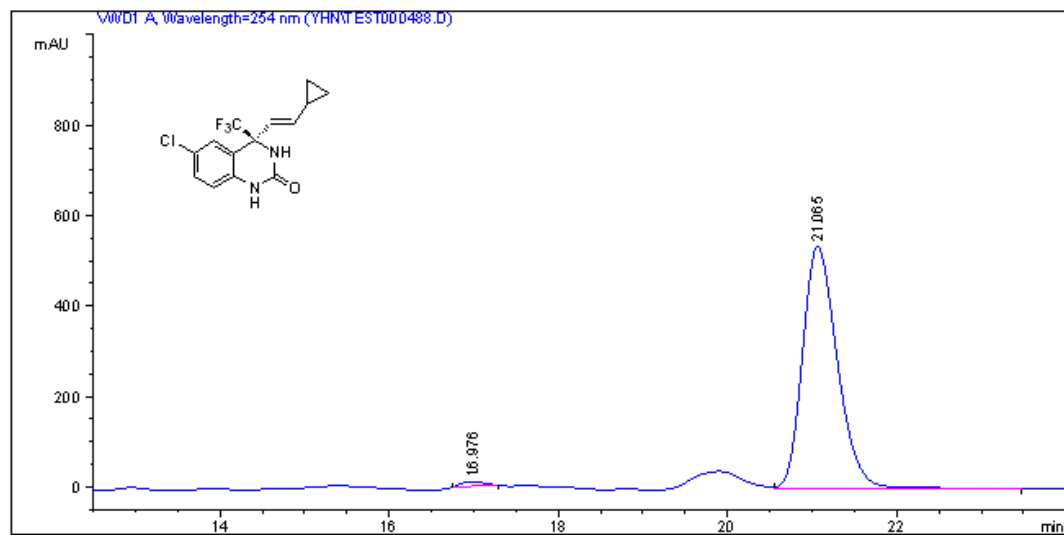

Supplement: c2cc36307k.pdf [file c2cc36307k.pdf]
